# Supplementary material
Source: publisher figshare collection journal article supplement (https://tandf.figshare.com/ndownloader/files/14077832)

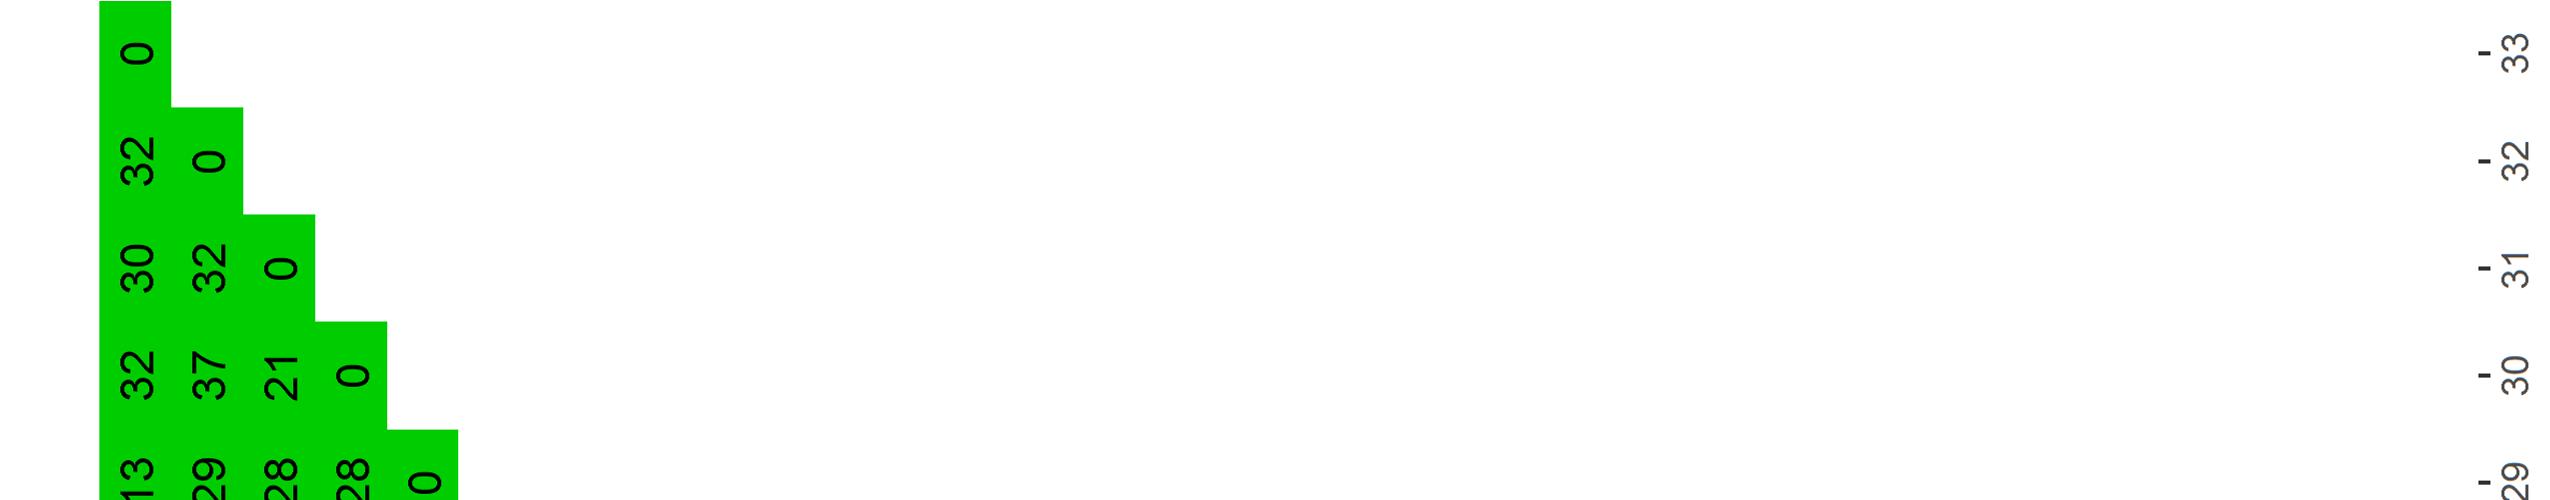

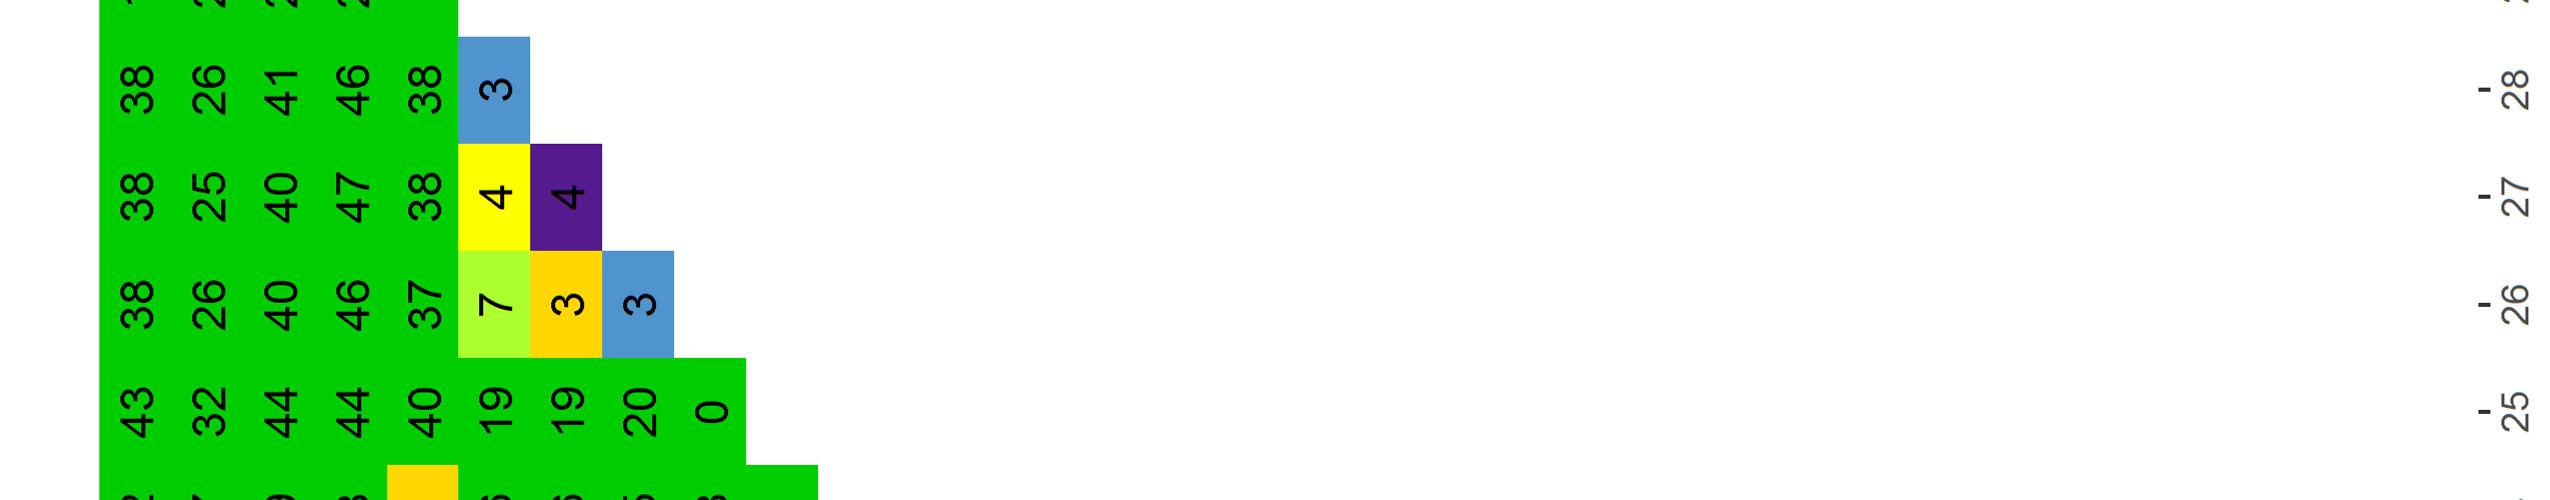

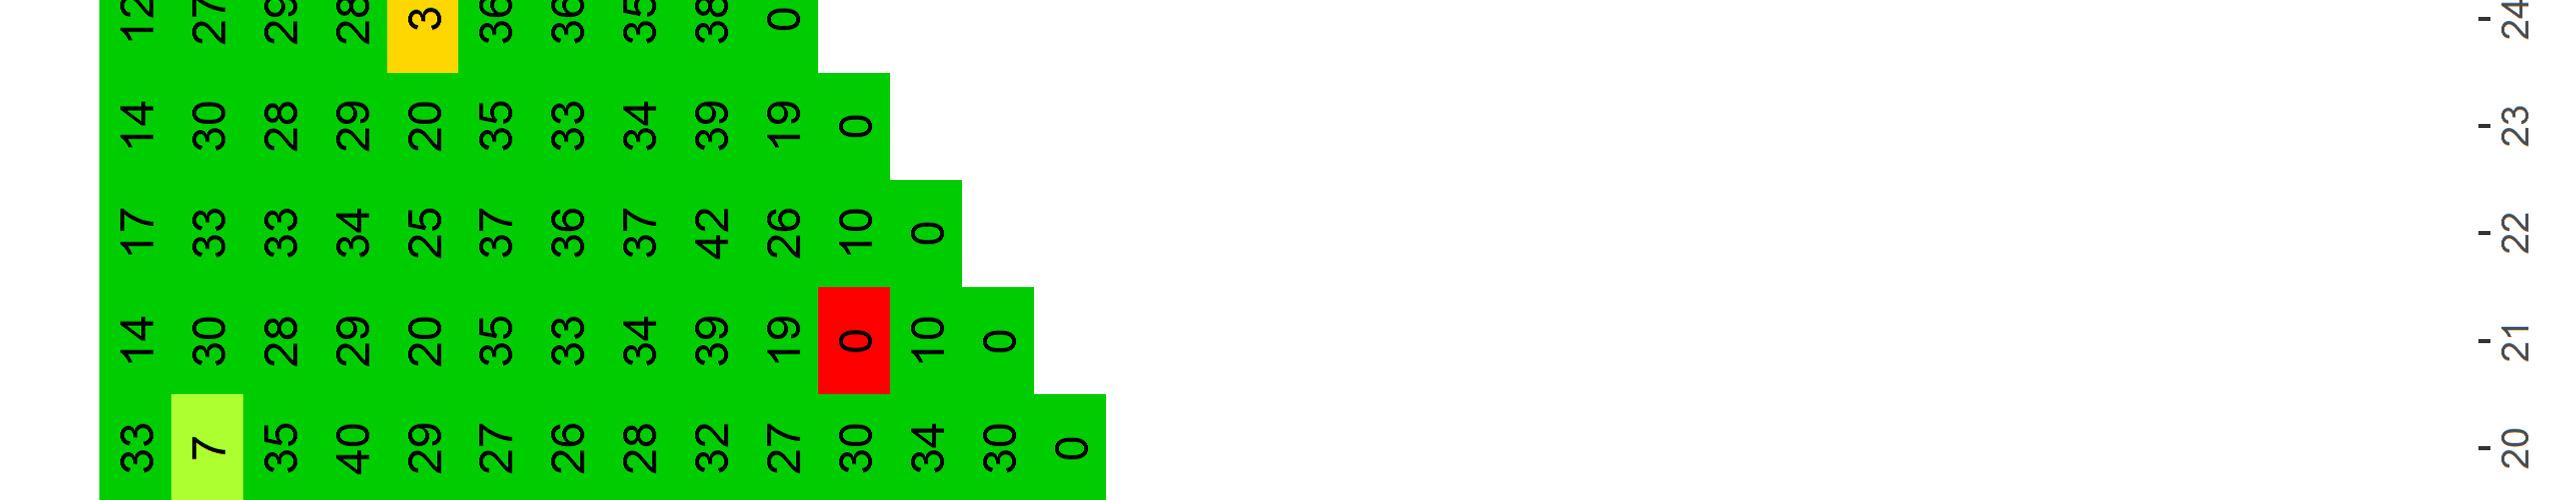

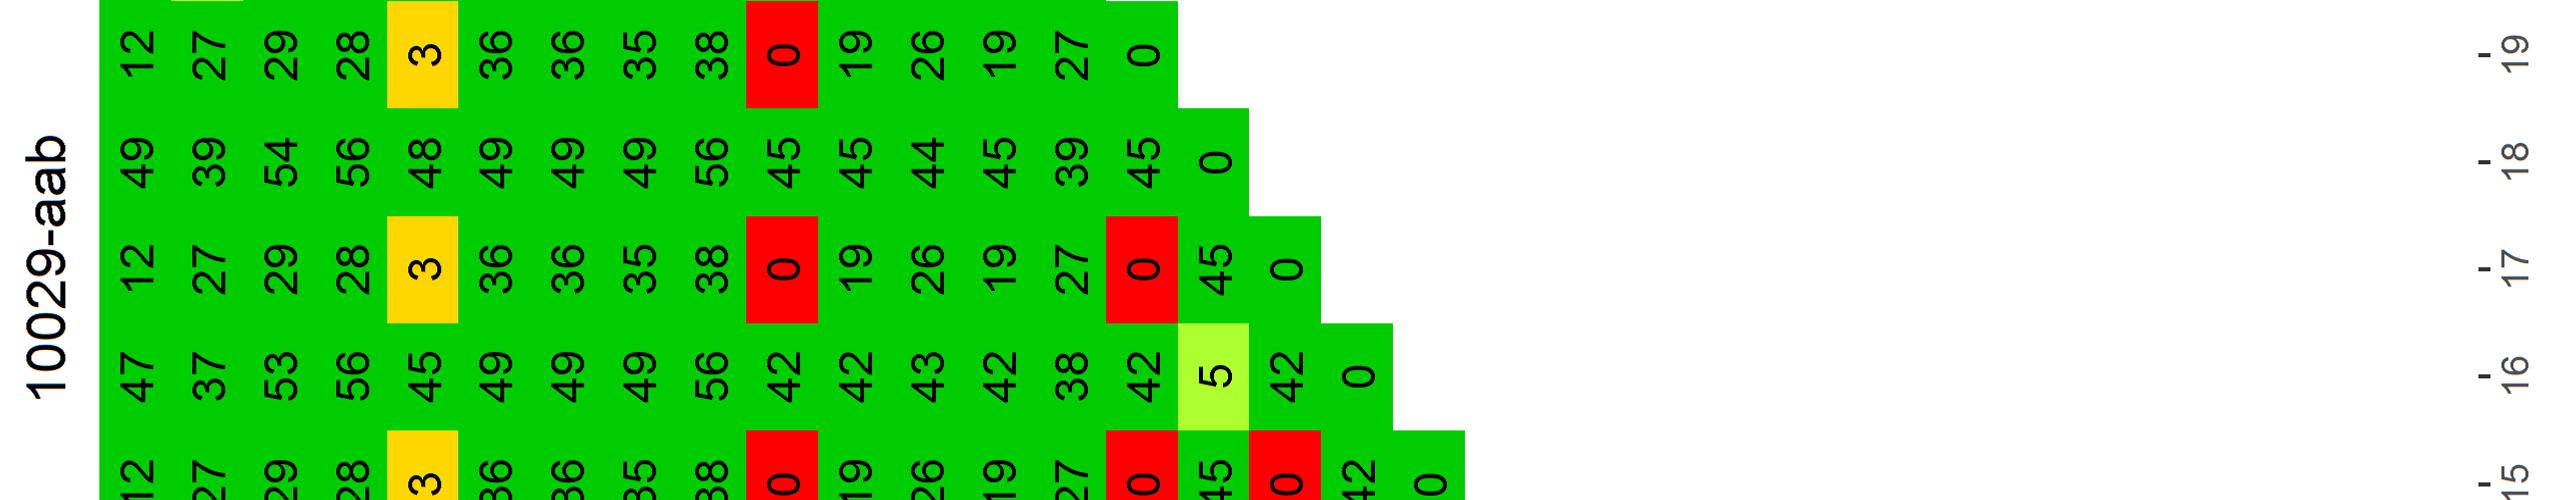

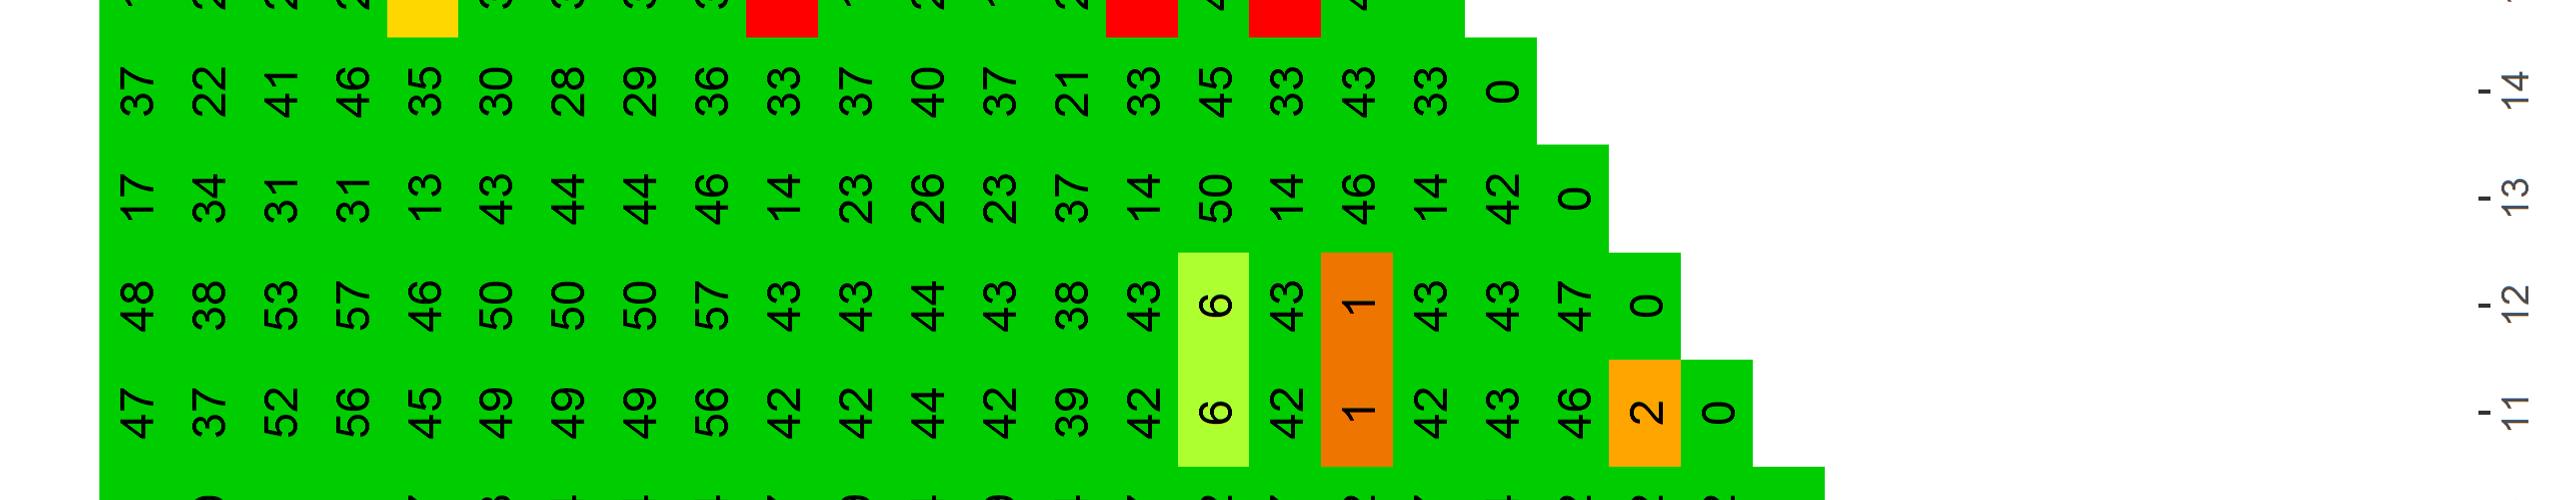

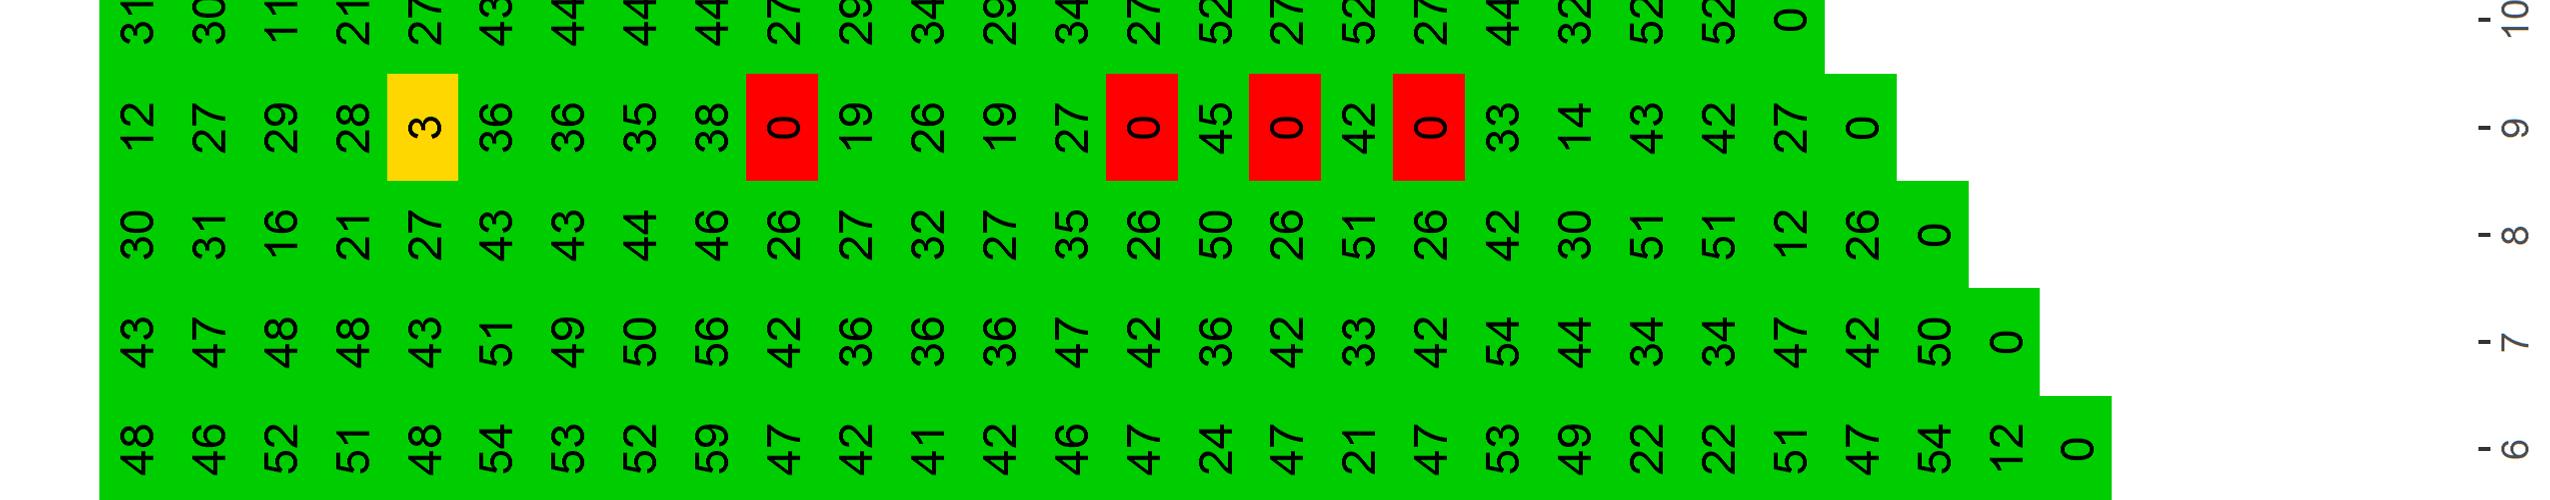

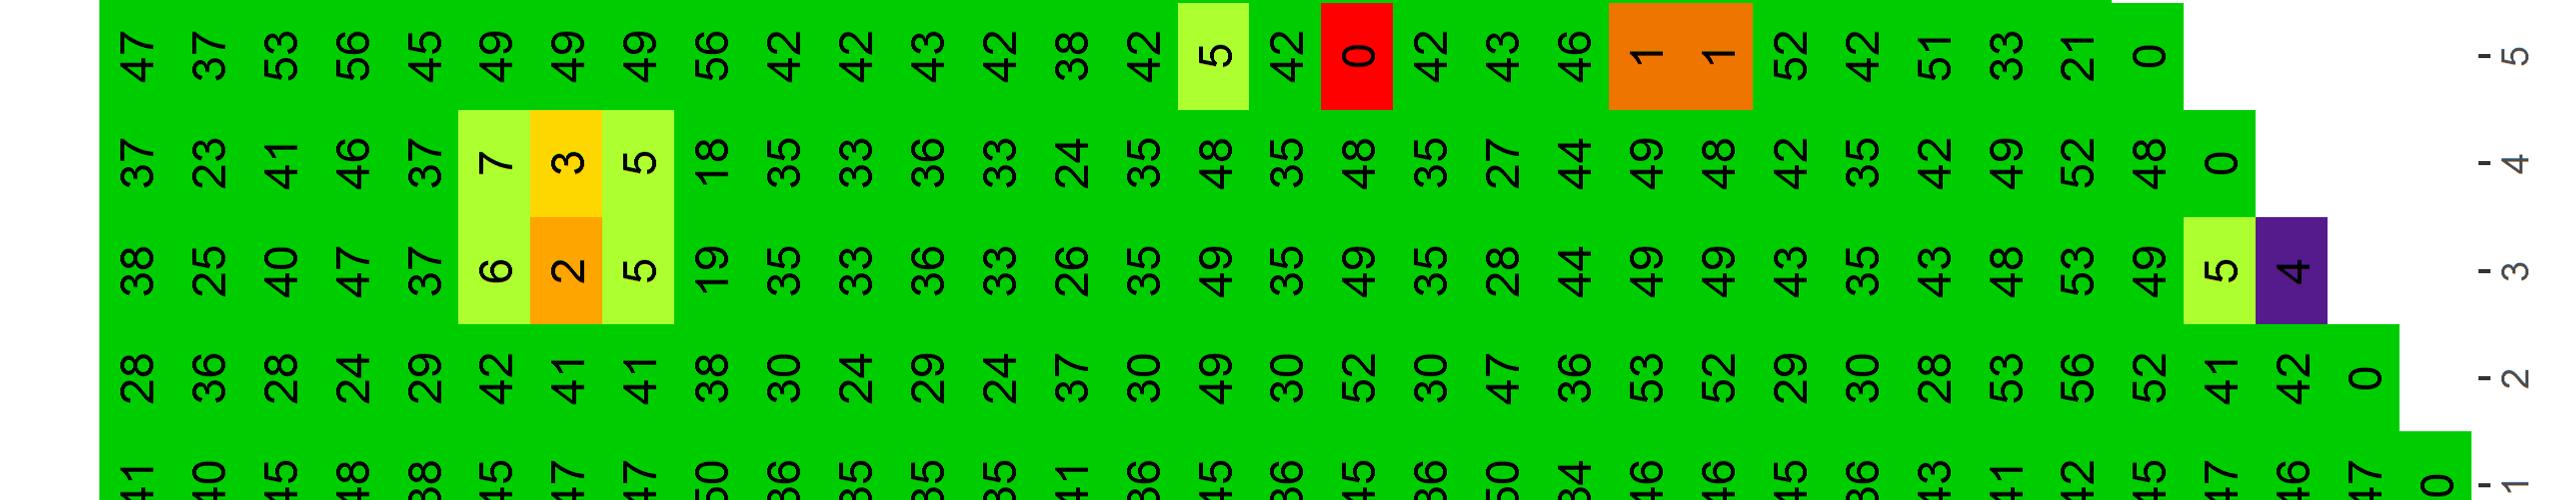

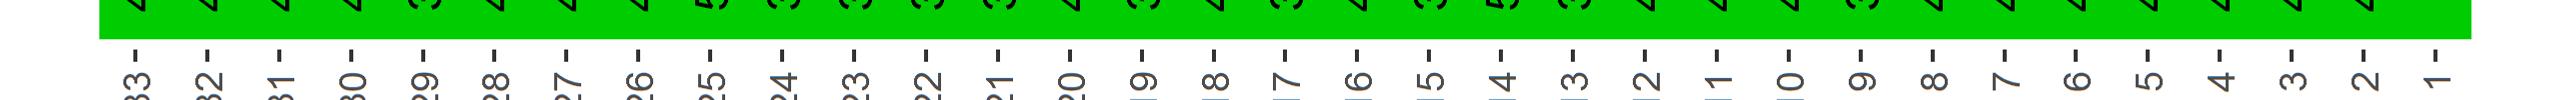

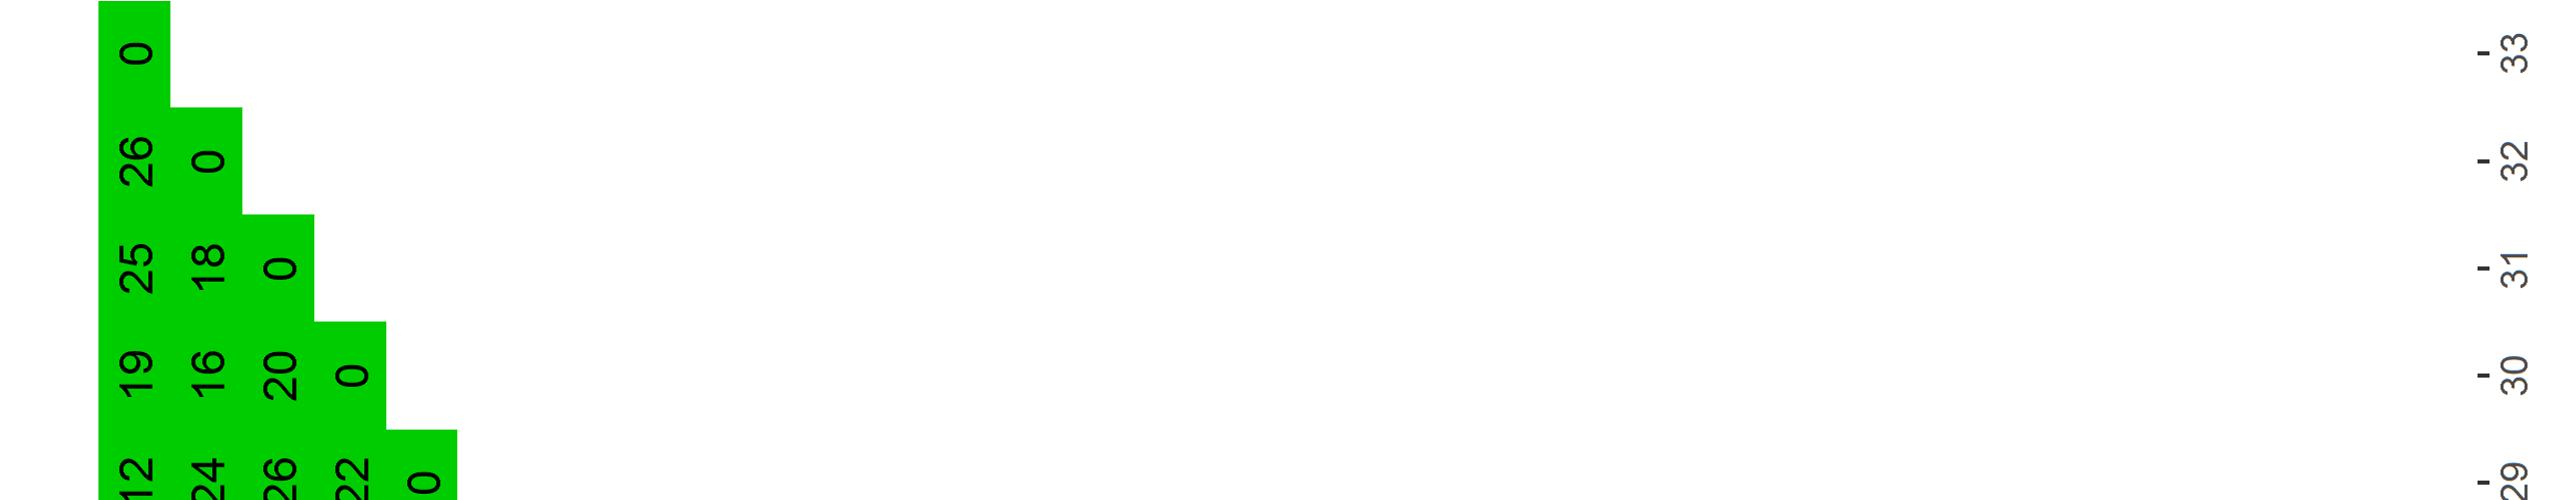

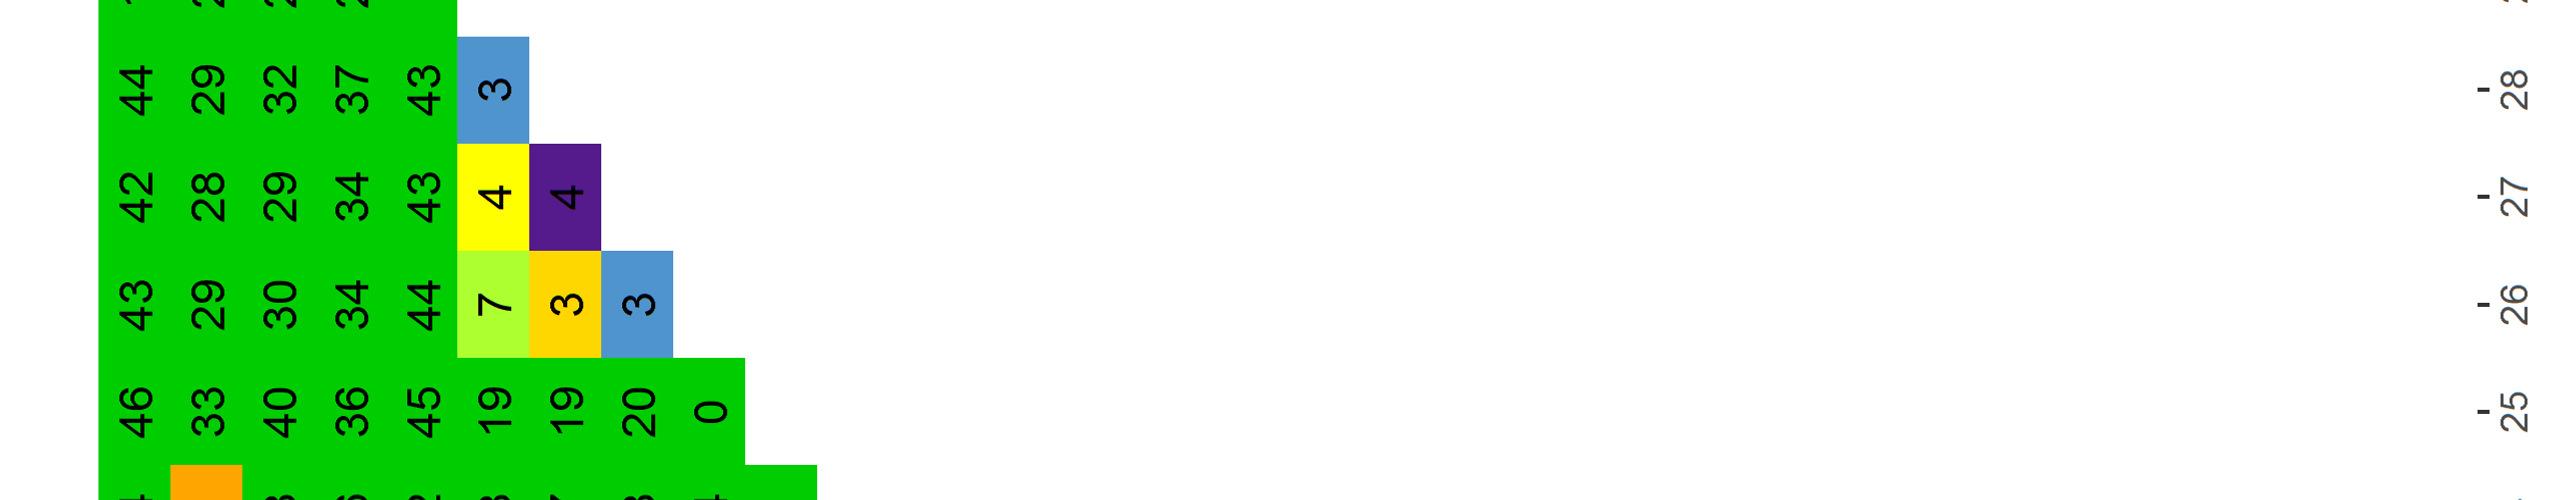

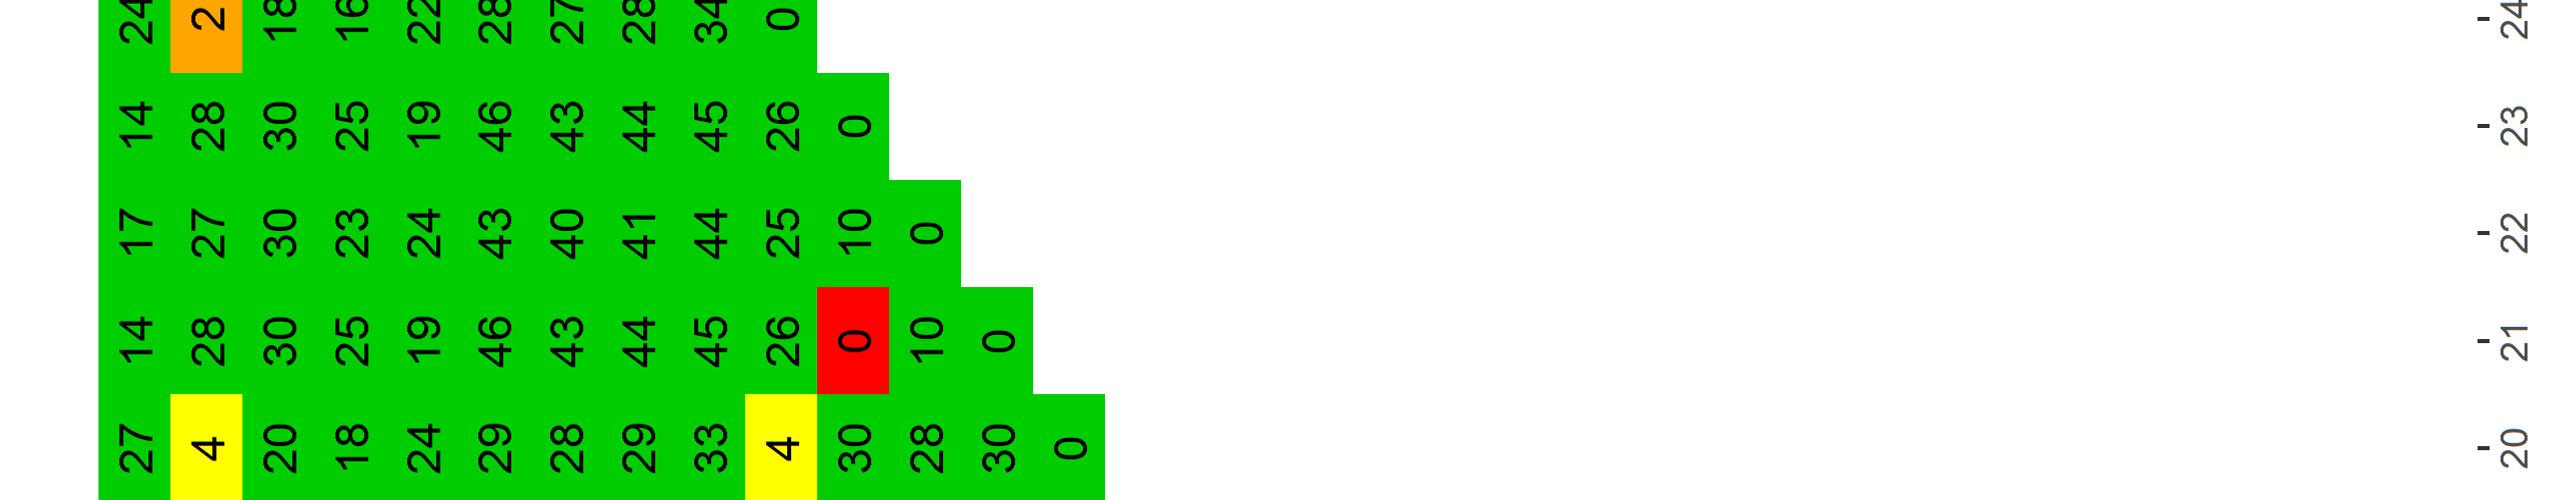

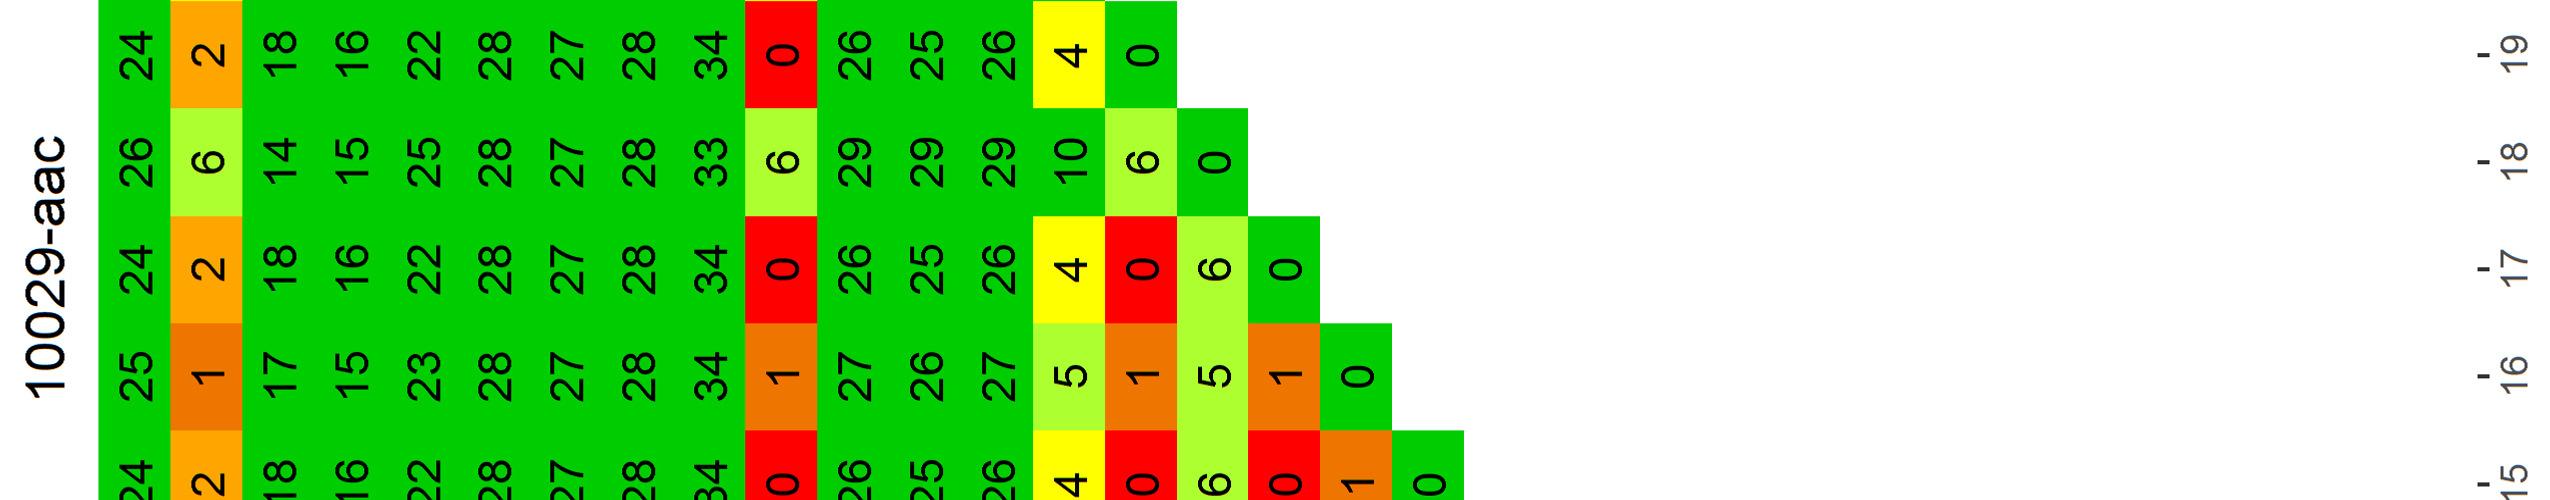

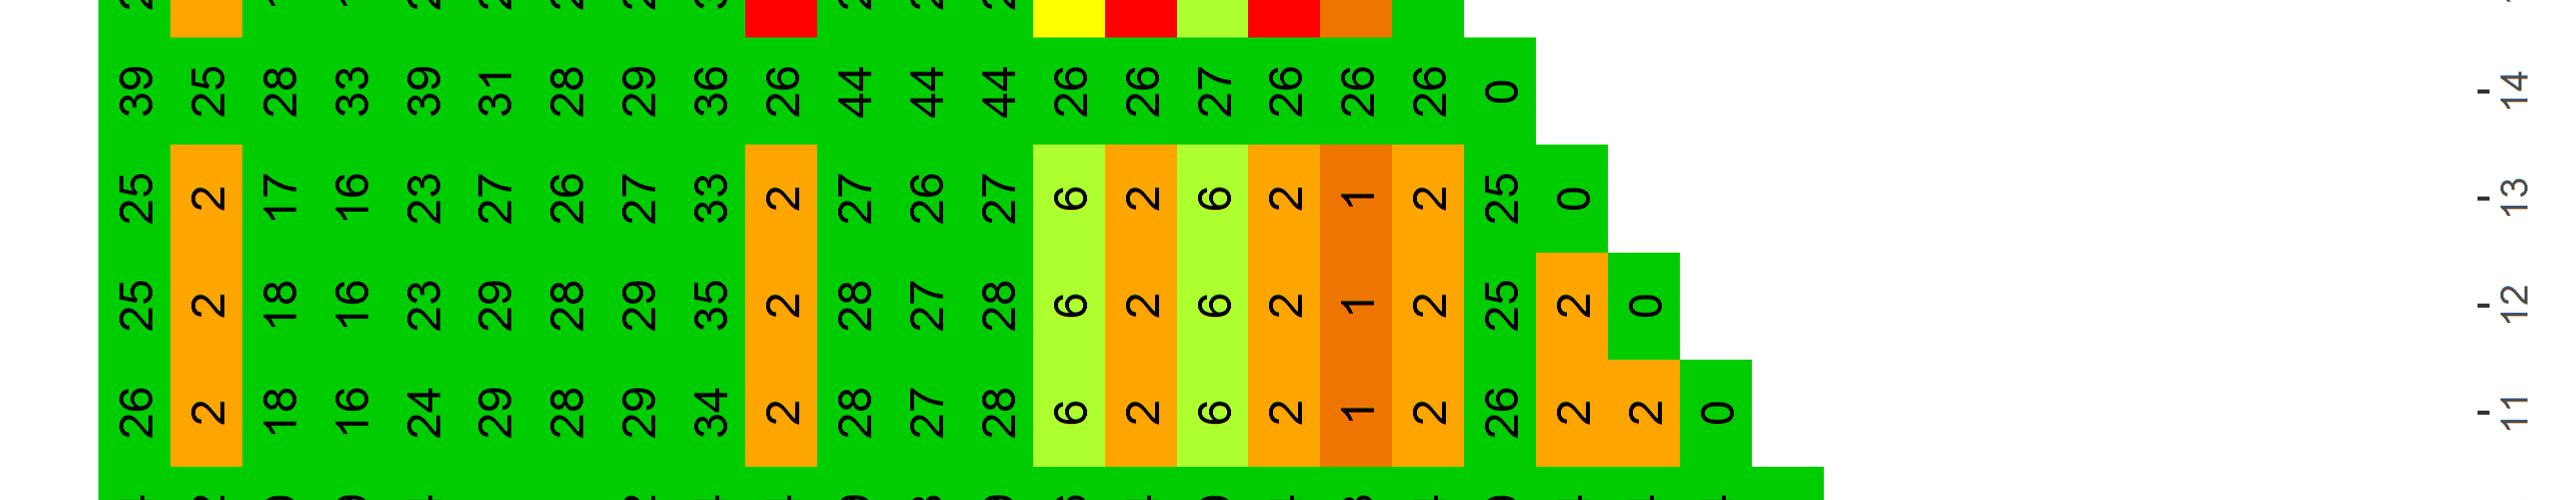

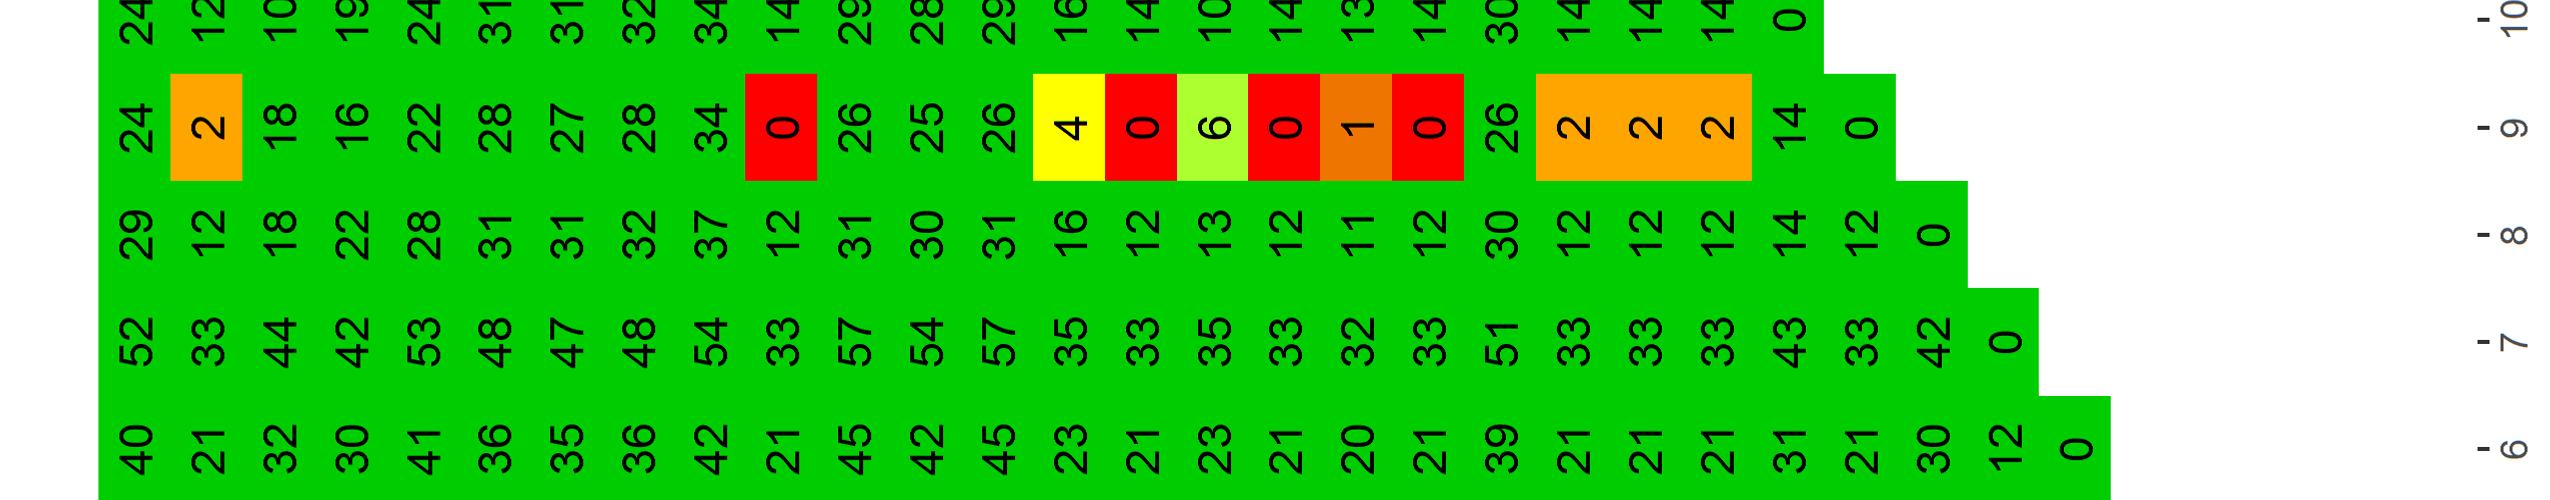

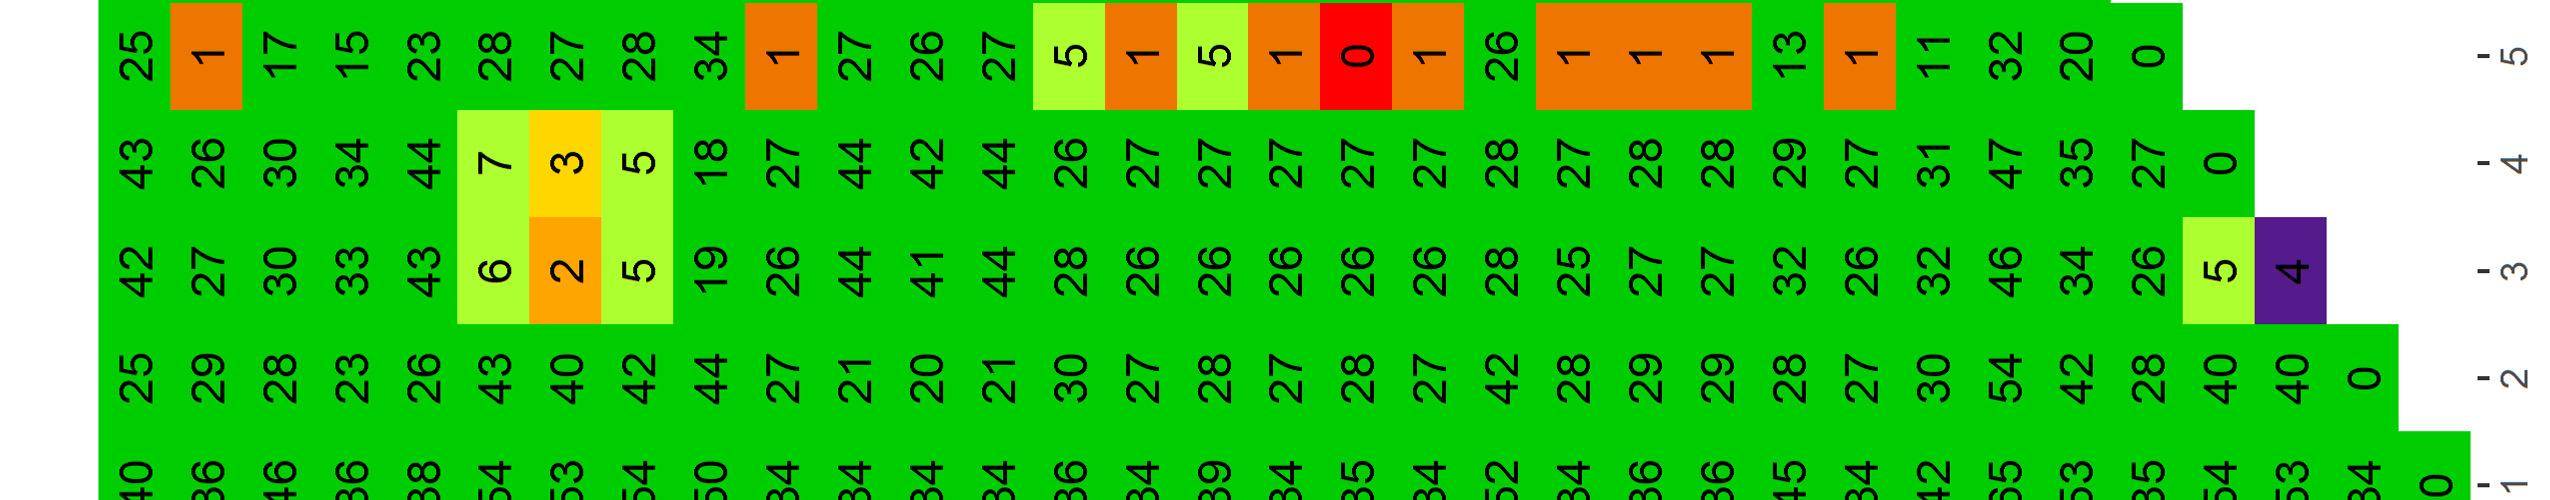

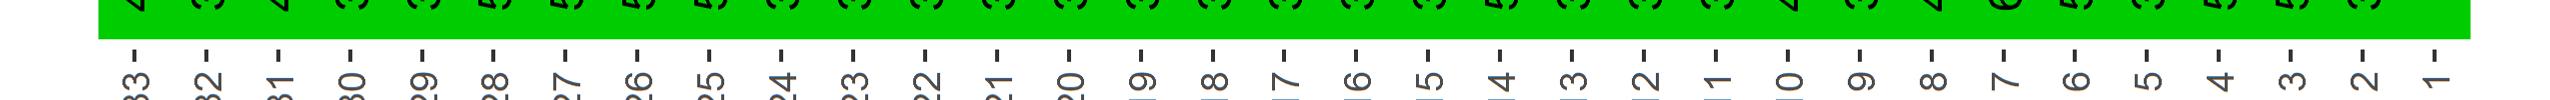


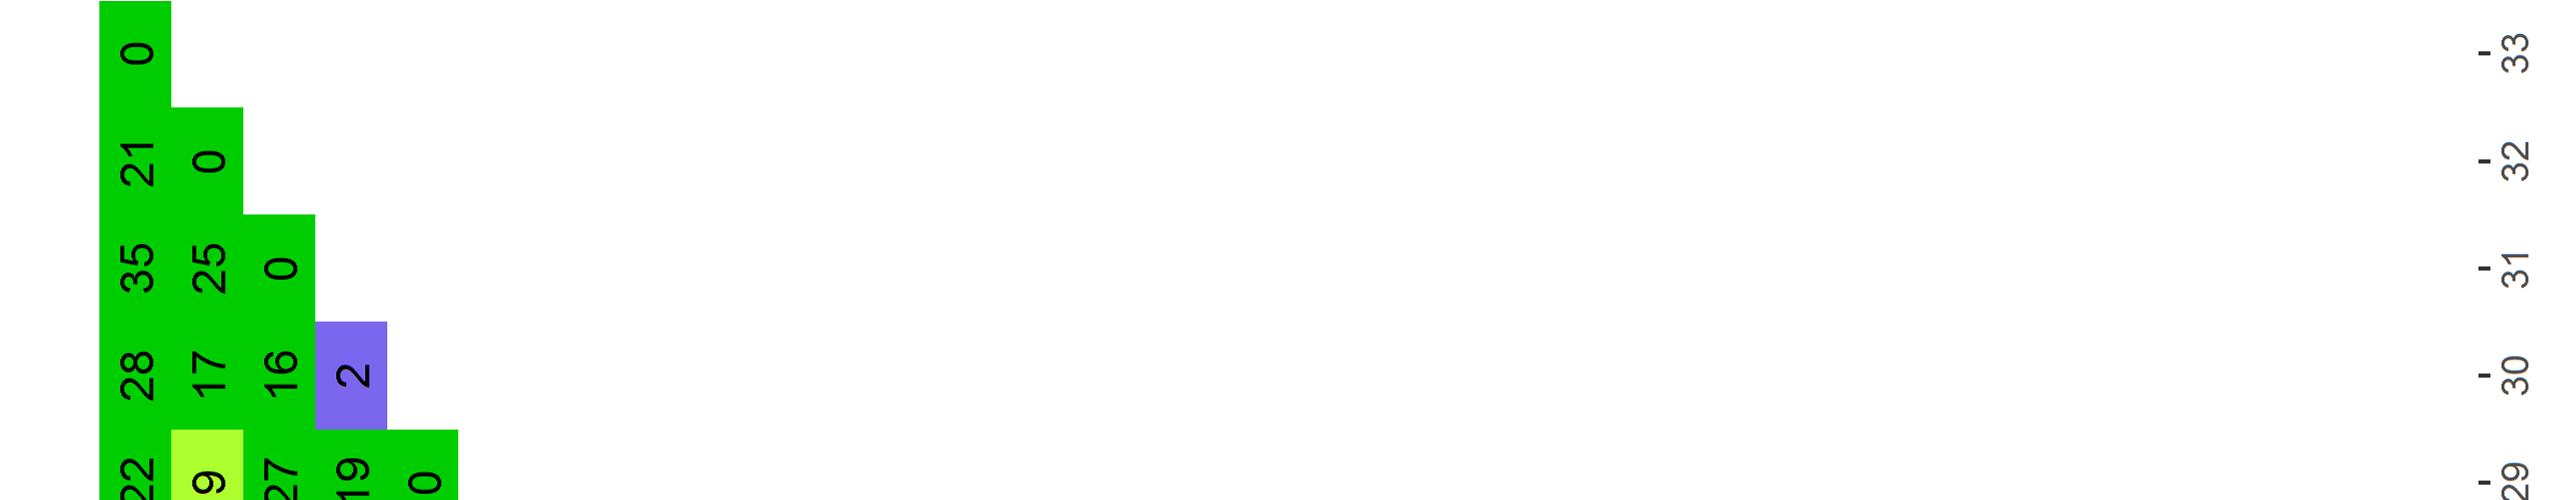

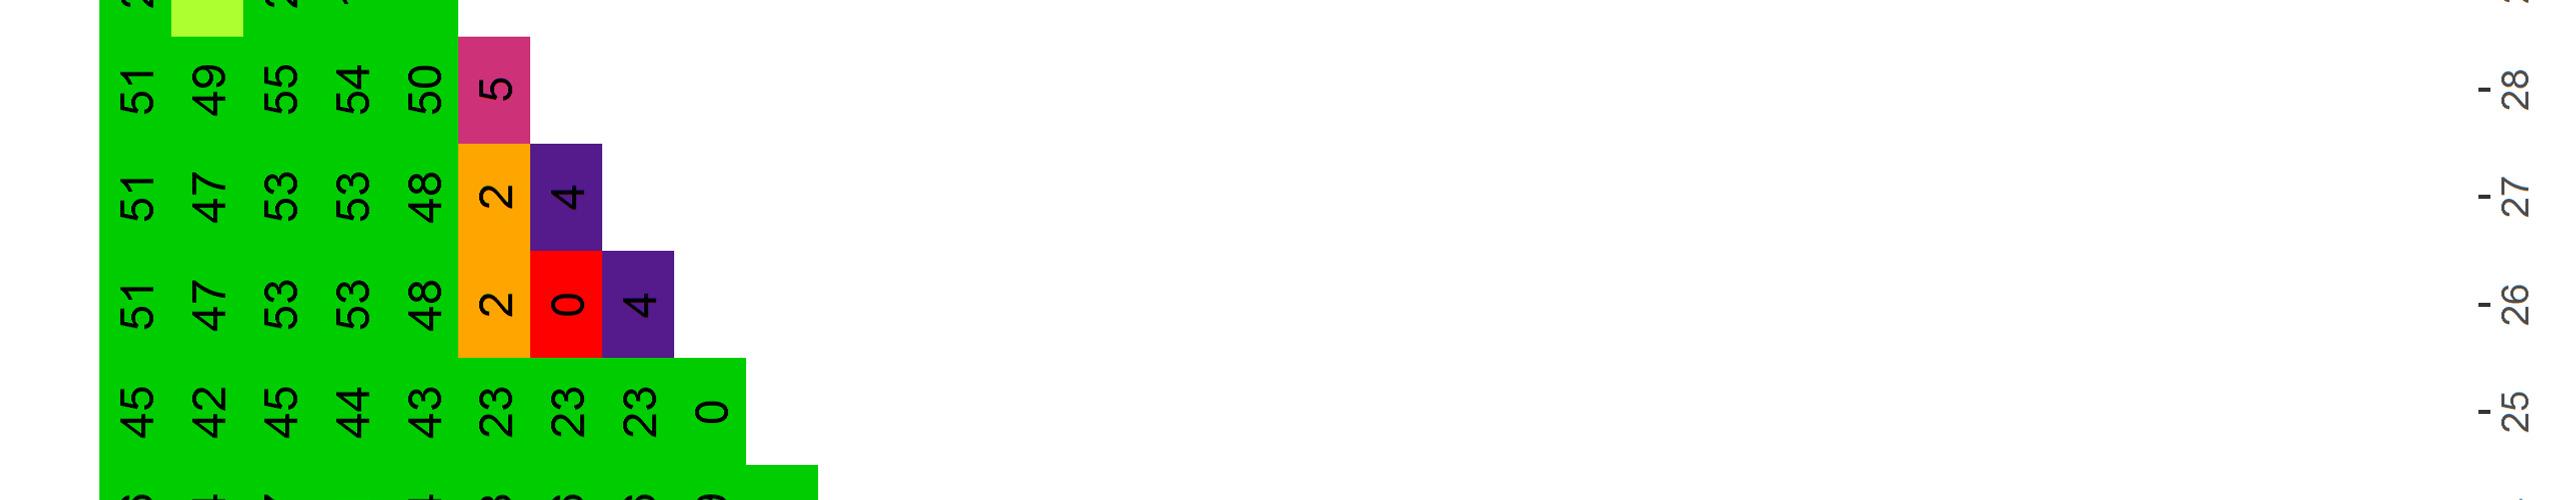

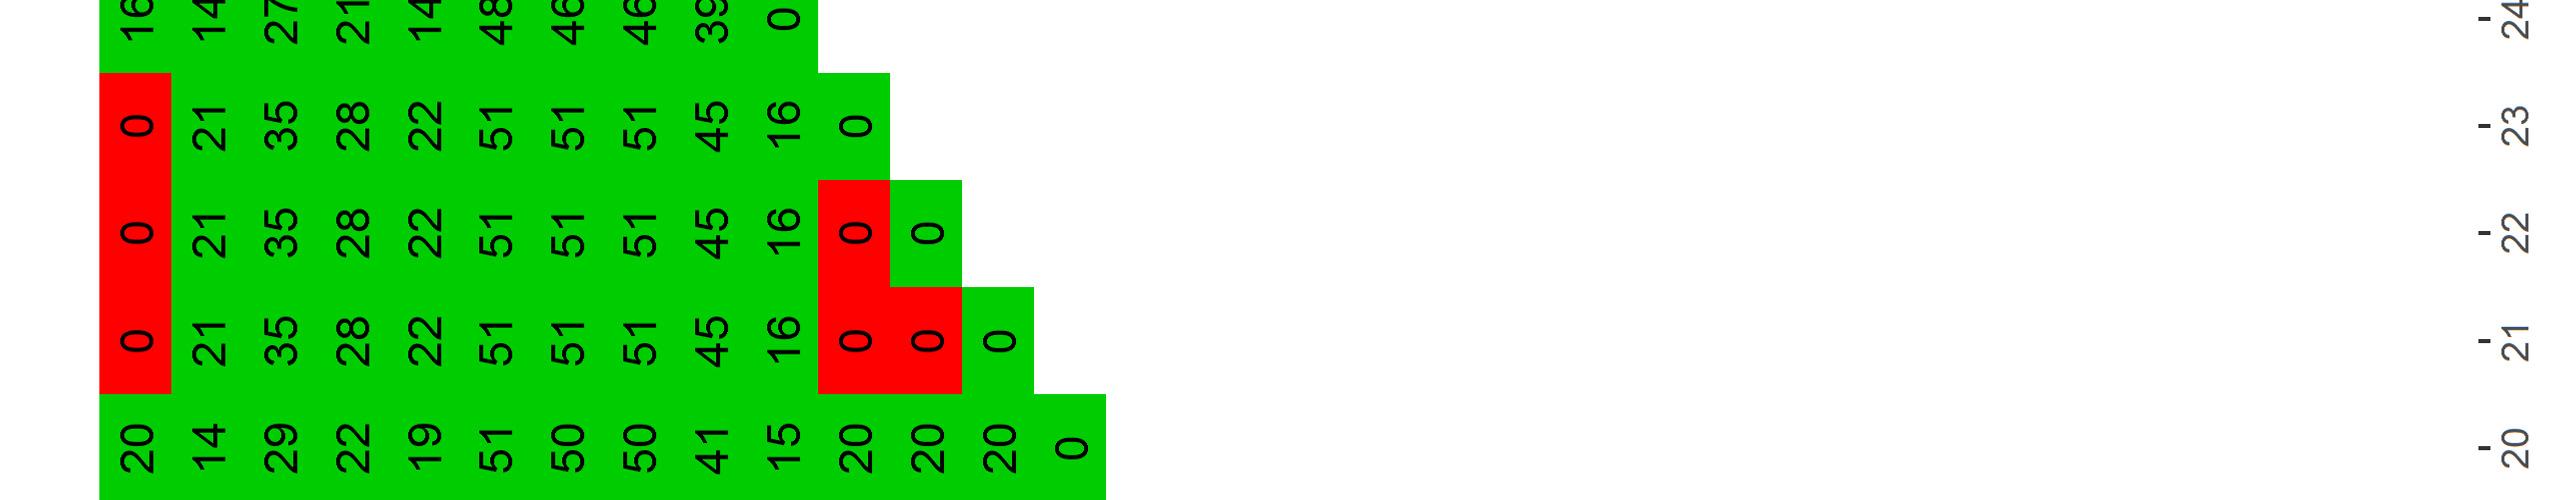

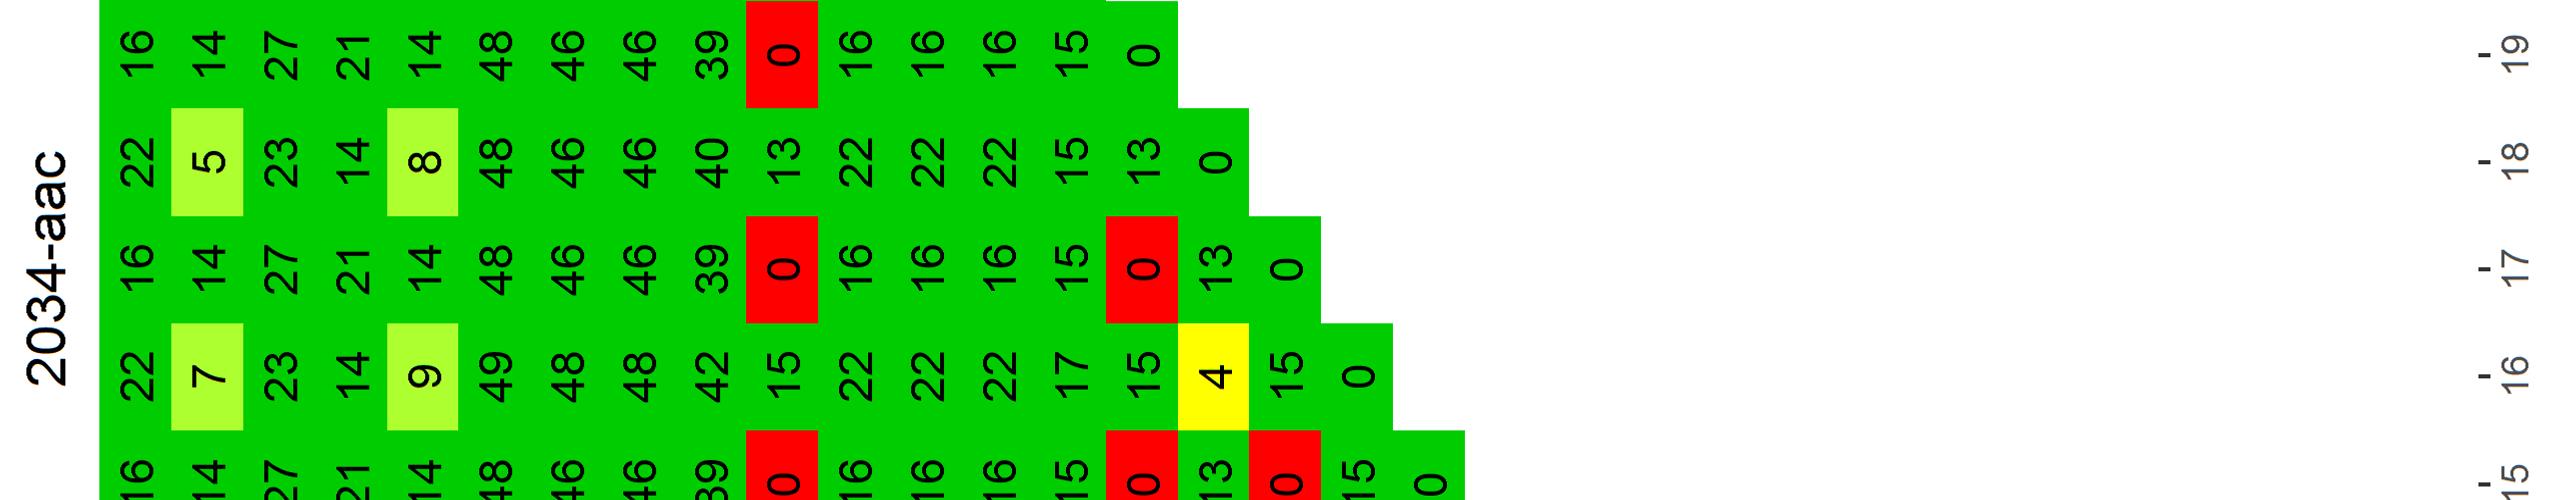

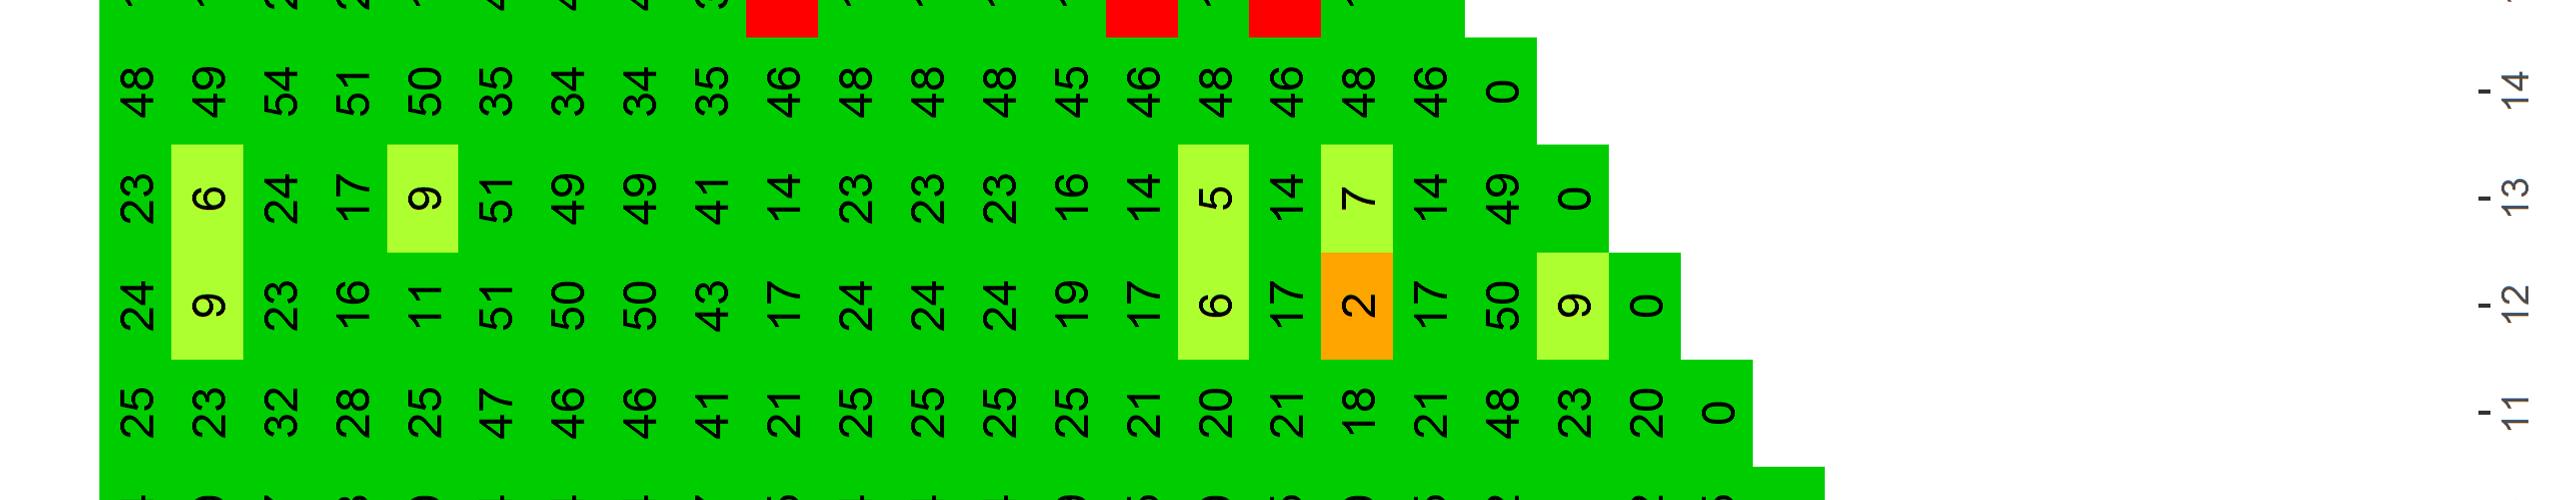

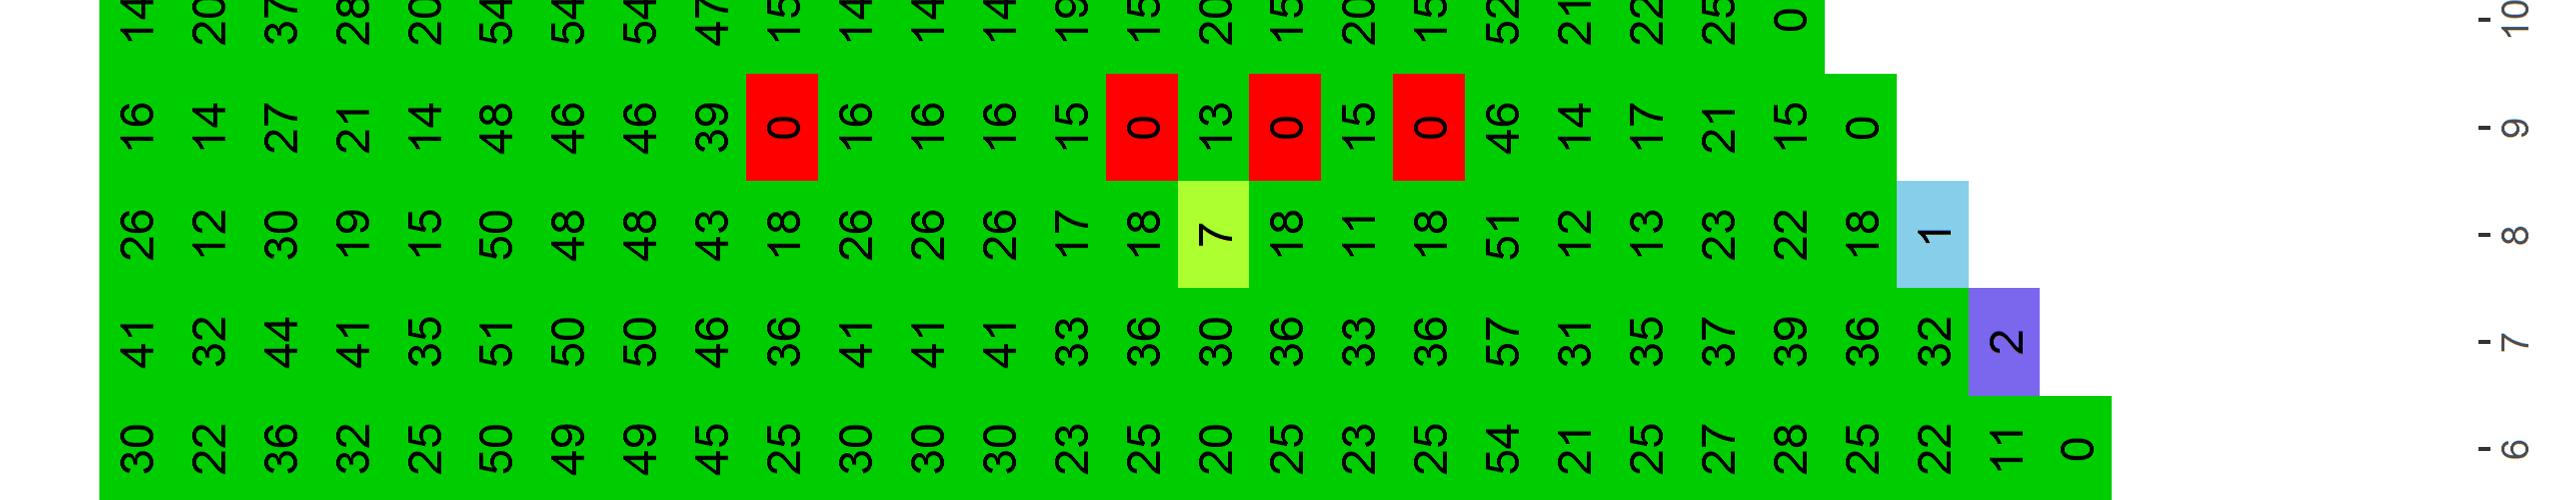

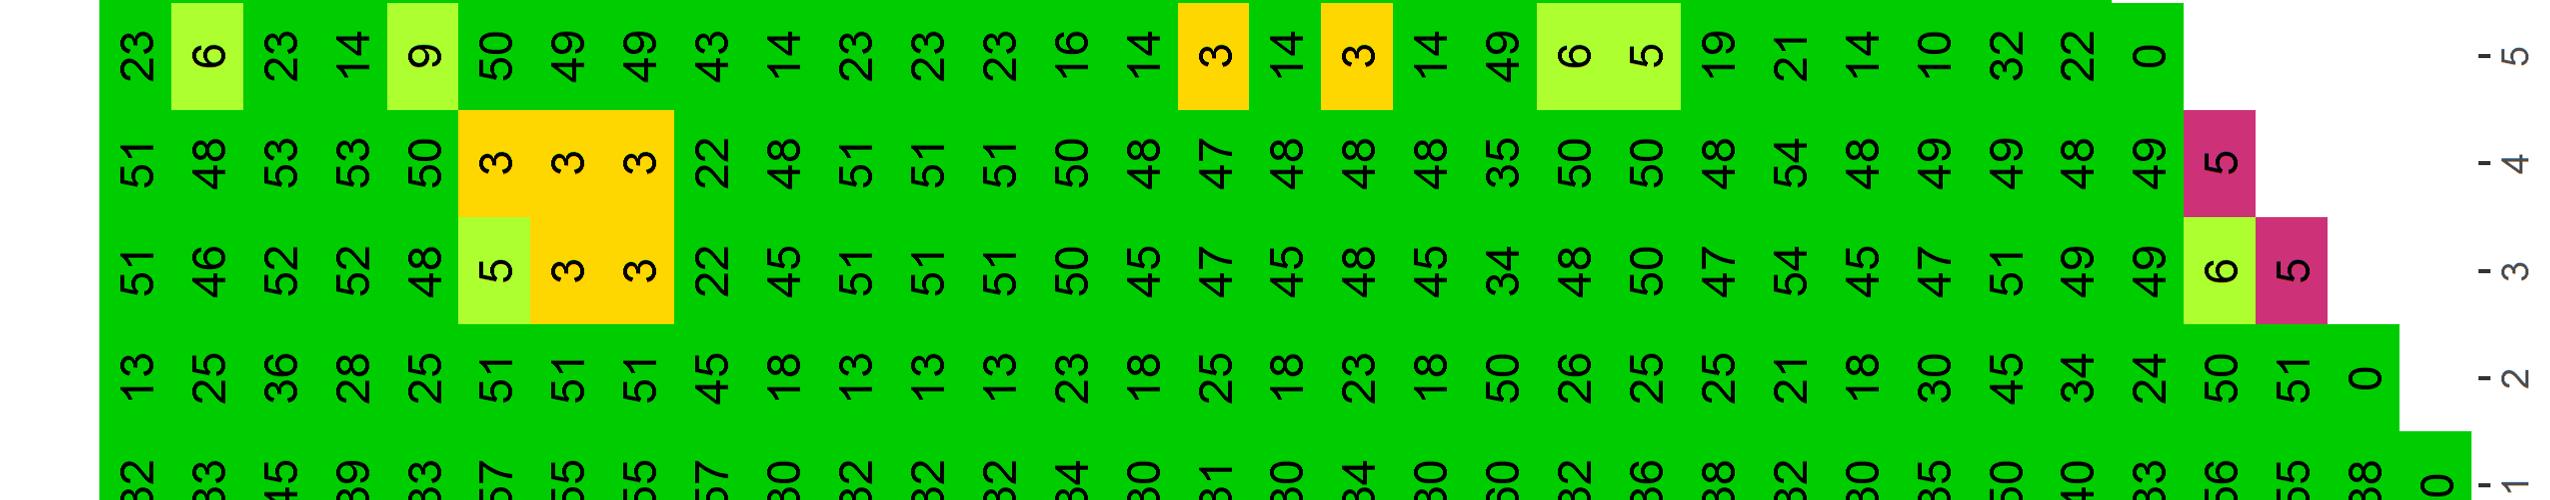

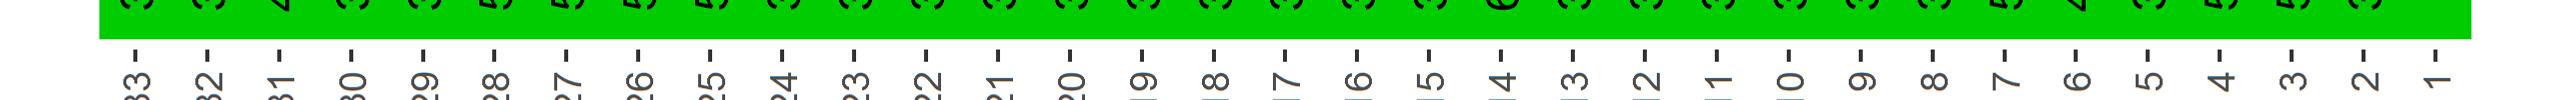

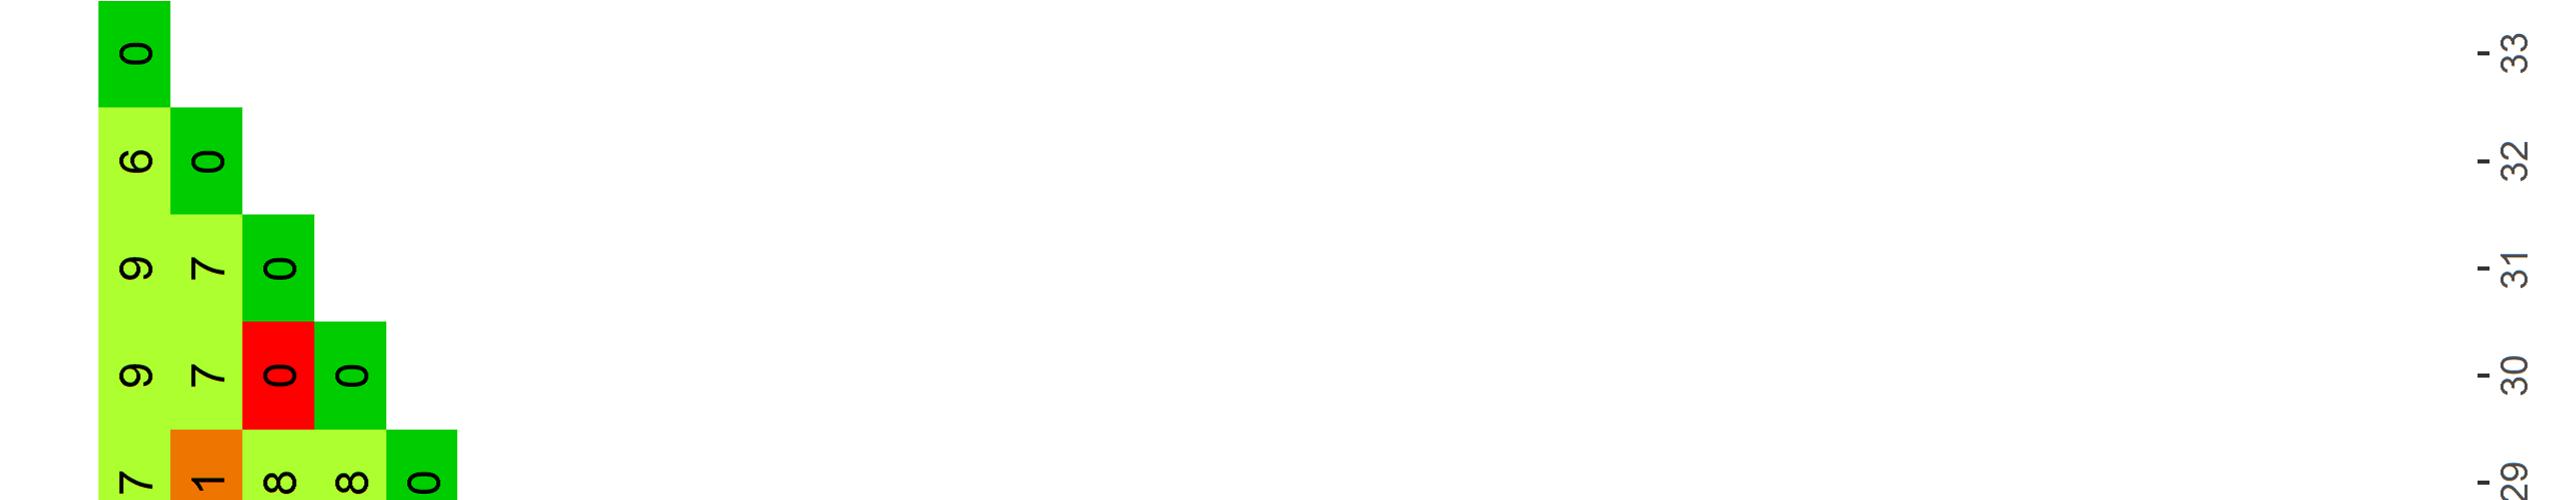

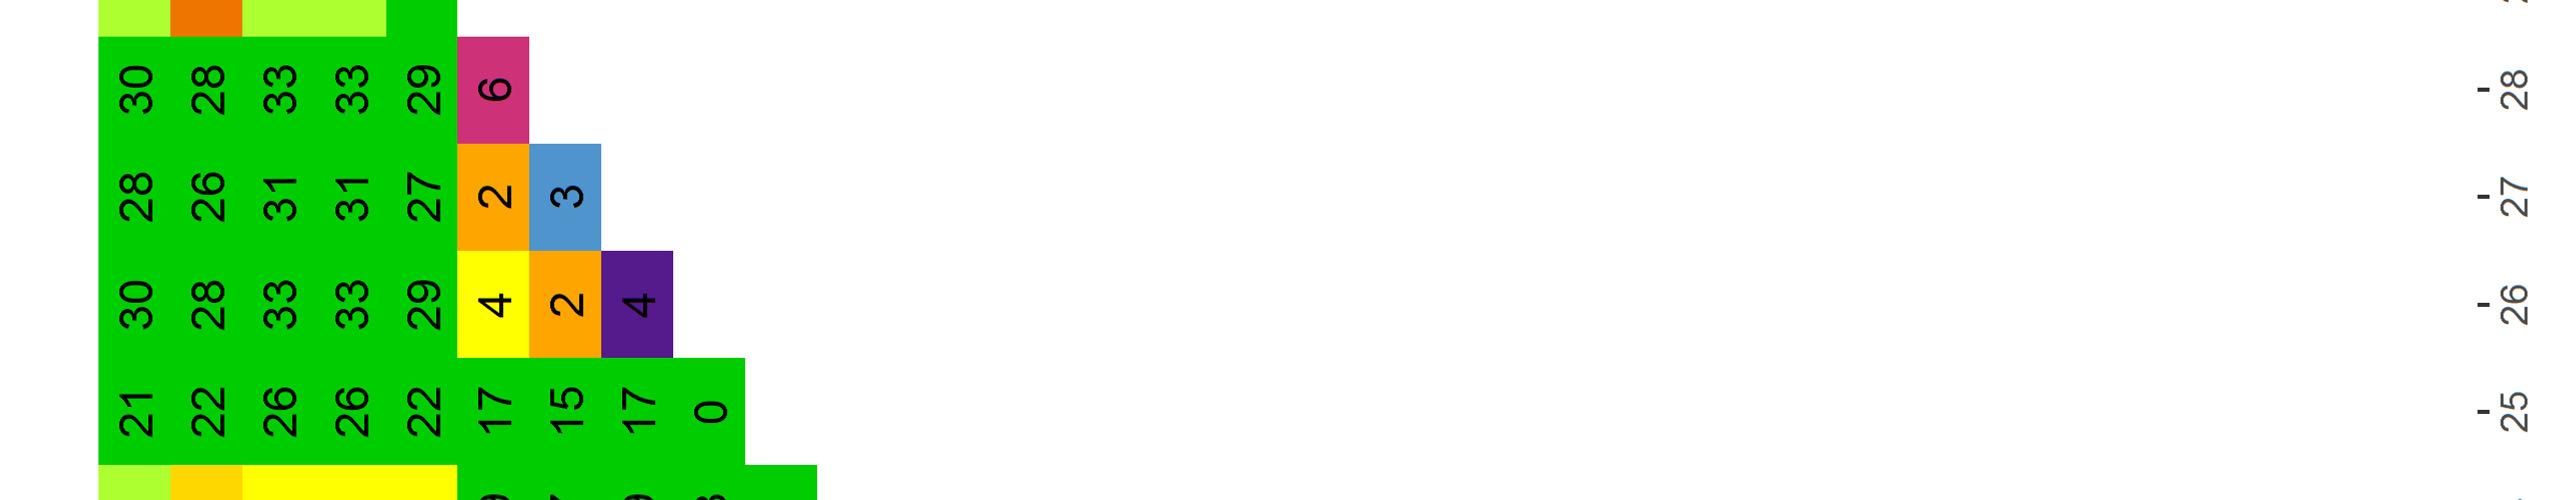

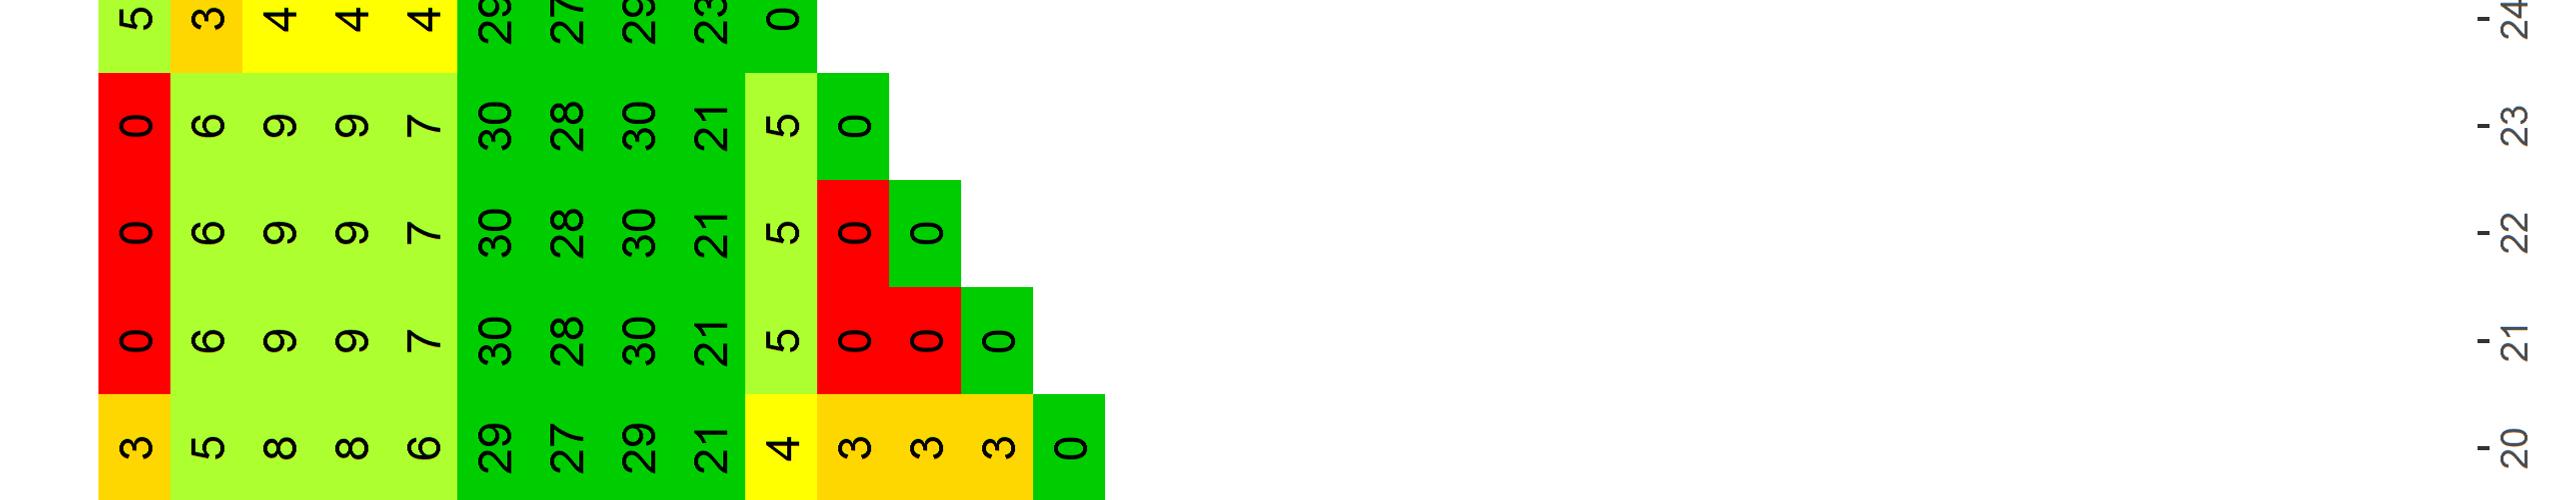

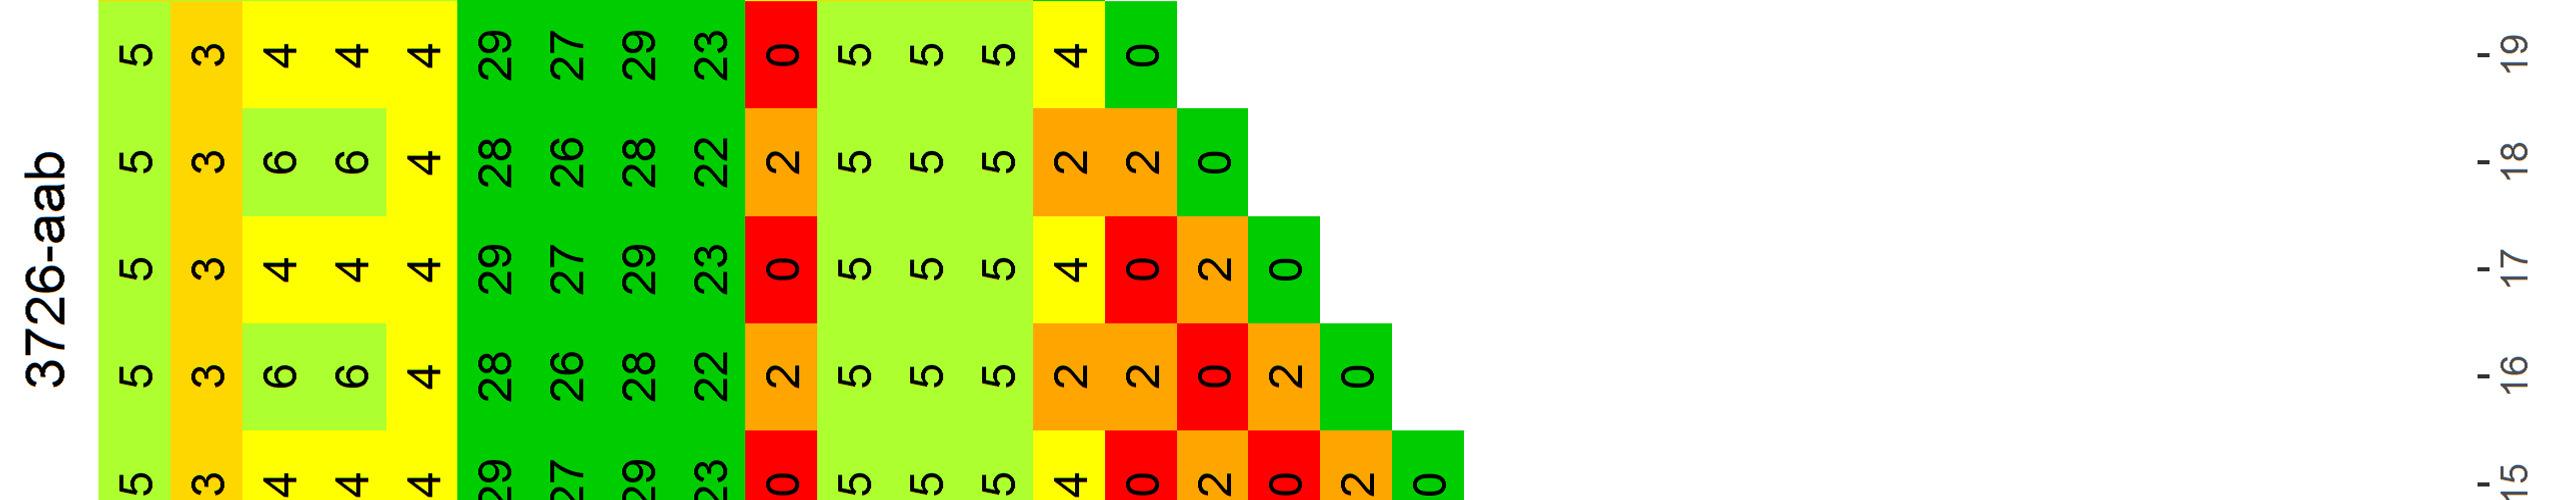

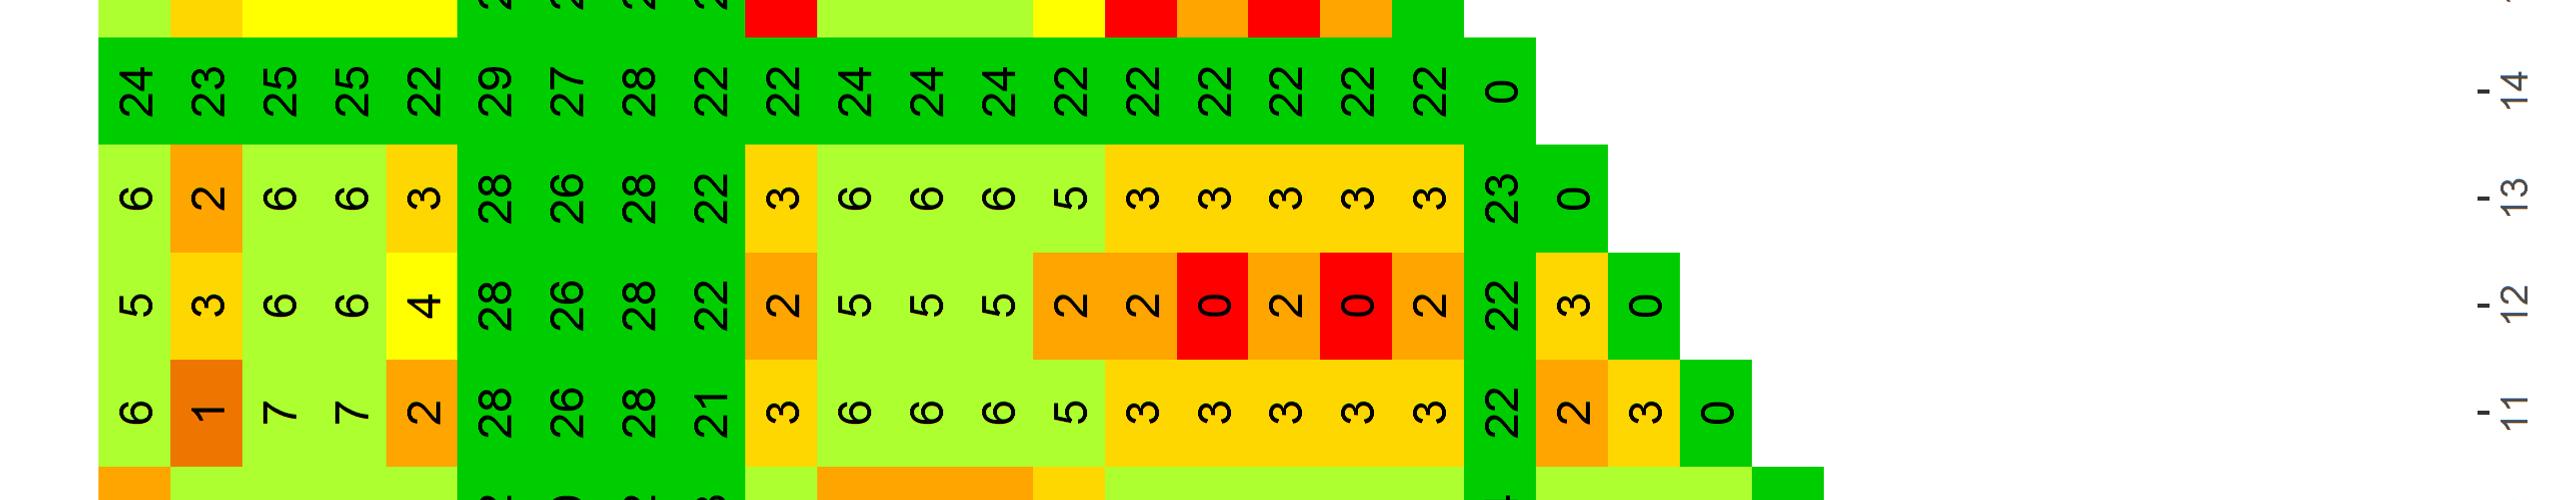

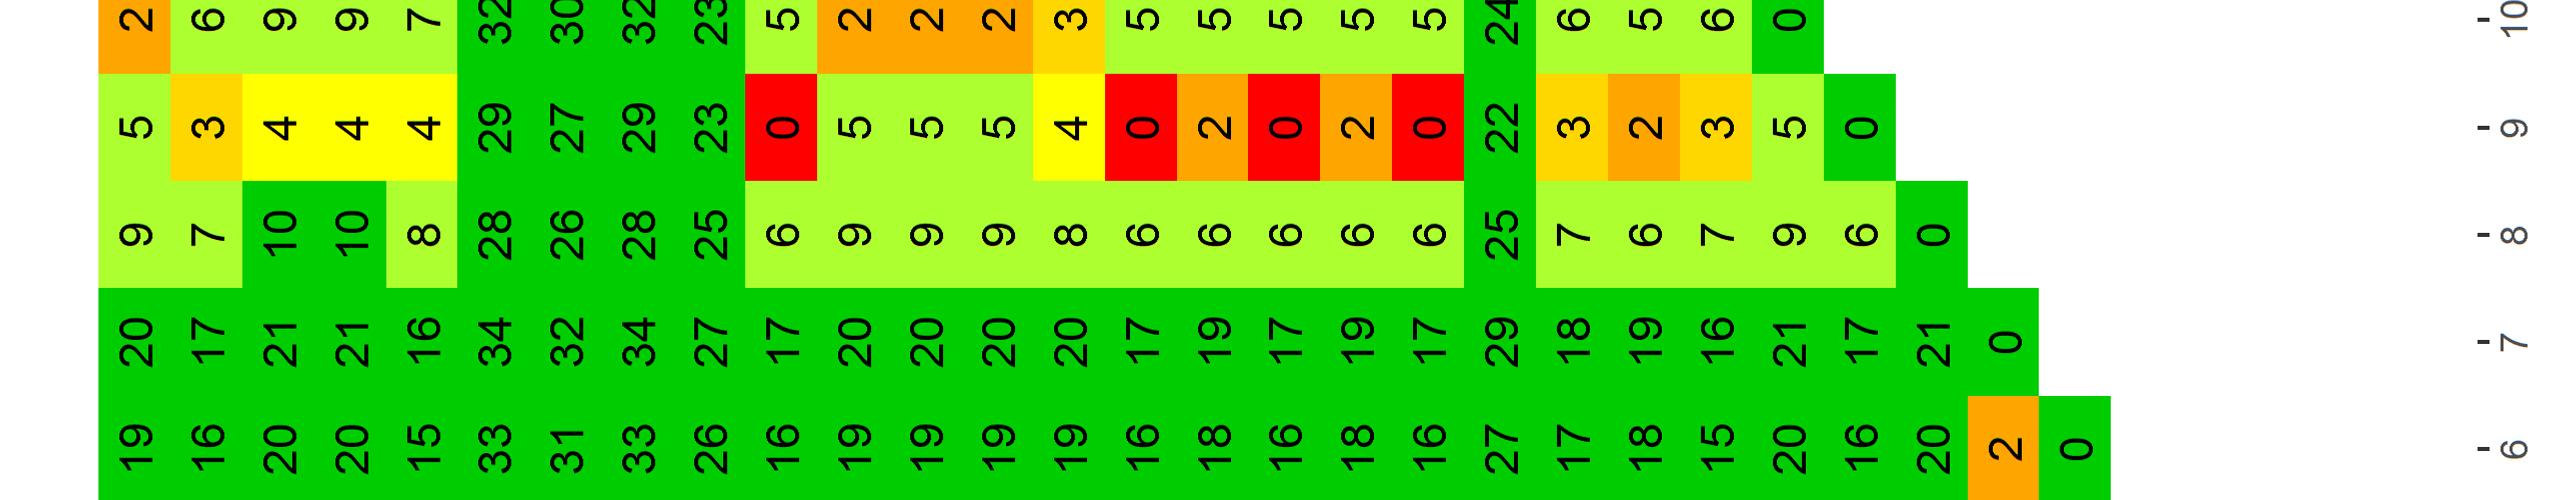

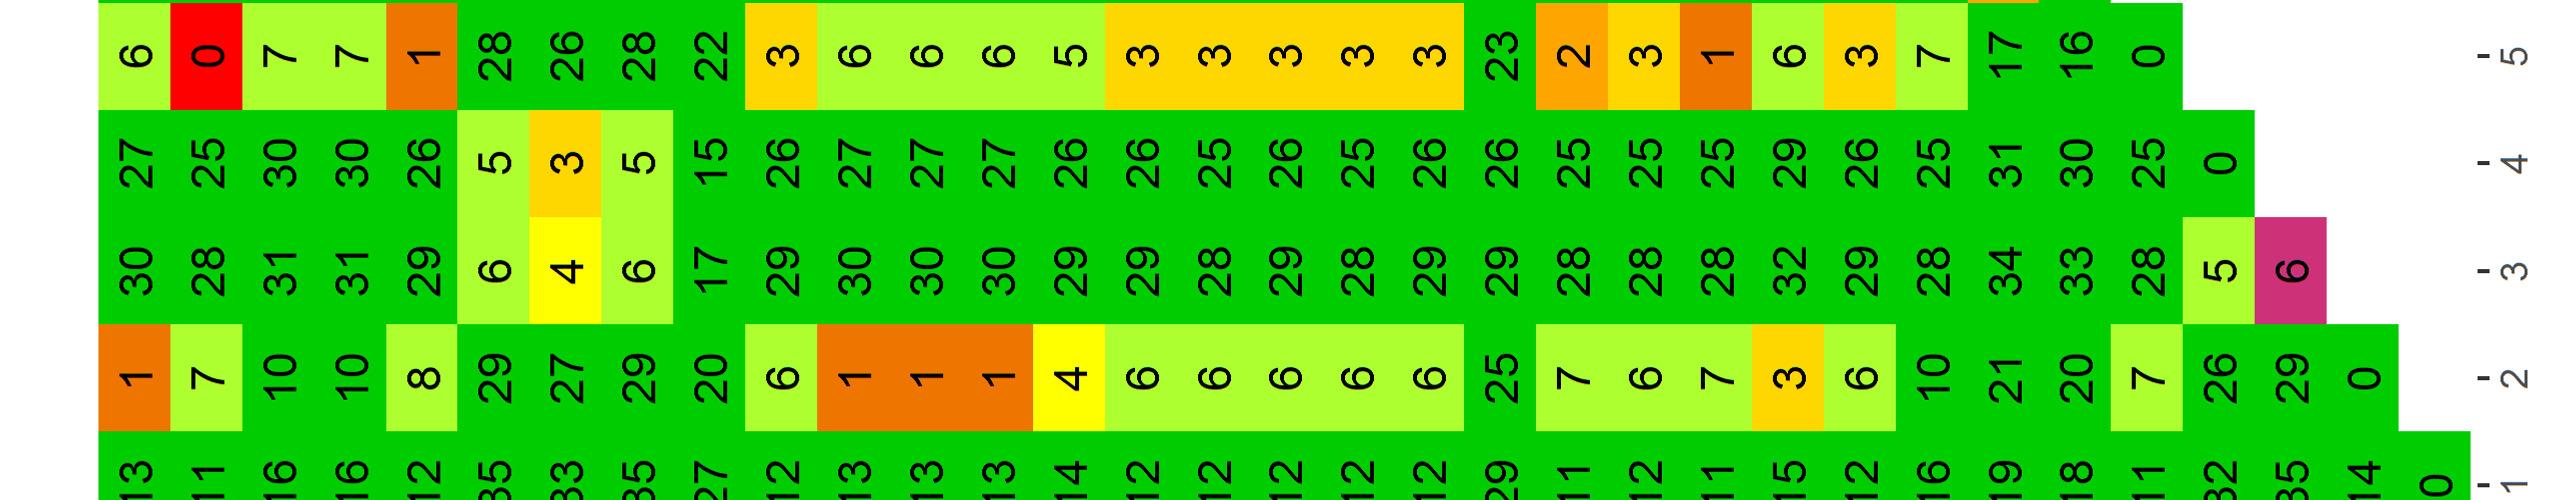

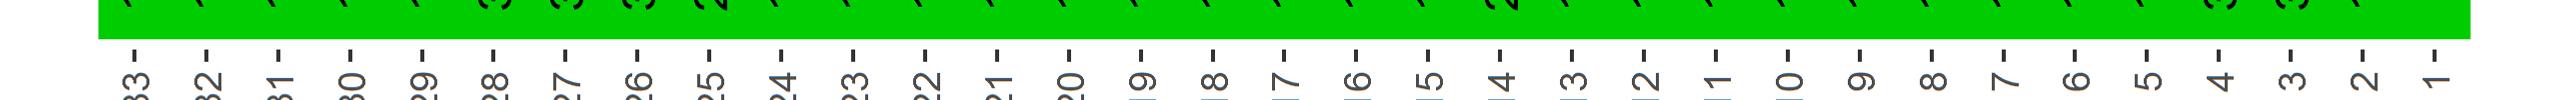


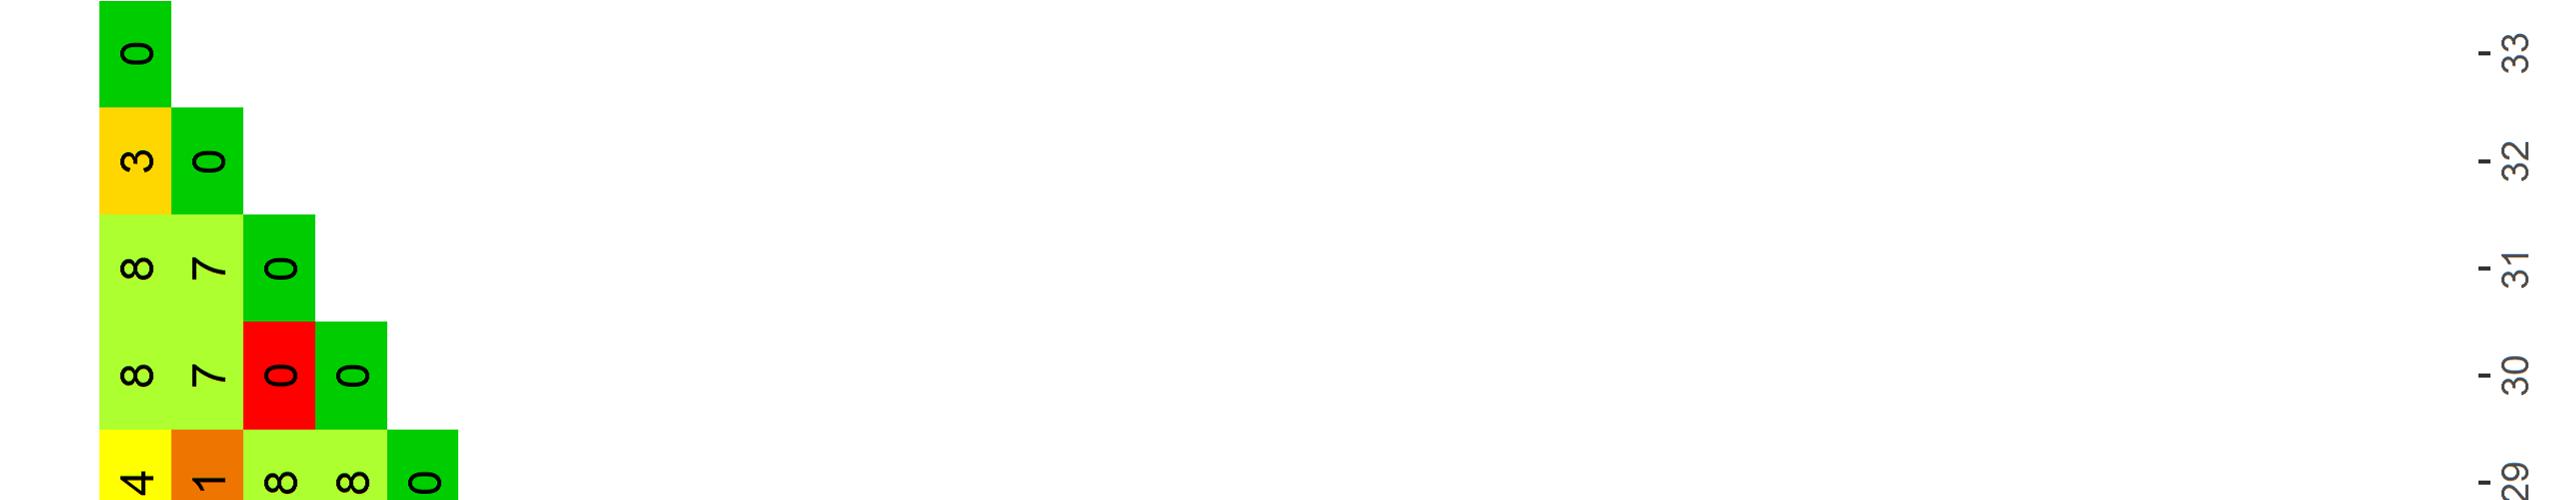

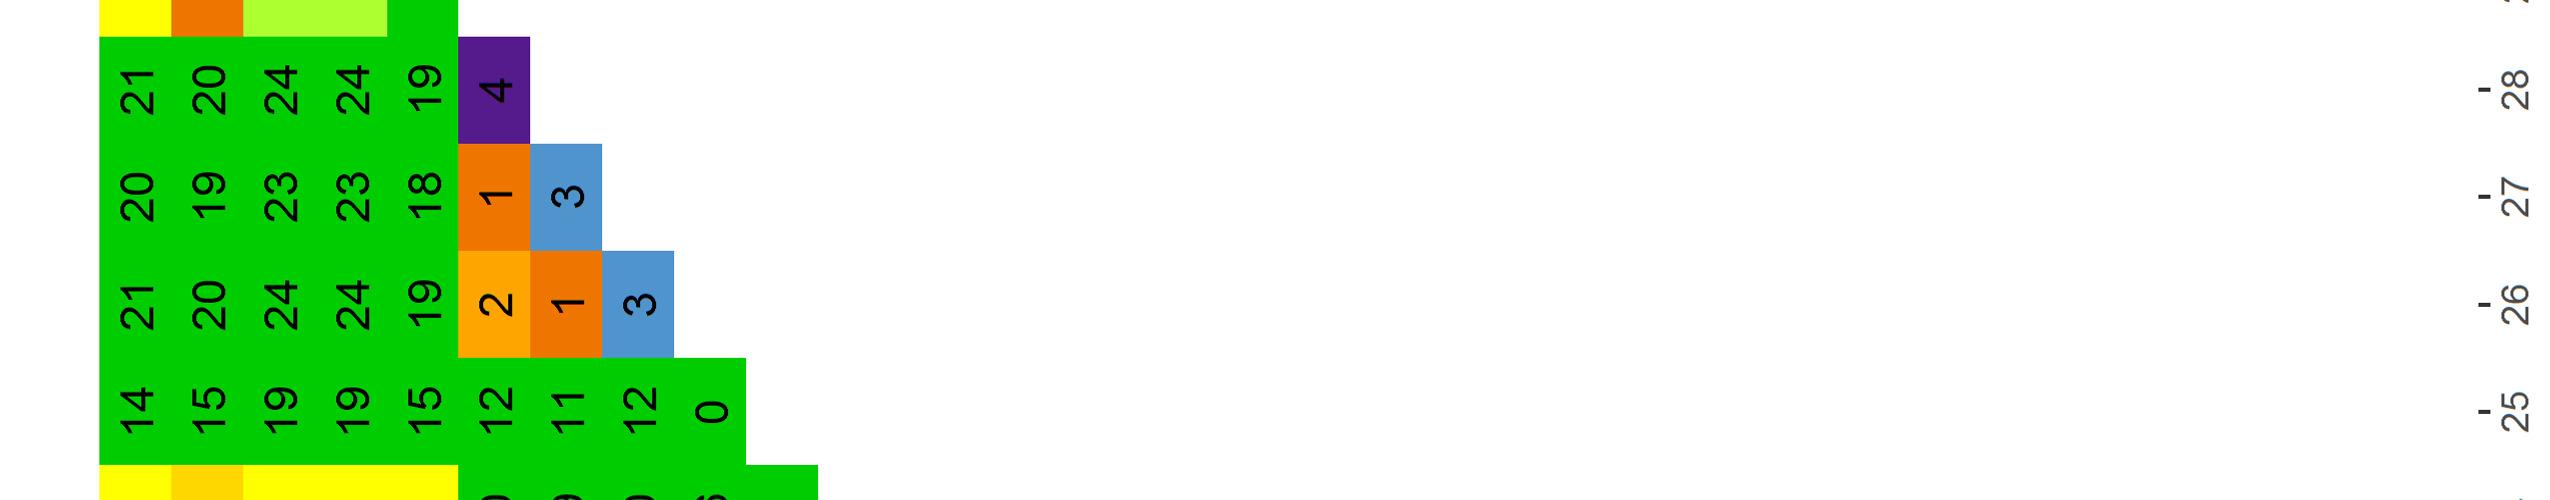

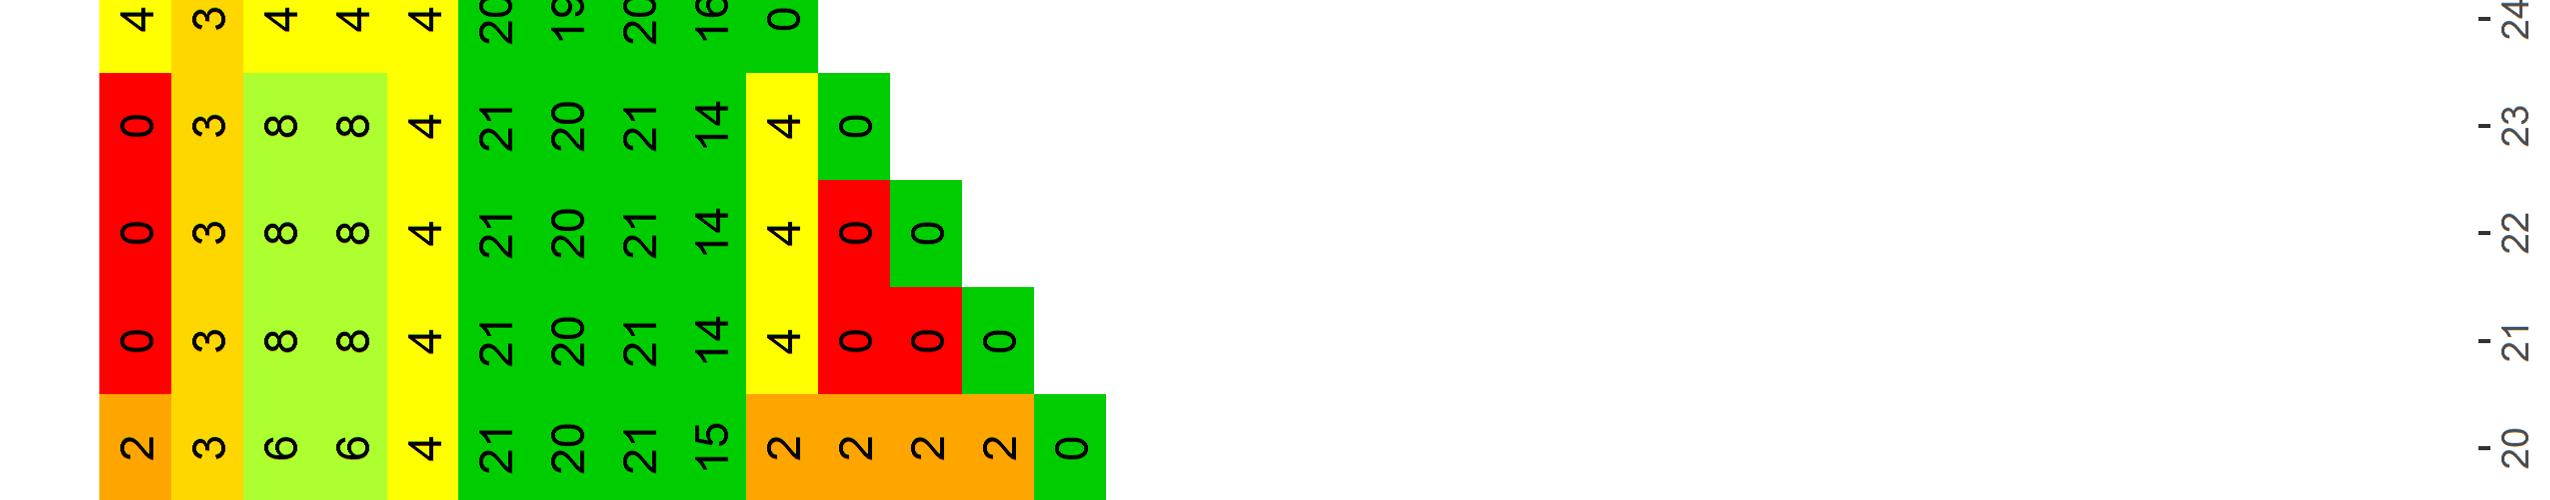

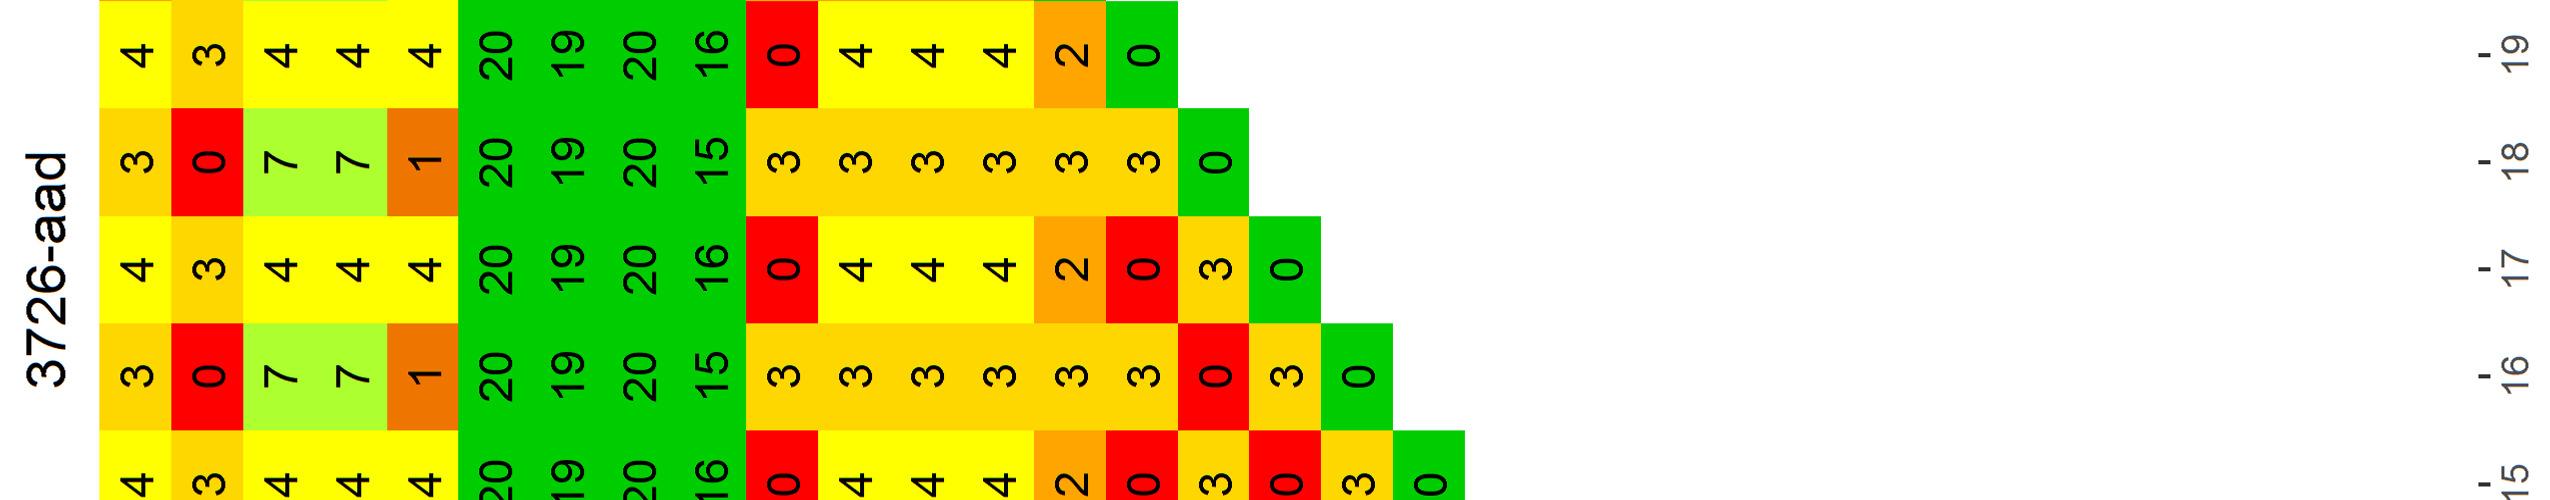

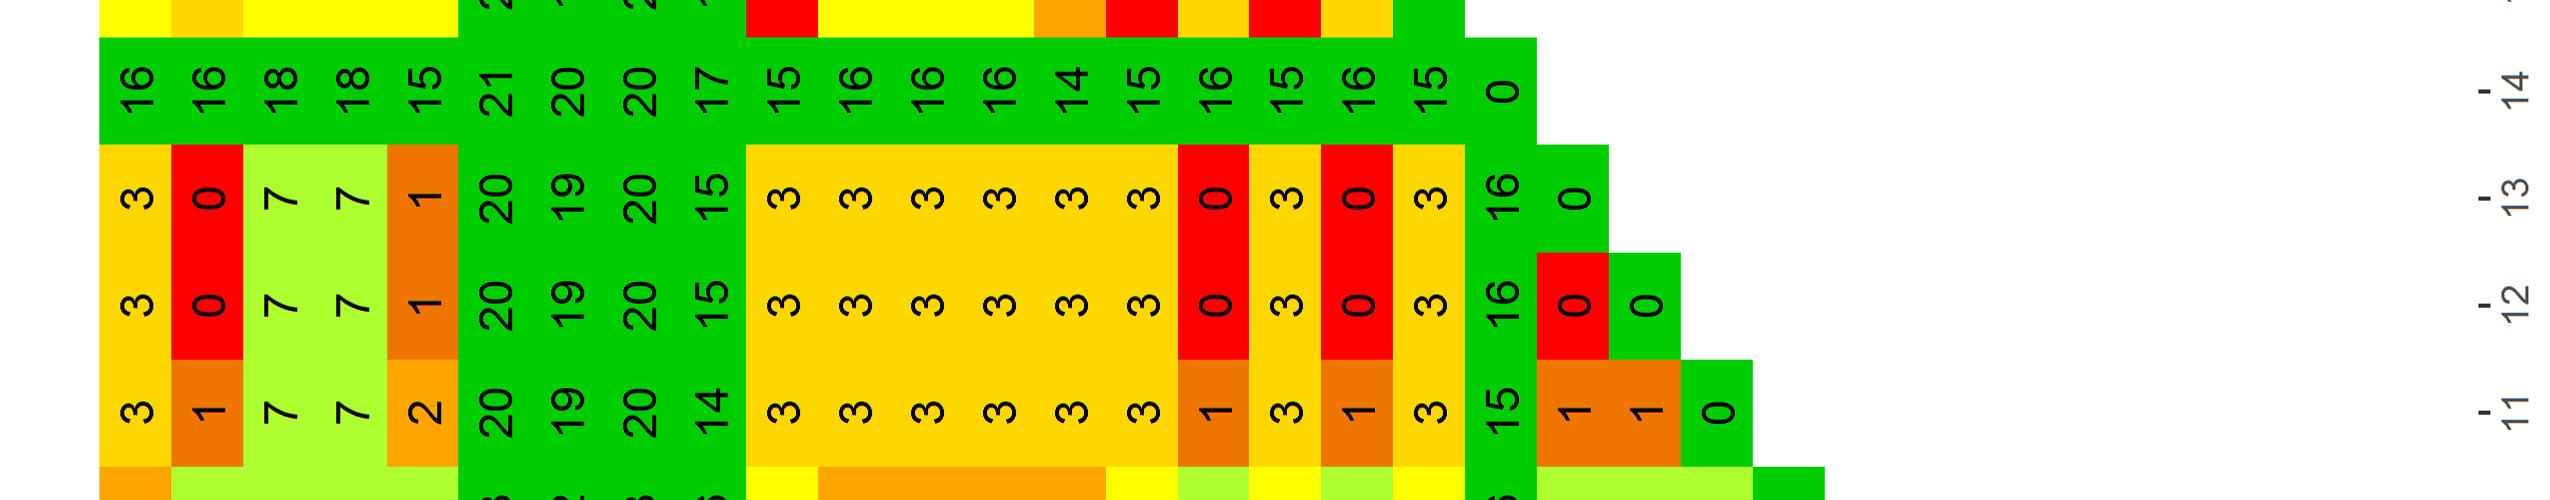

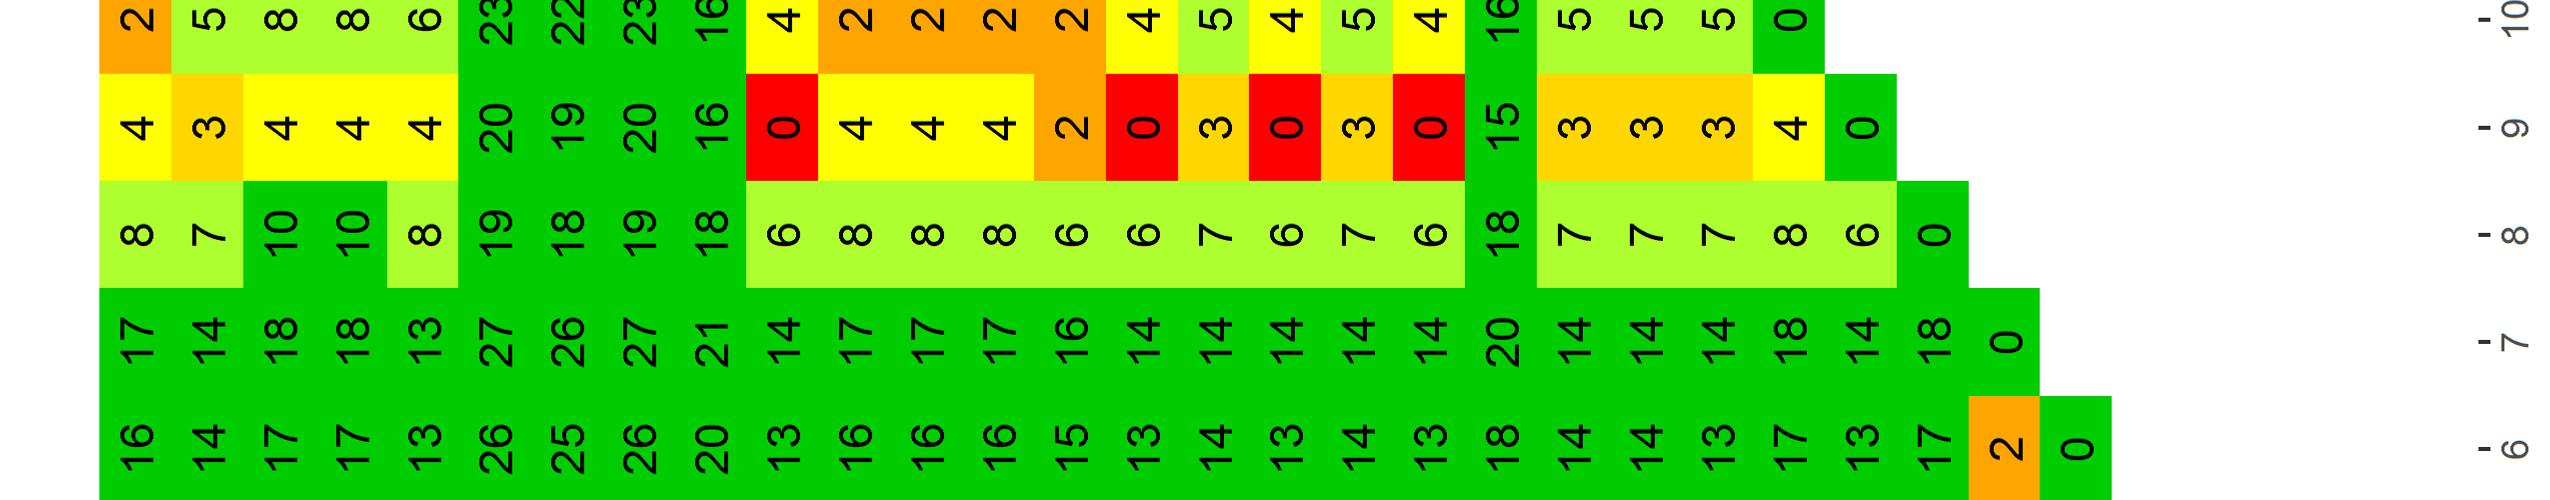

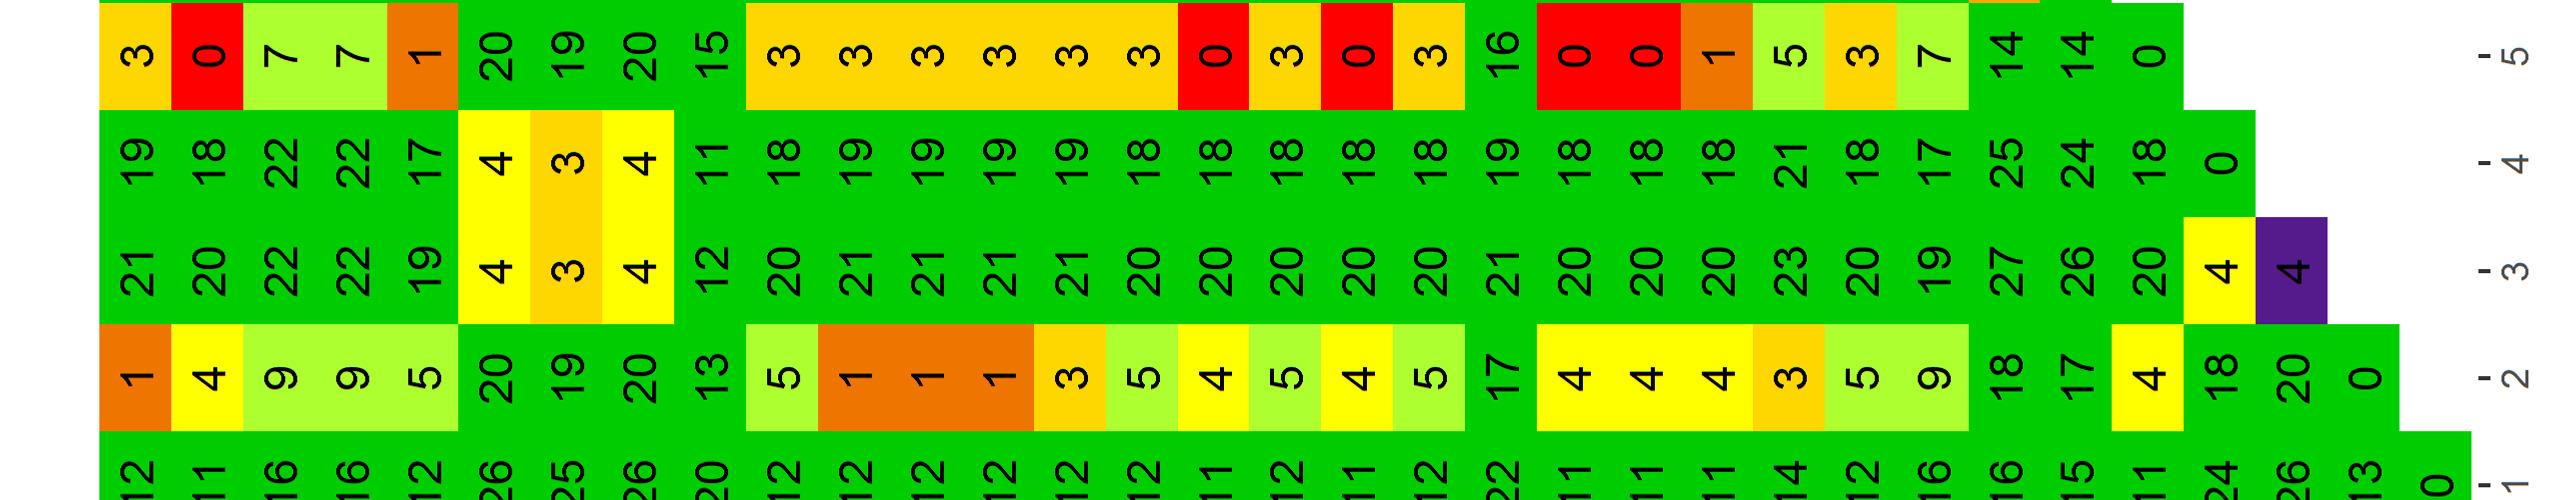

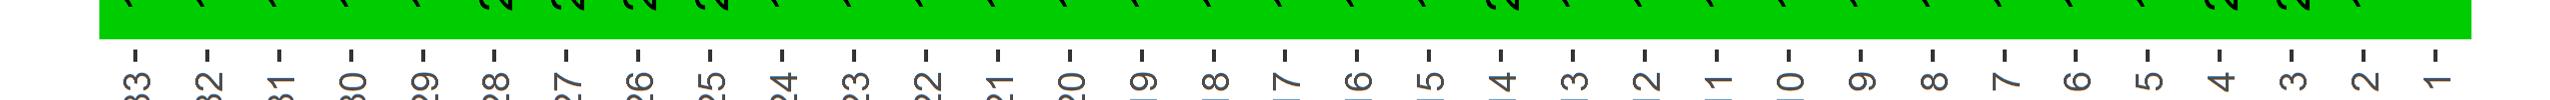

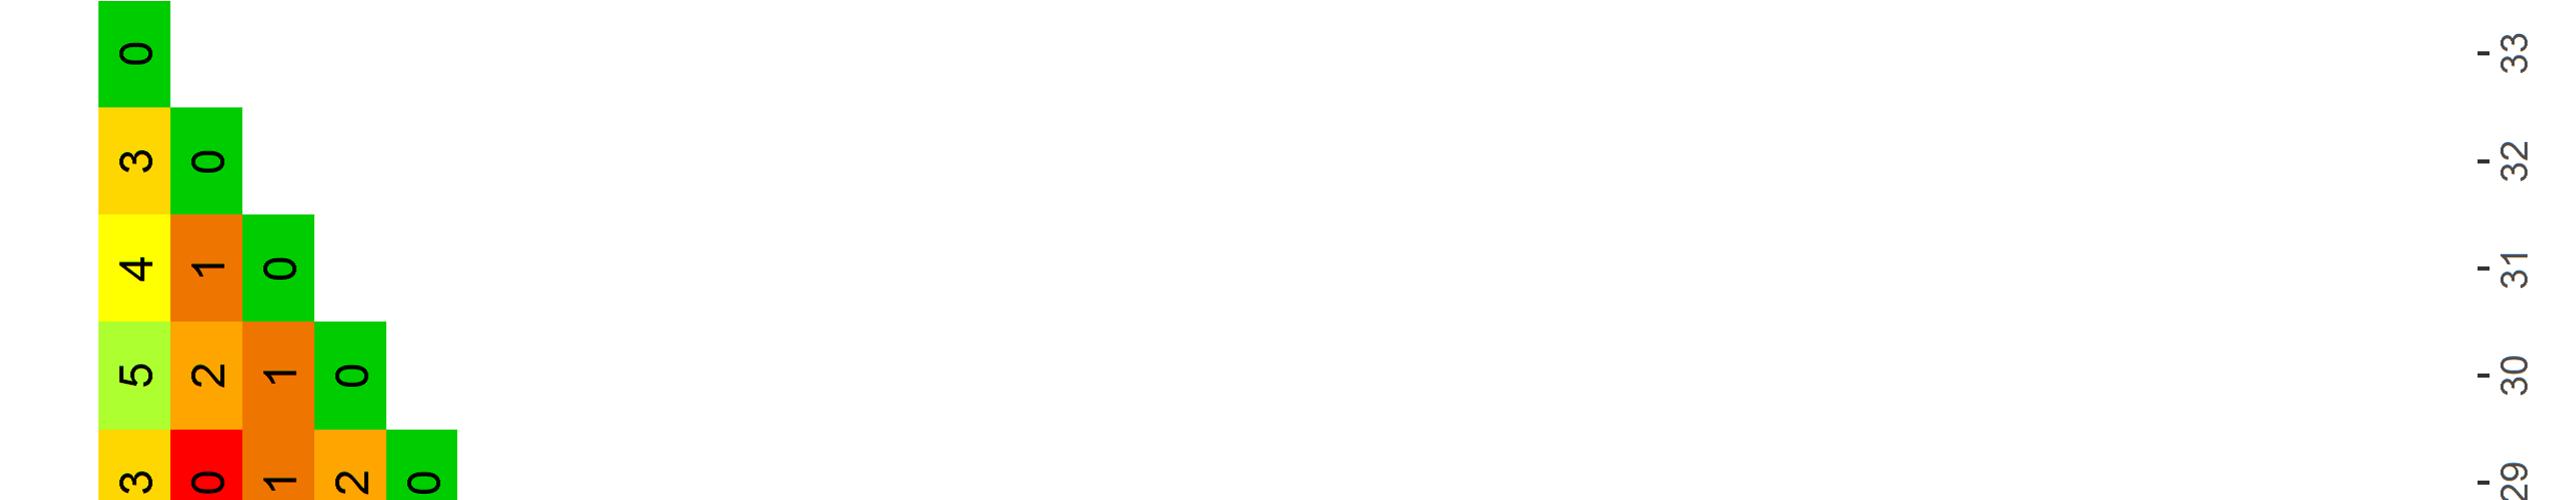

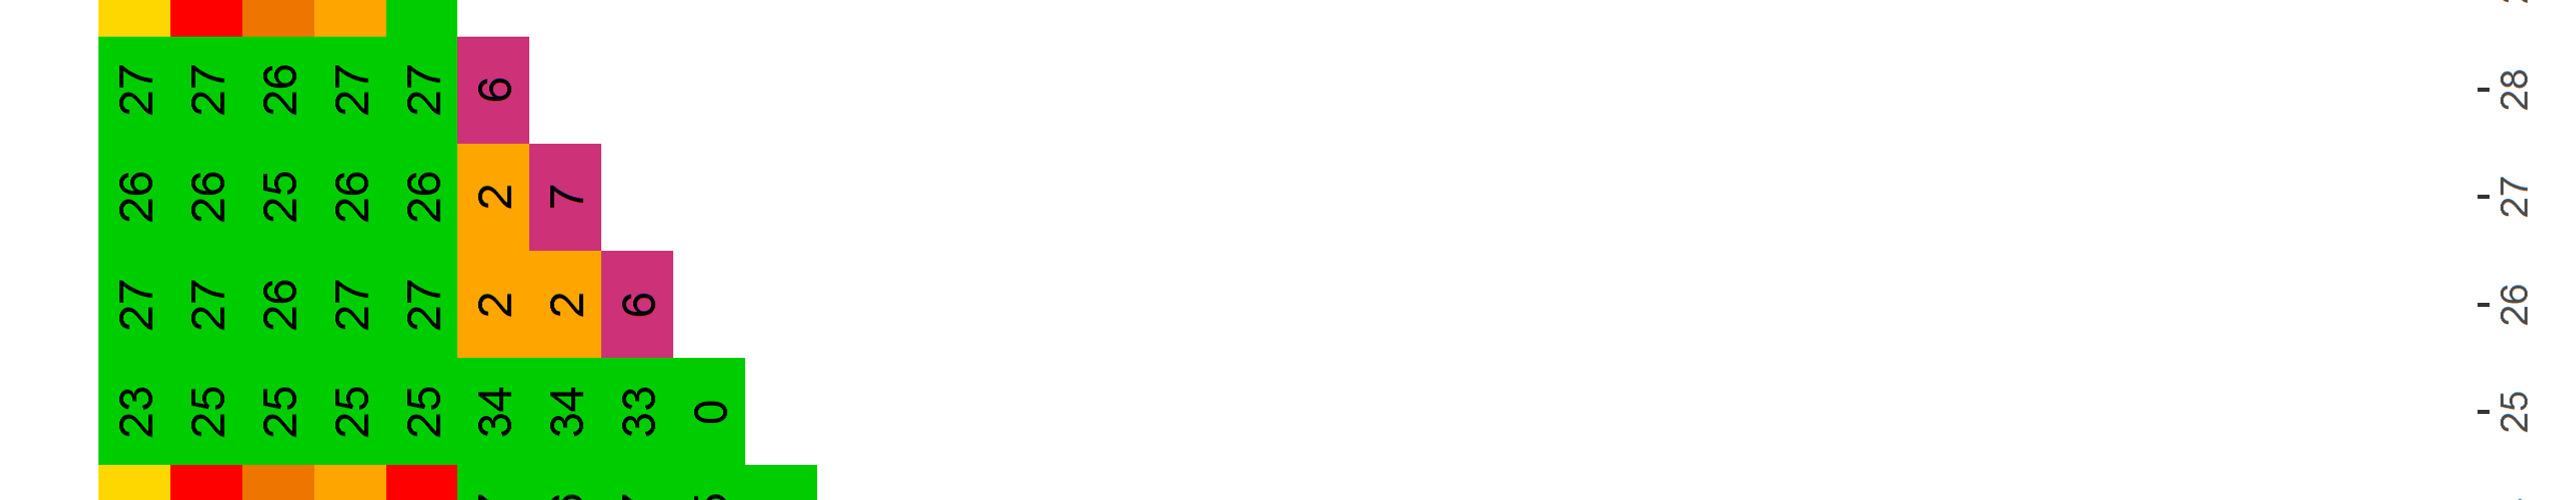

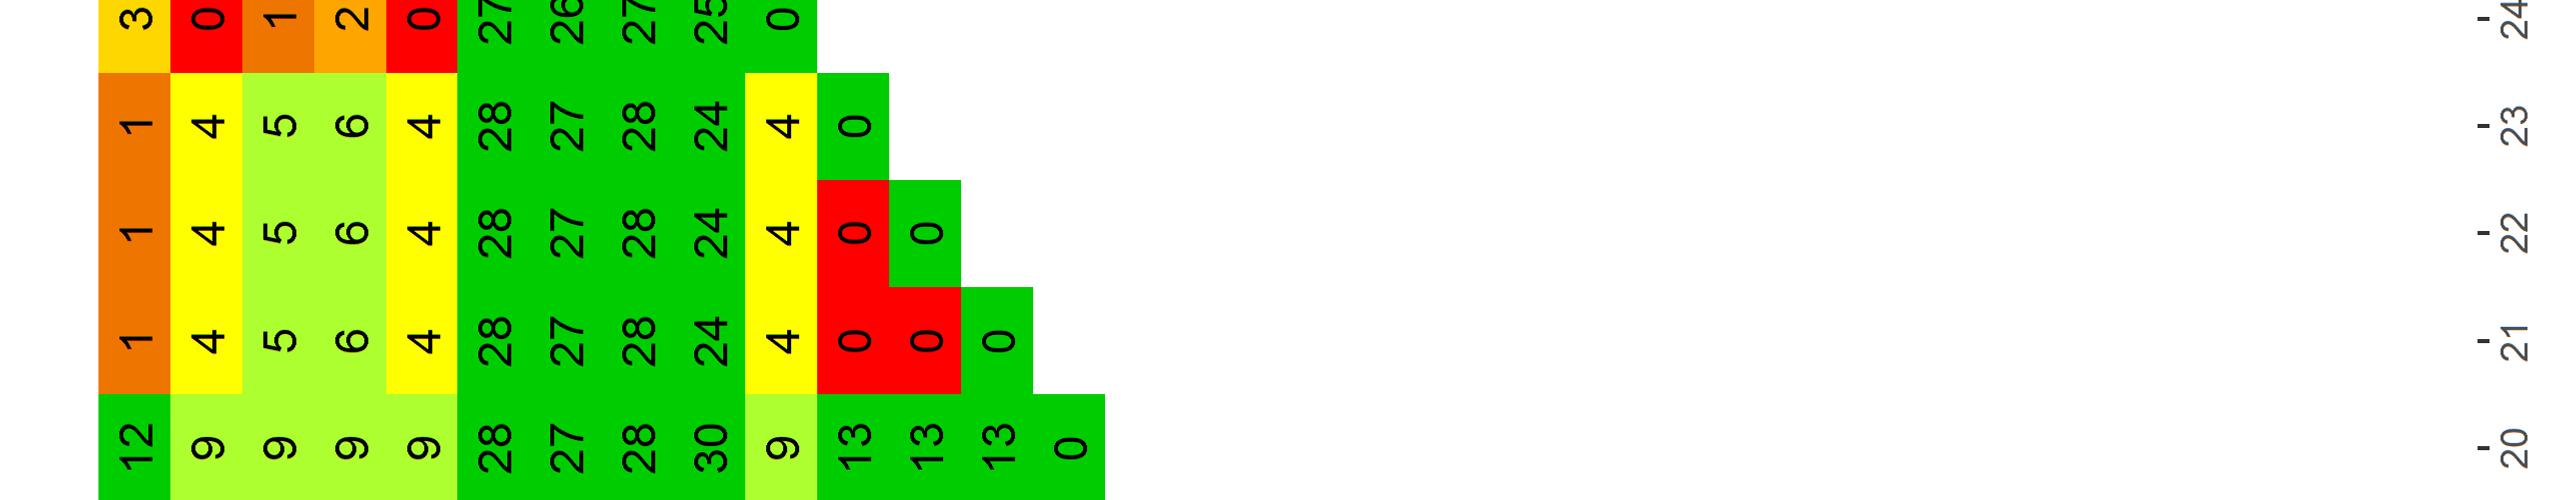

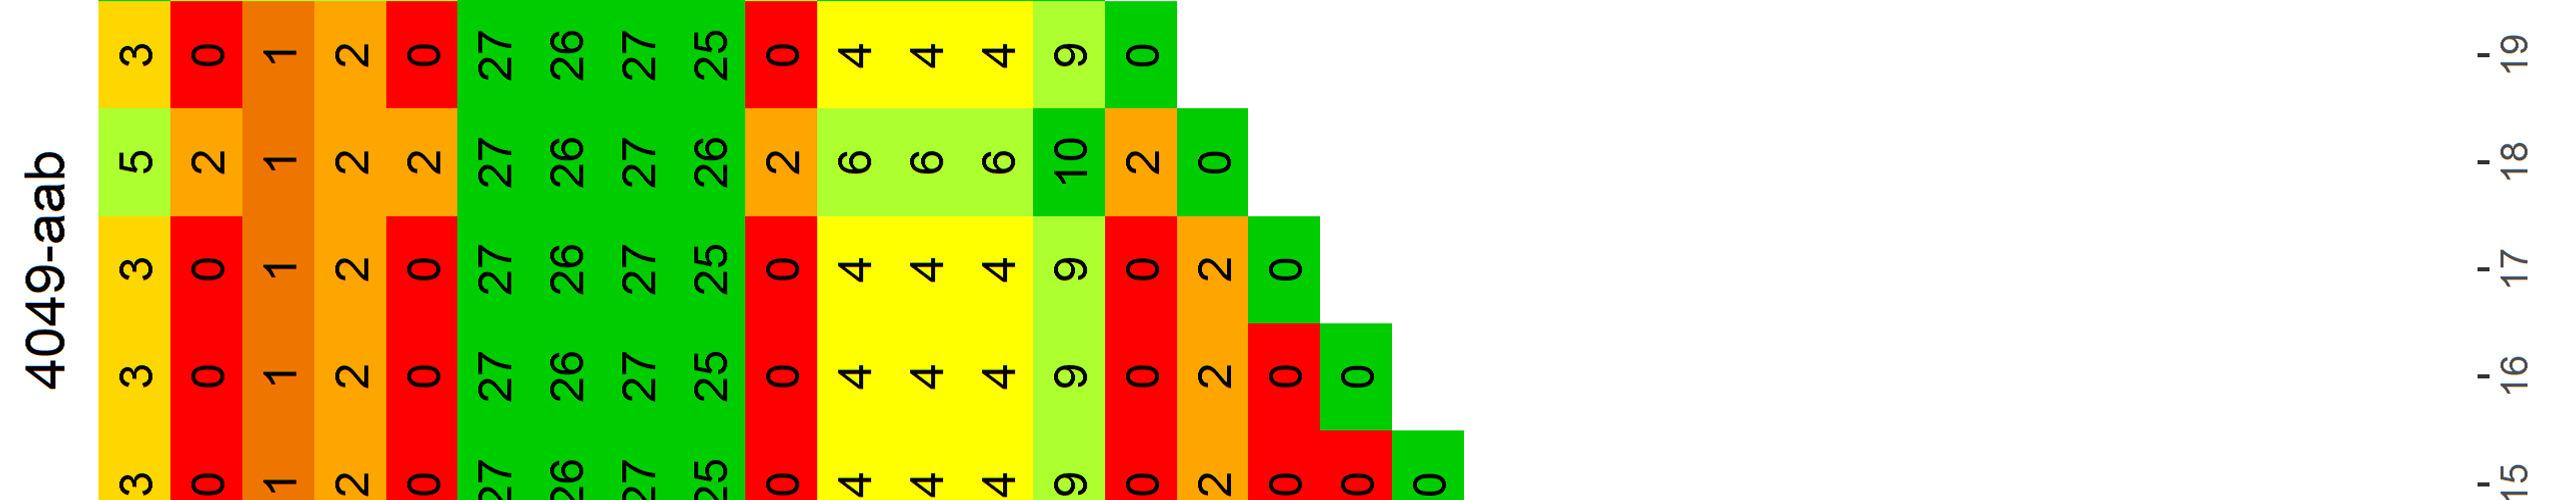

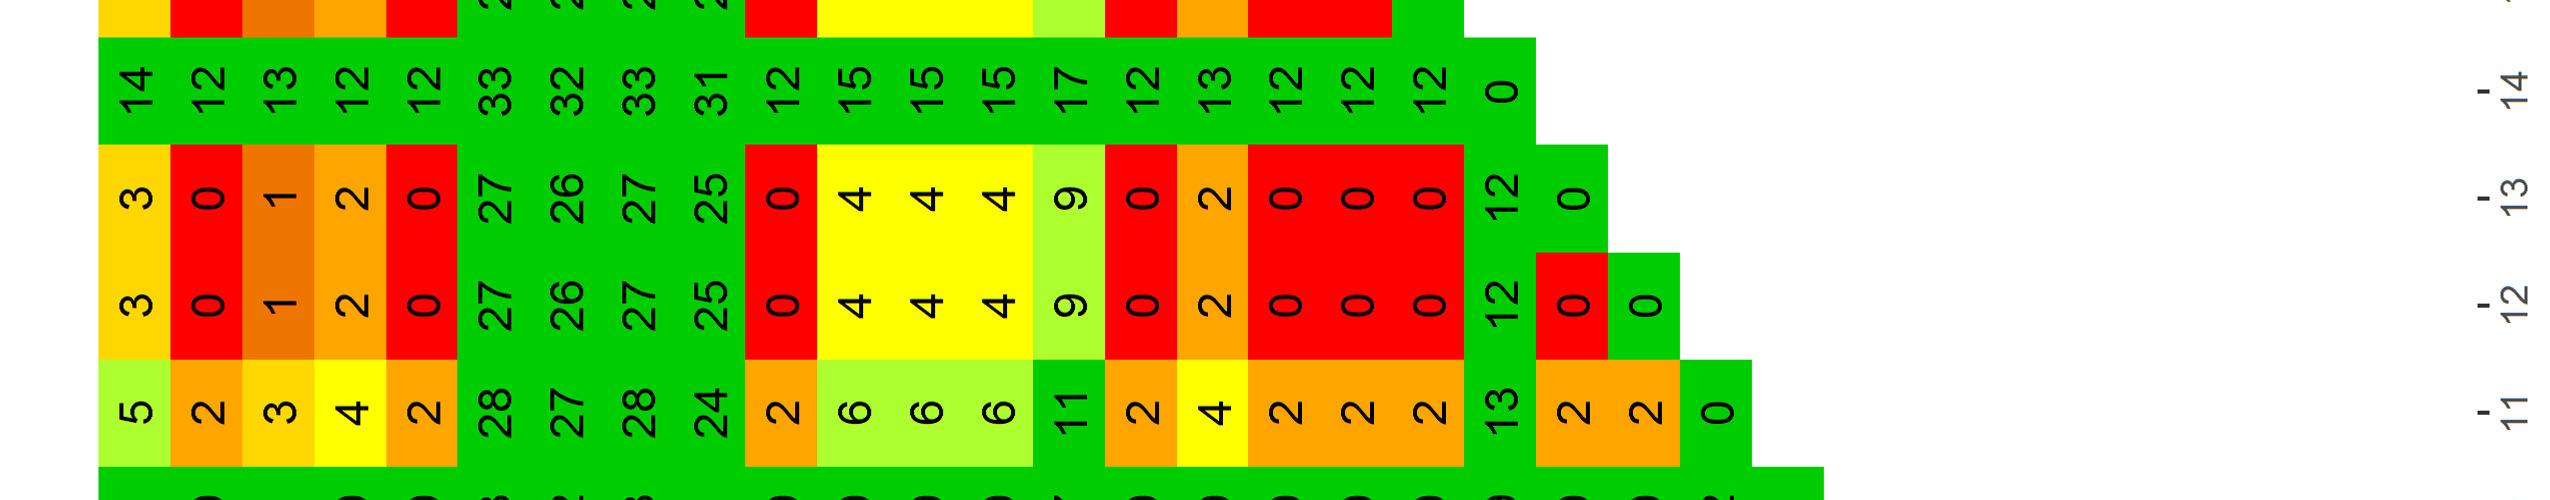

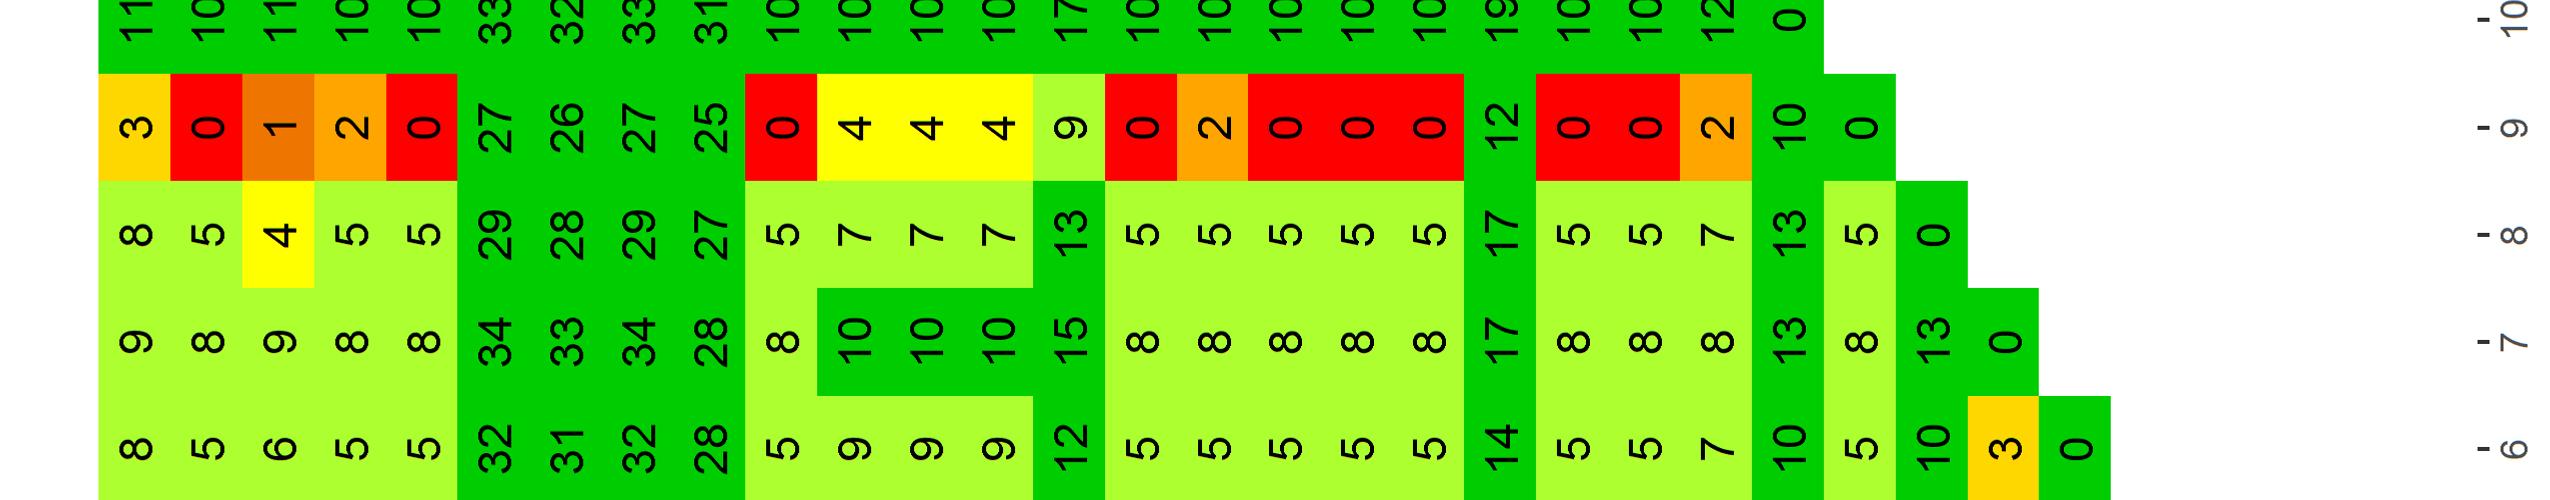

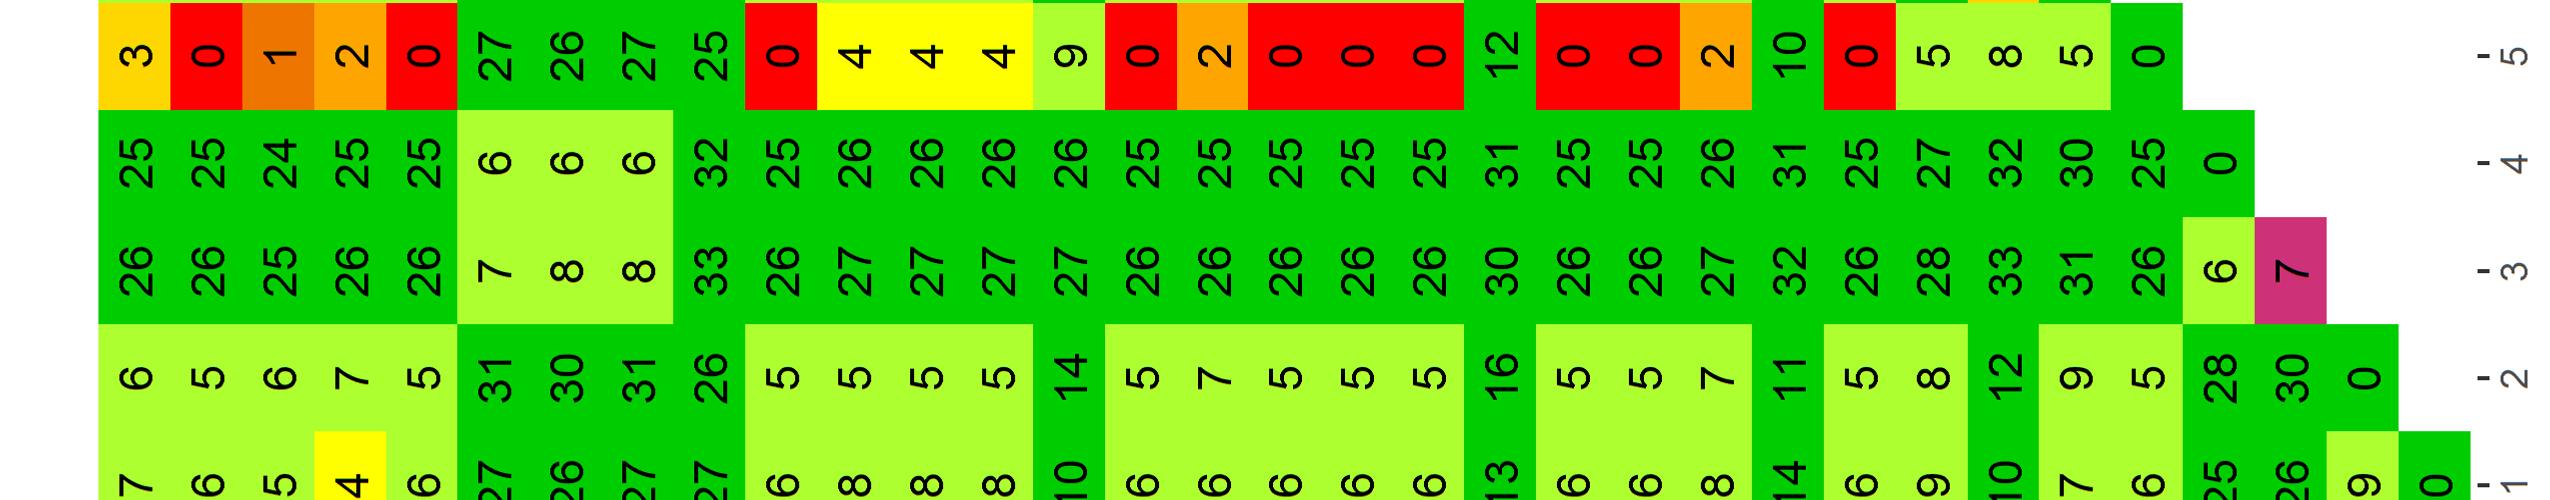

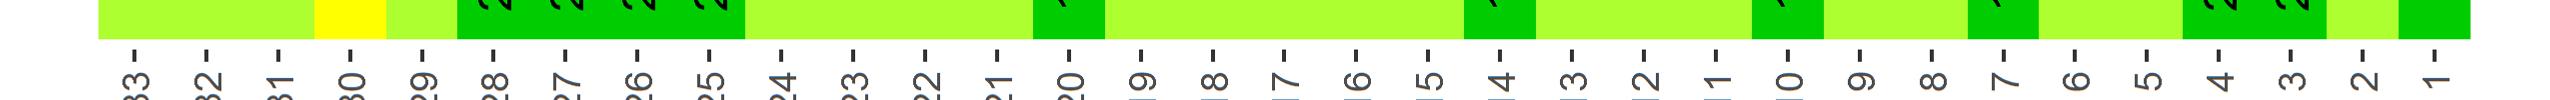


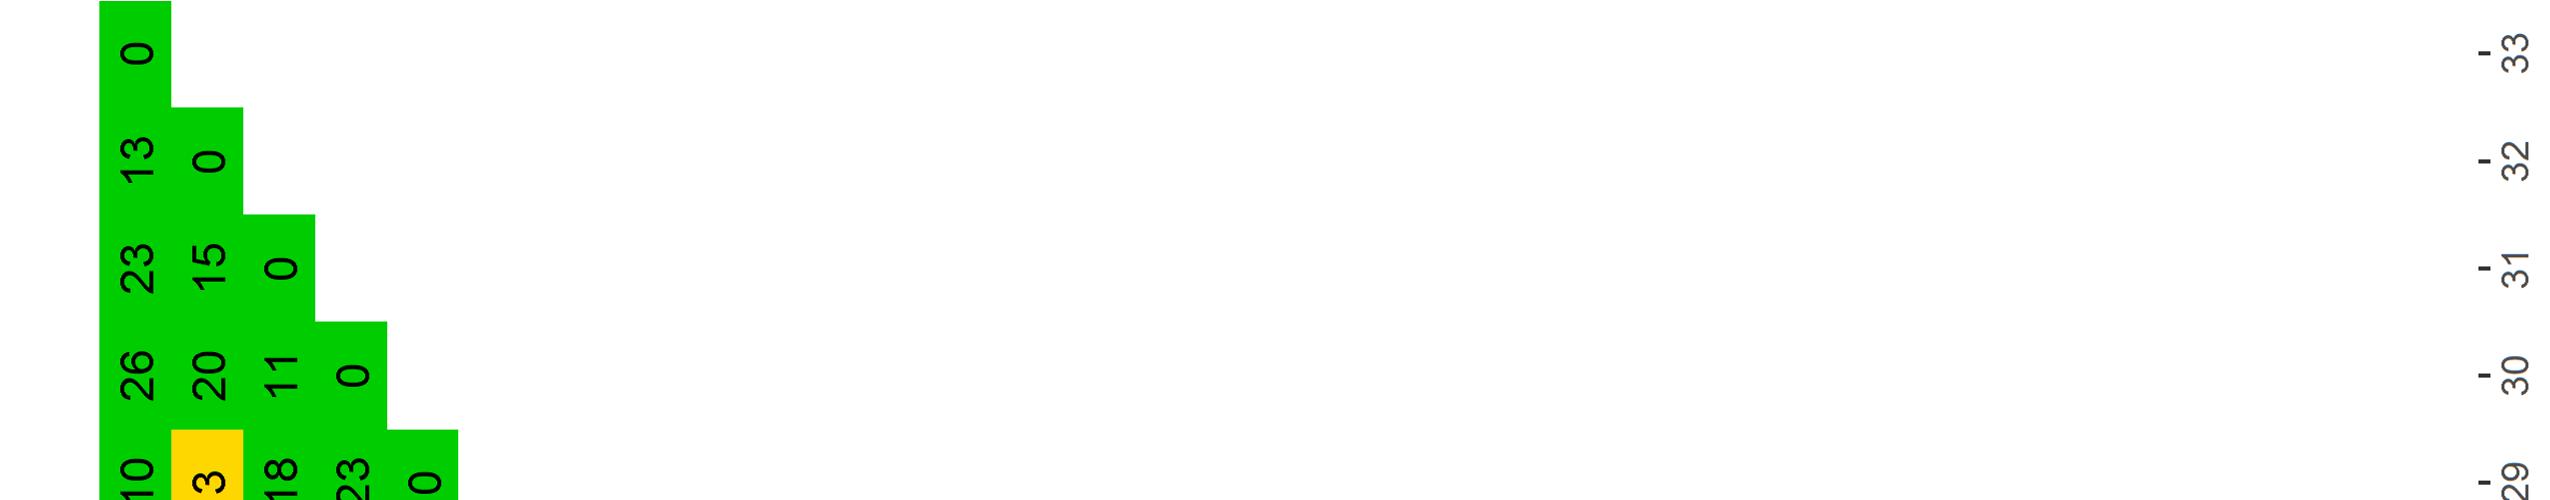

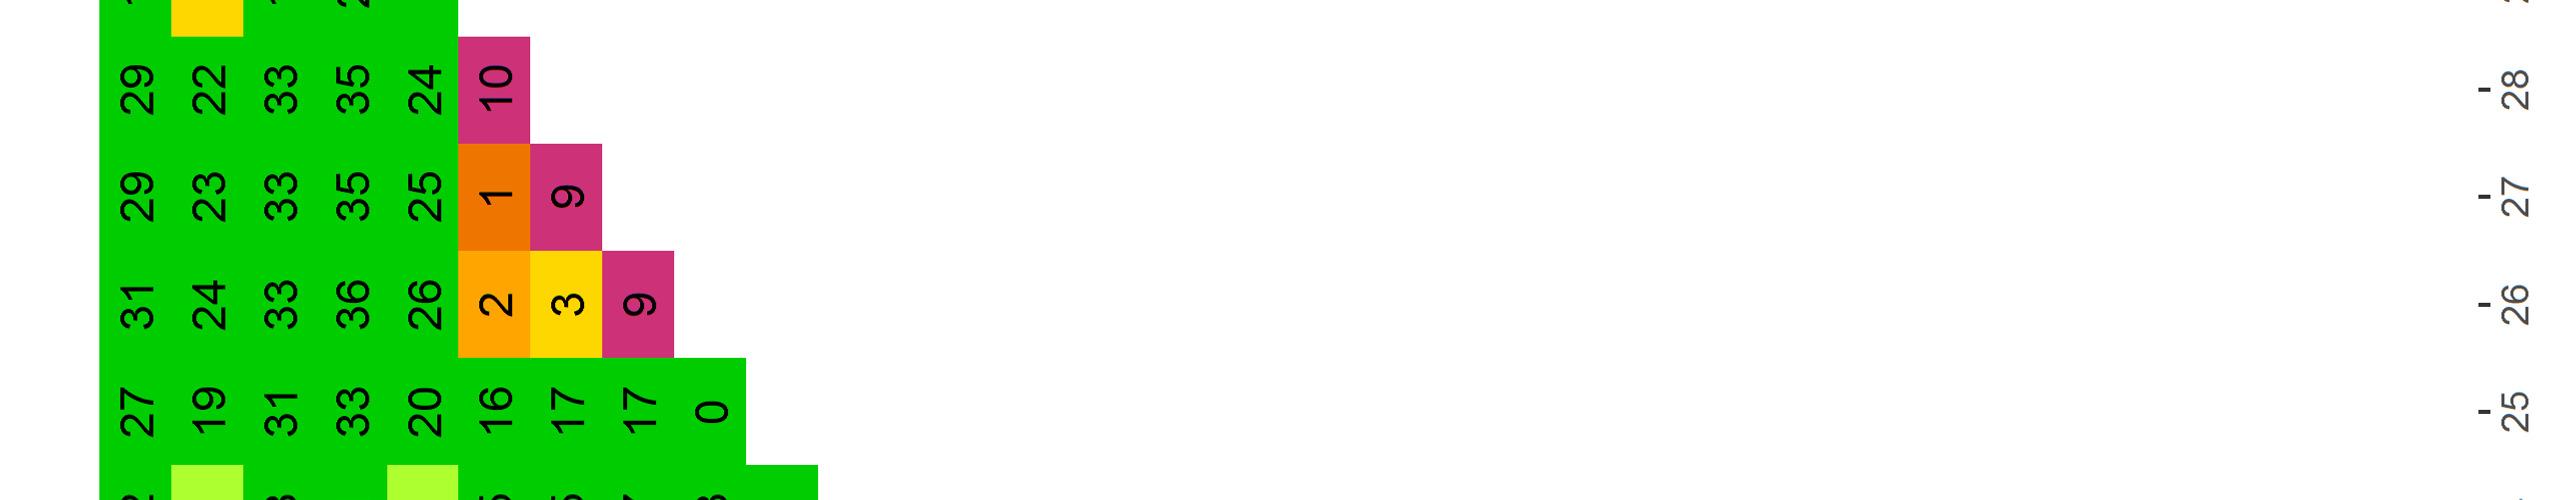

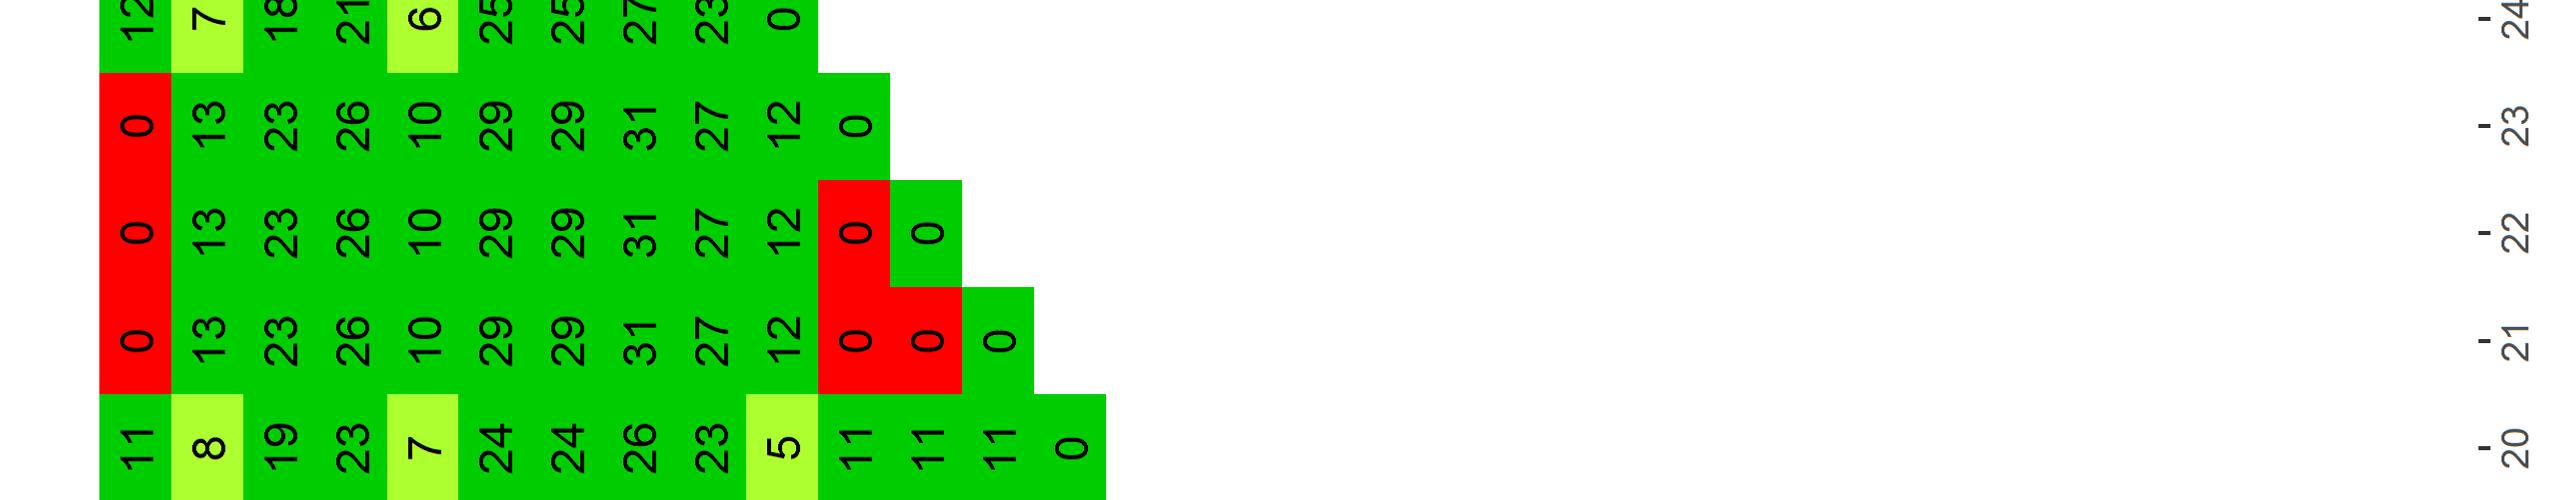

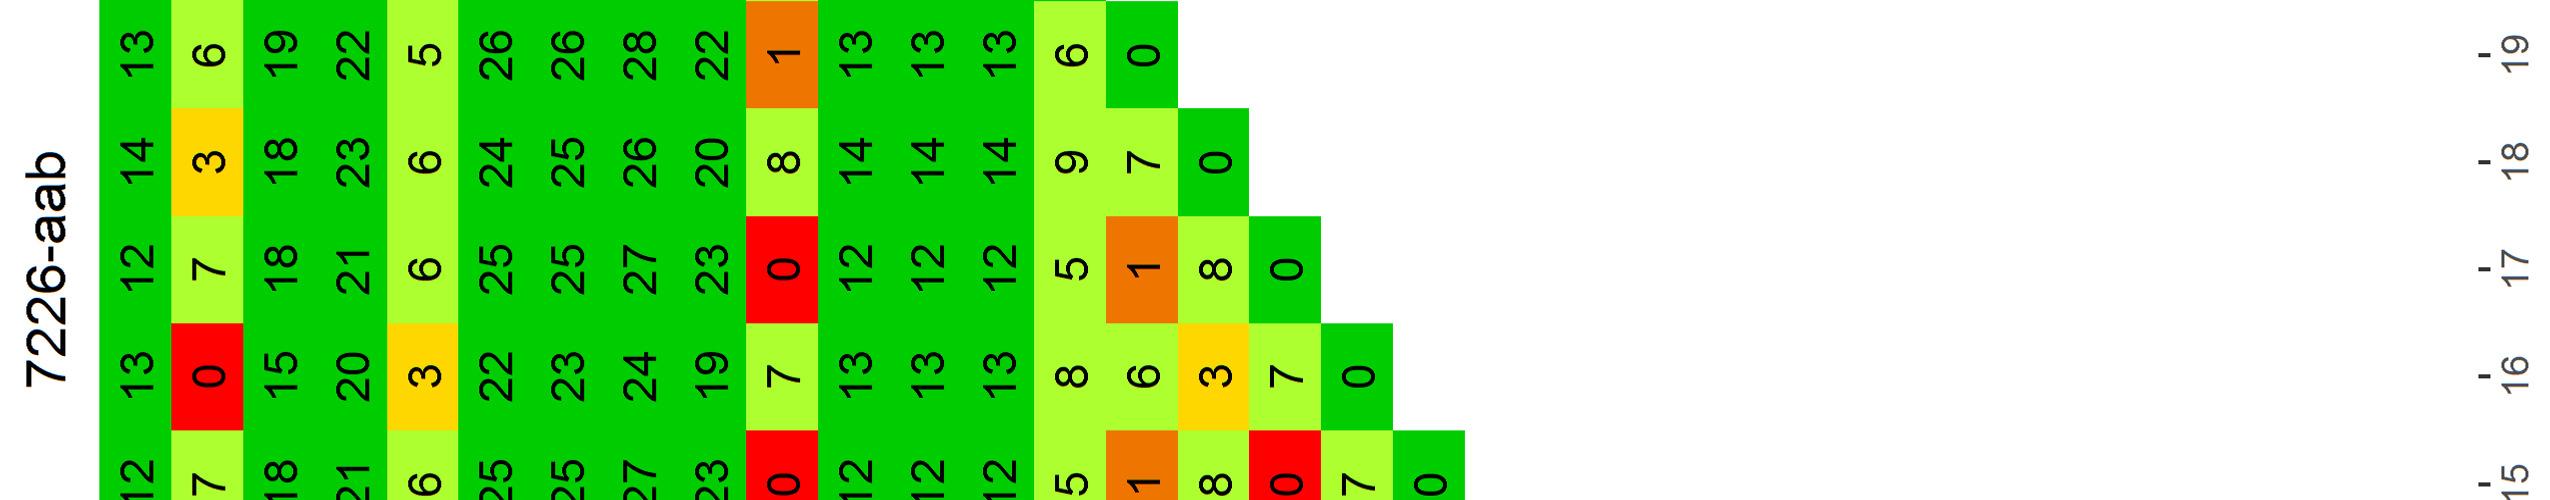

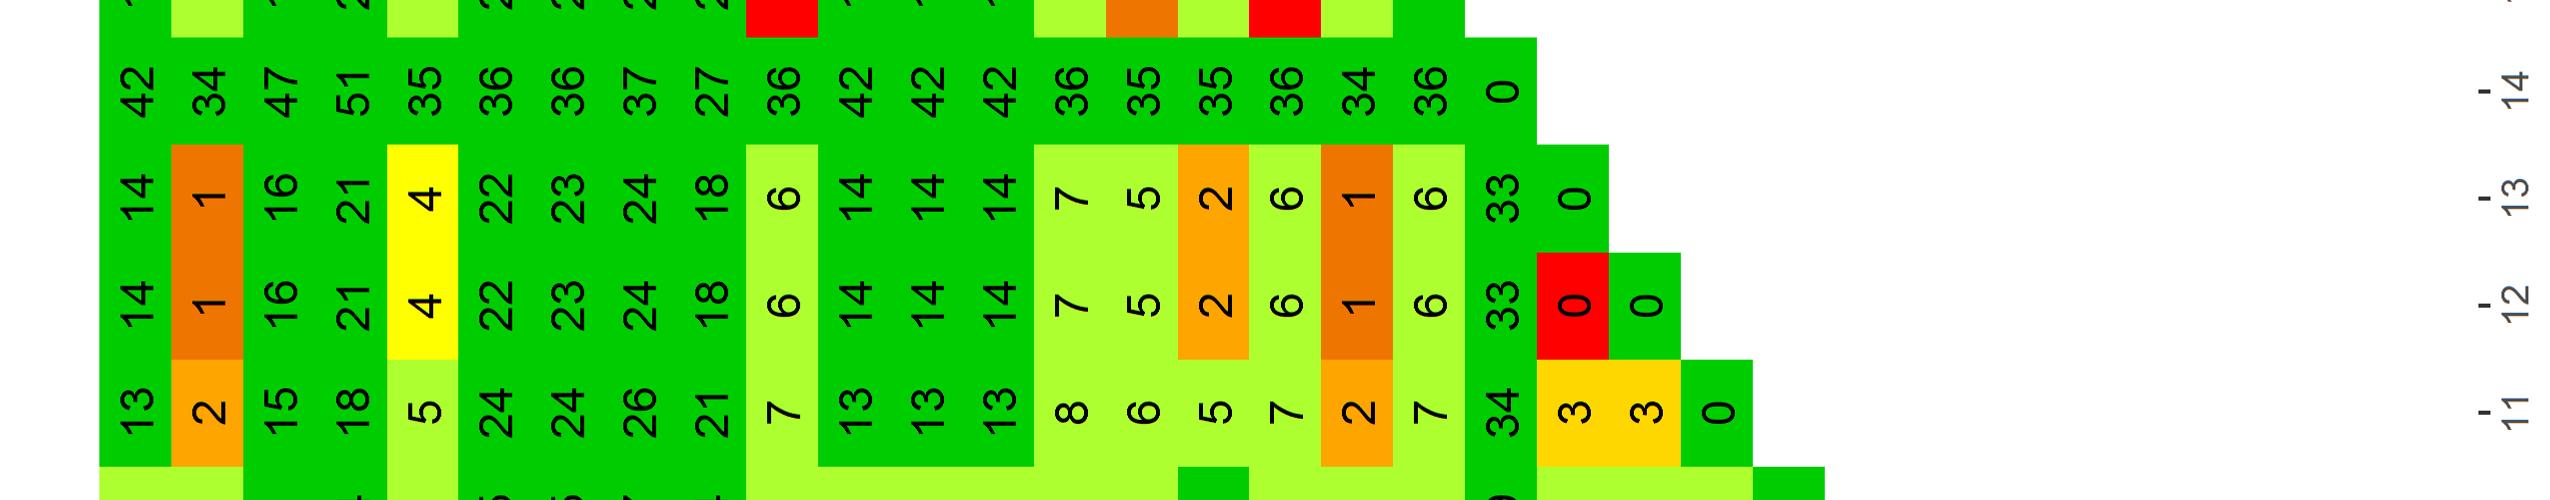

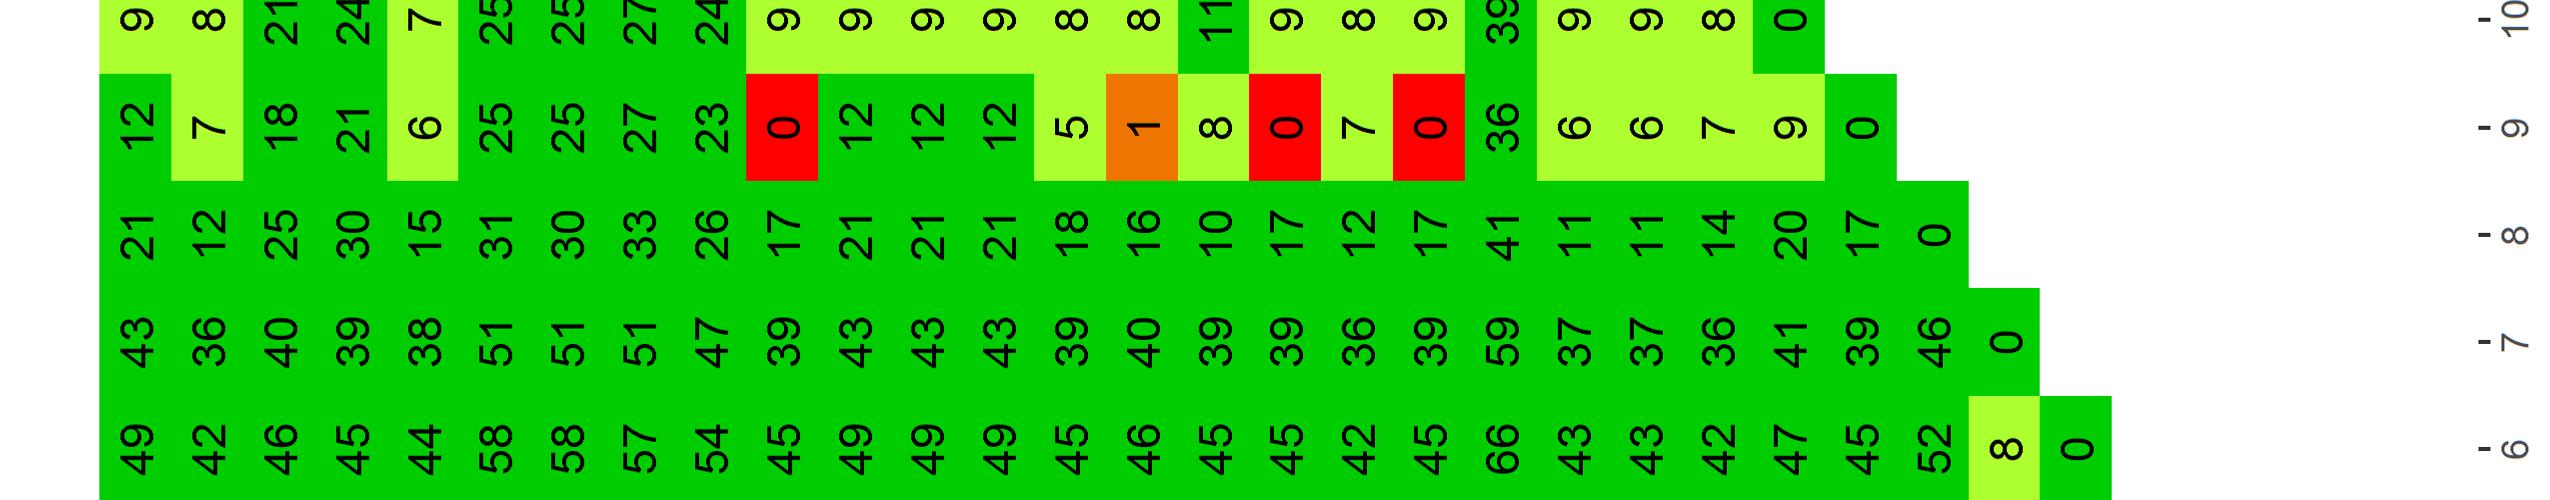

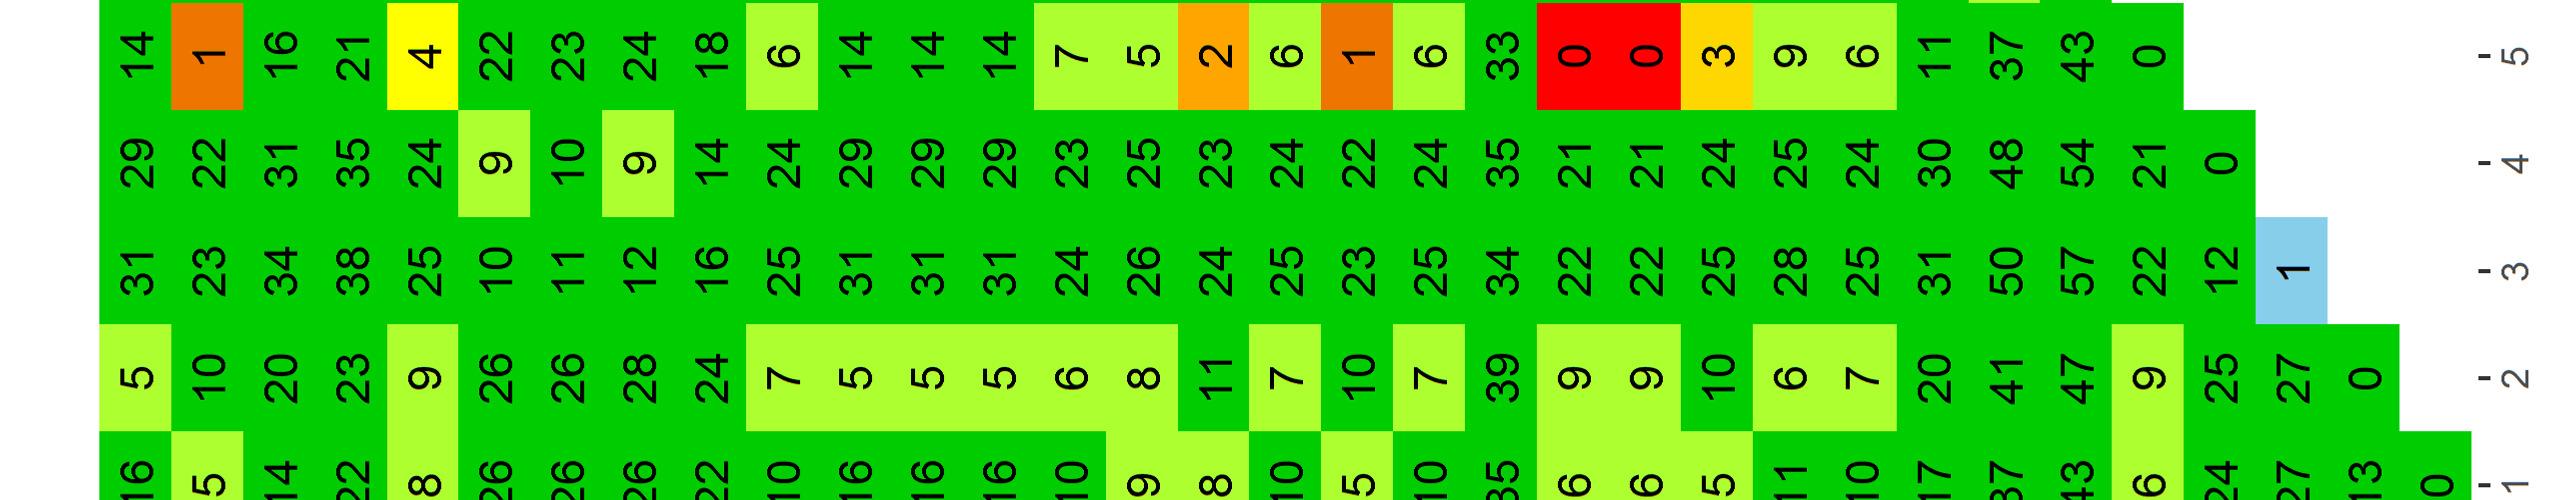

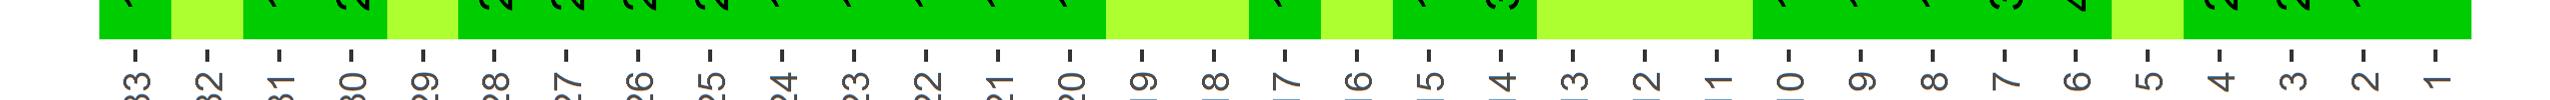

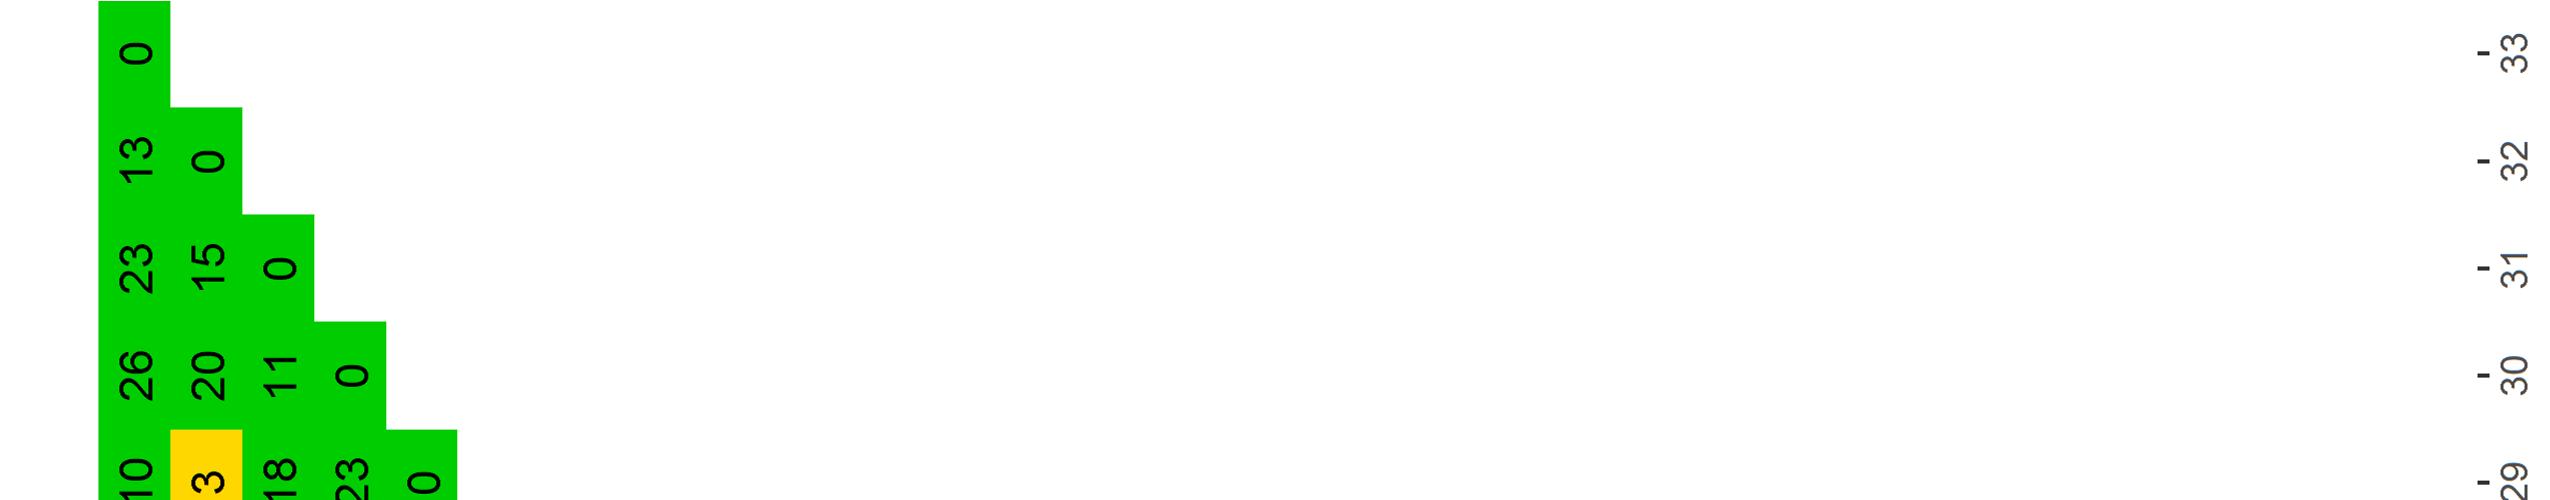

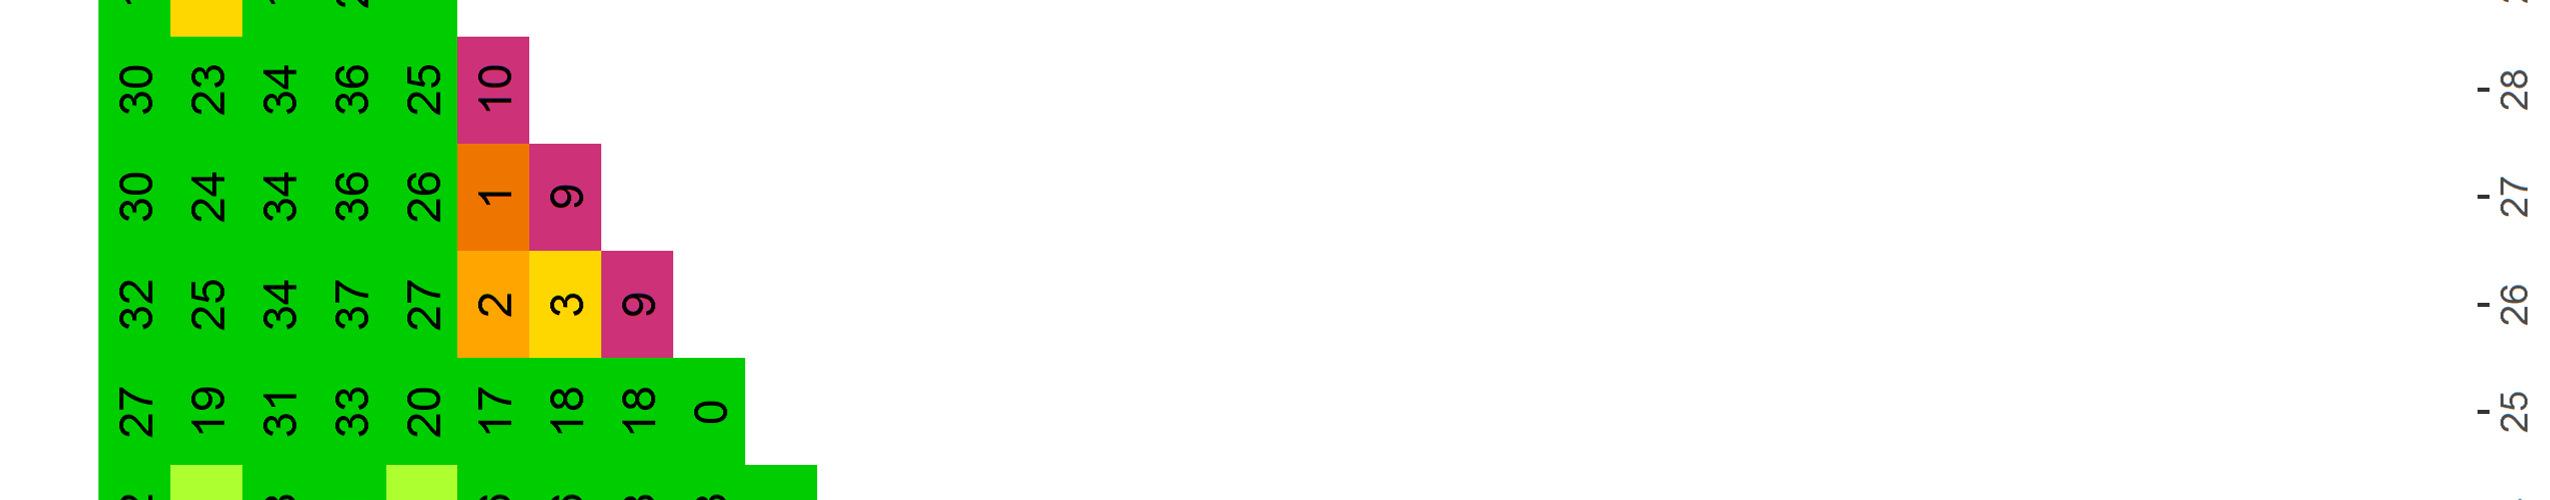

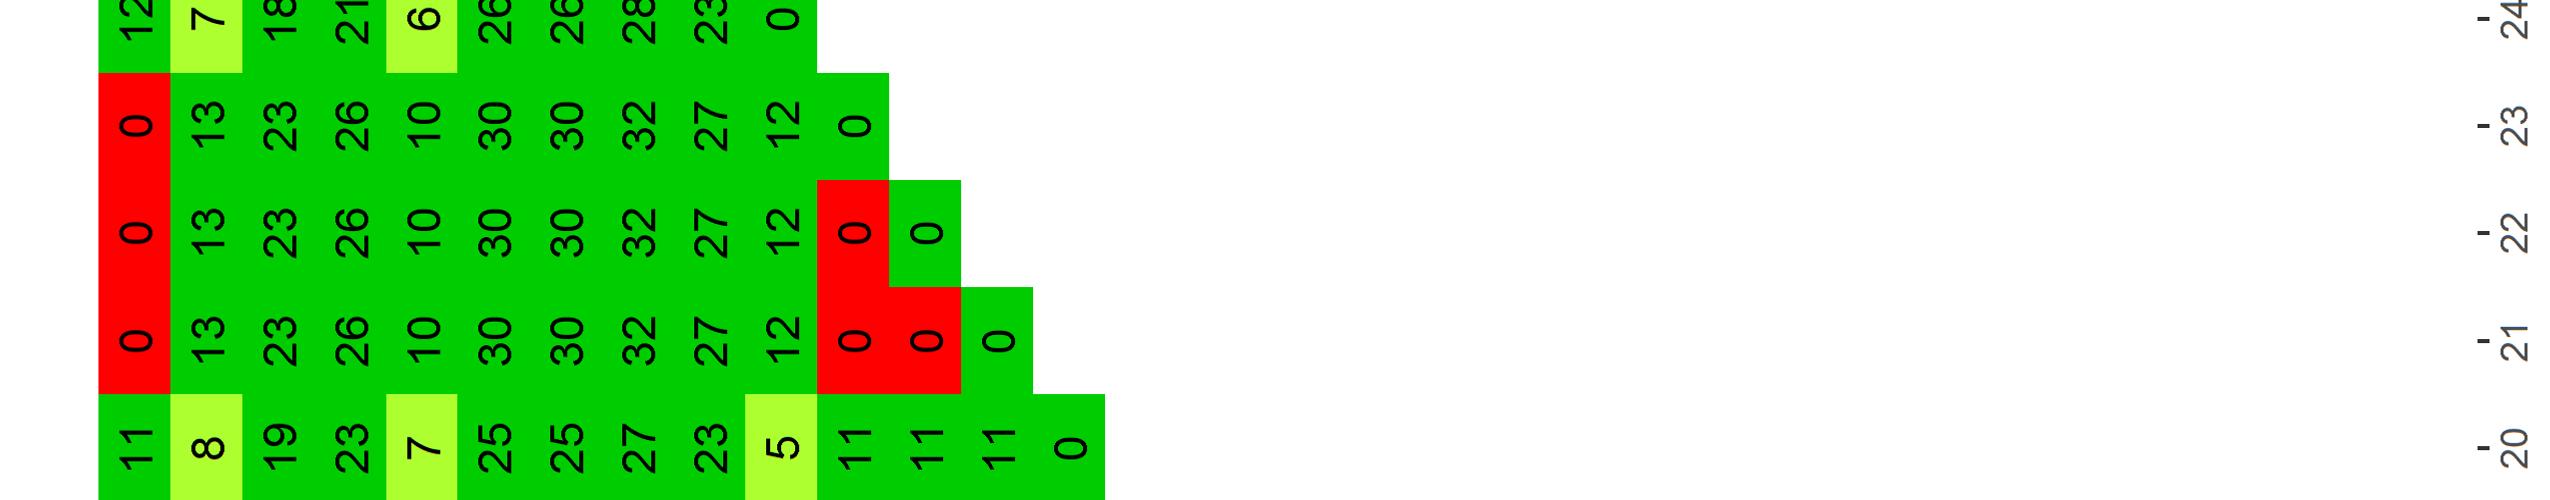

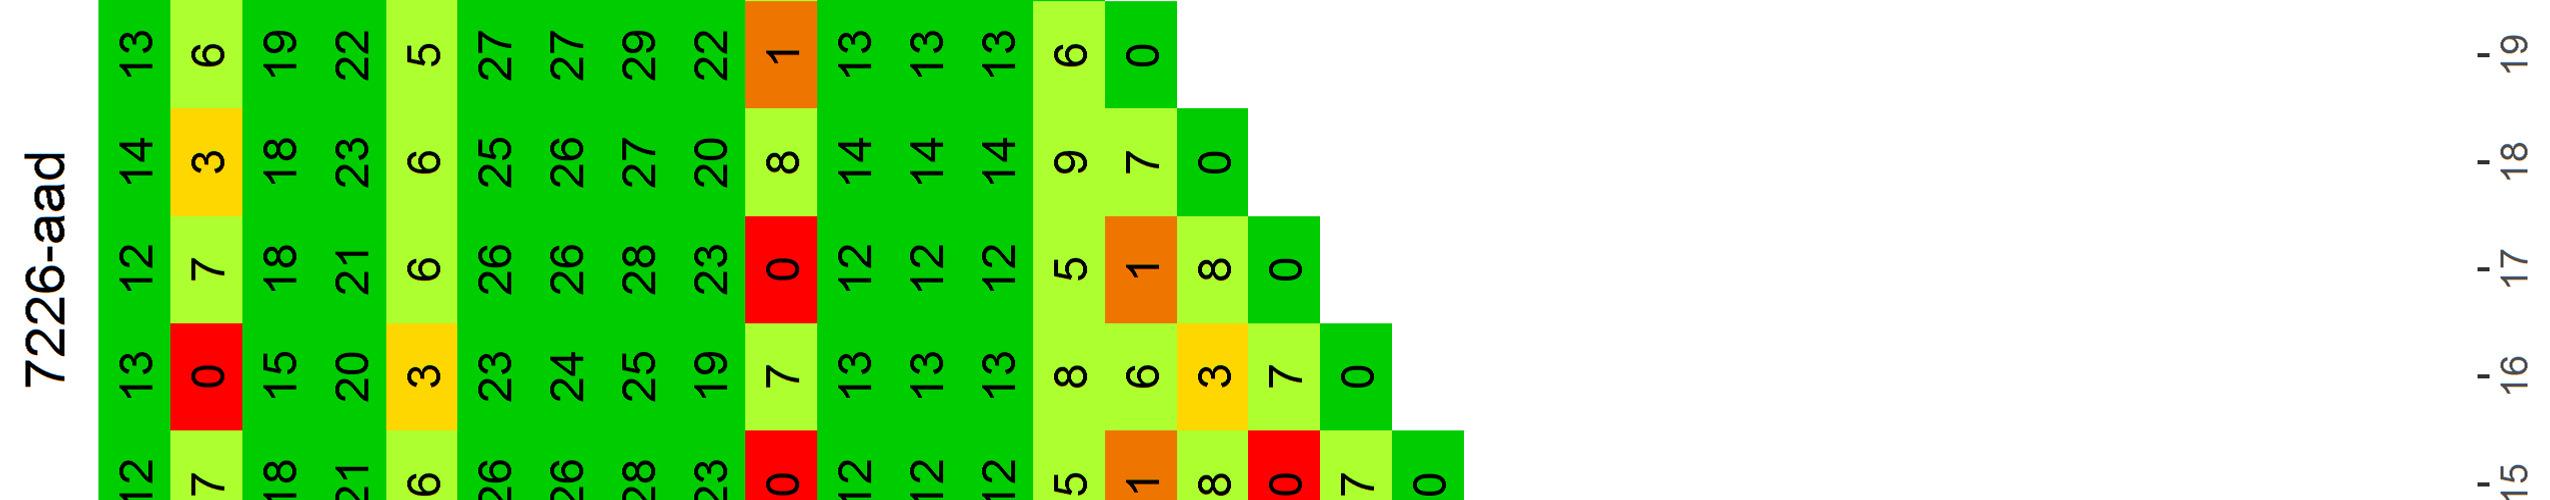

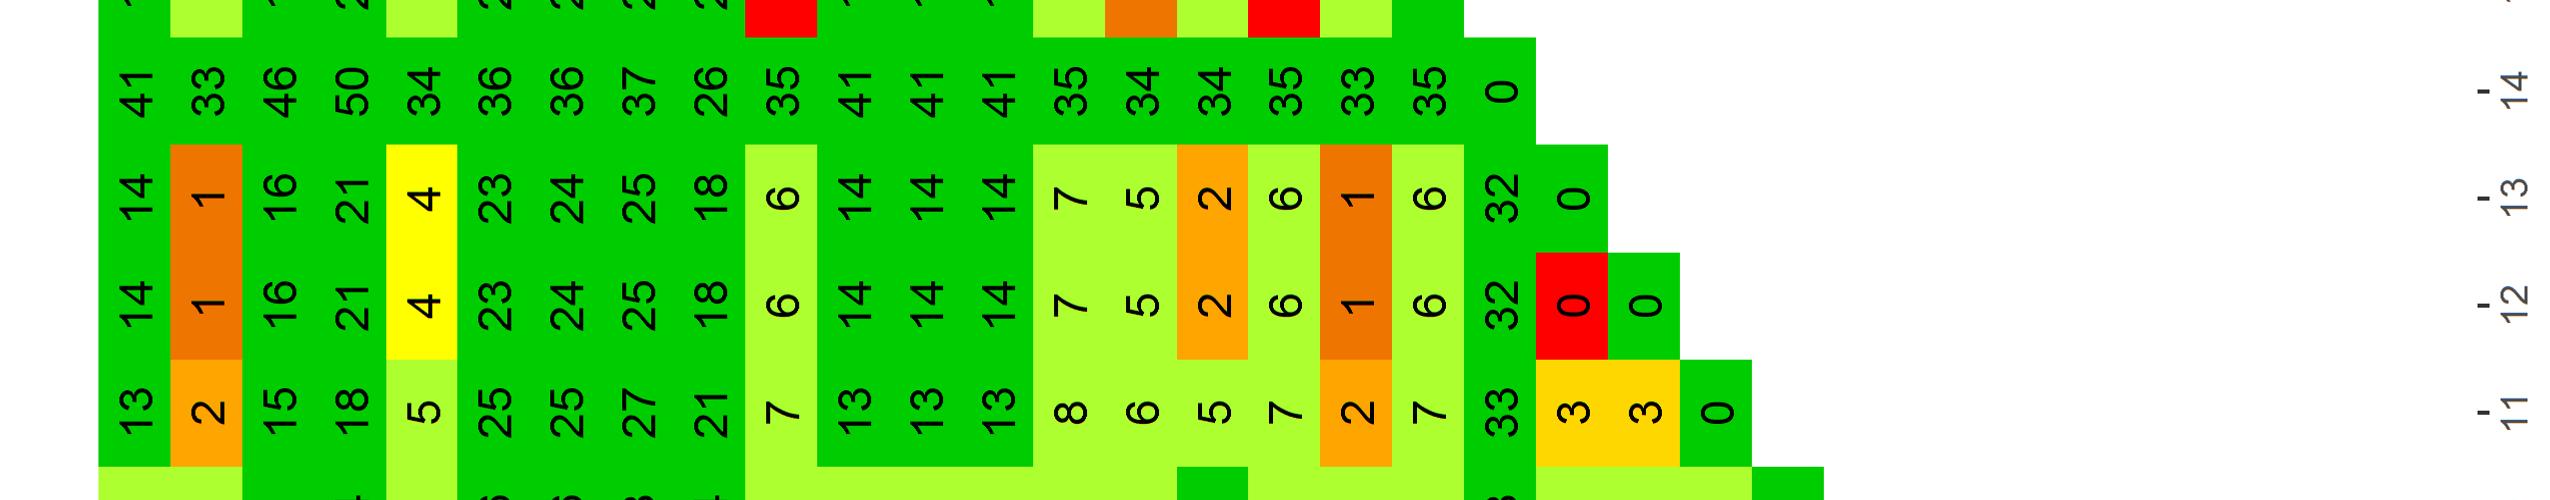

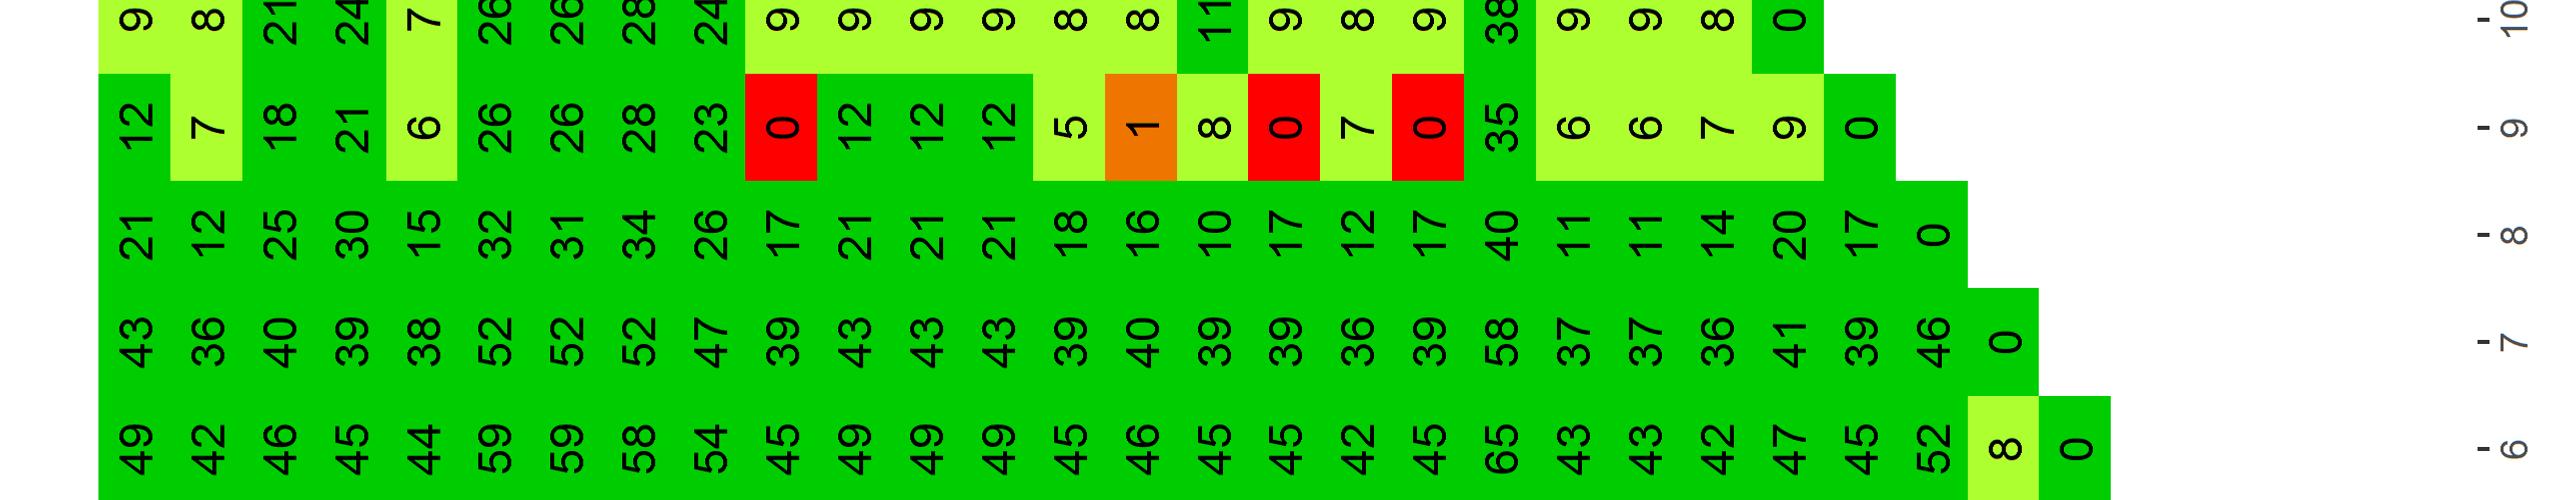

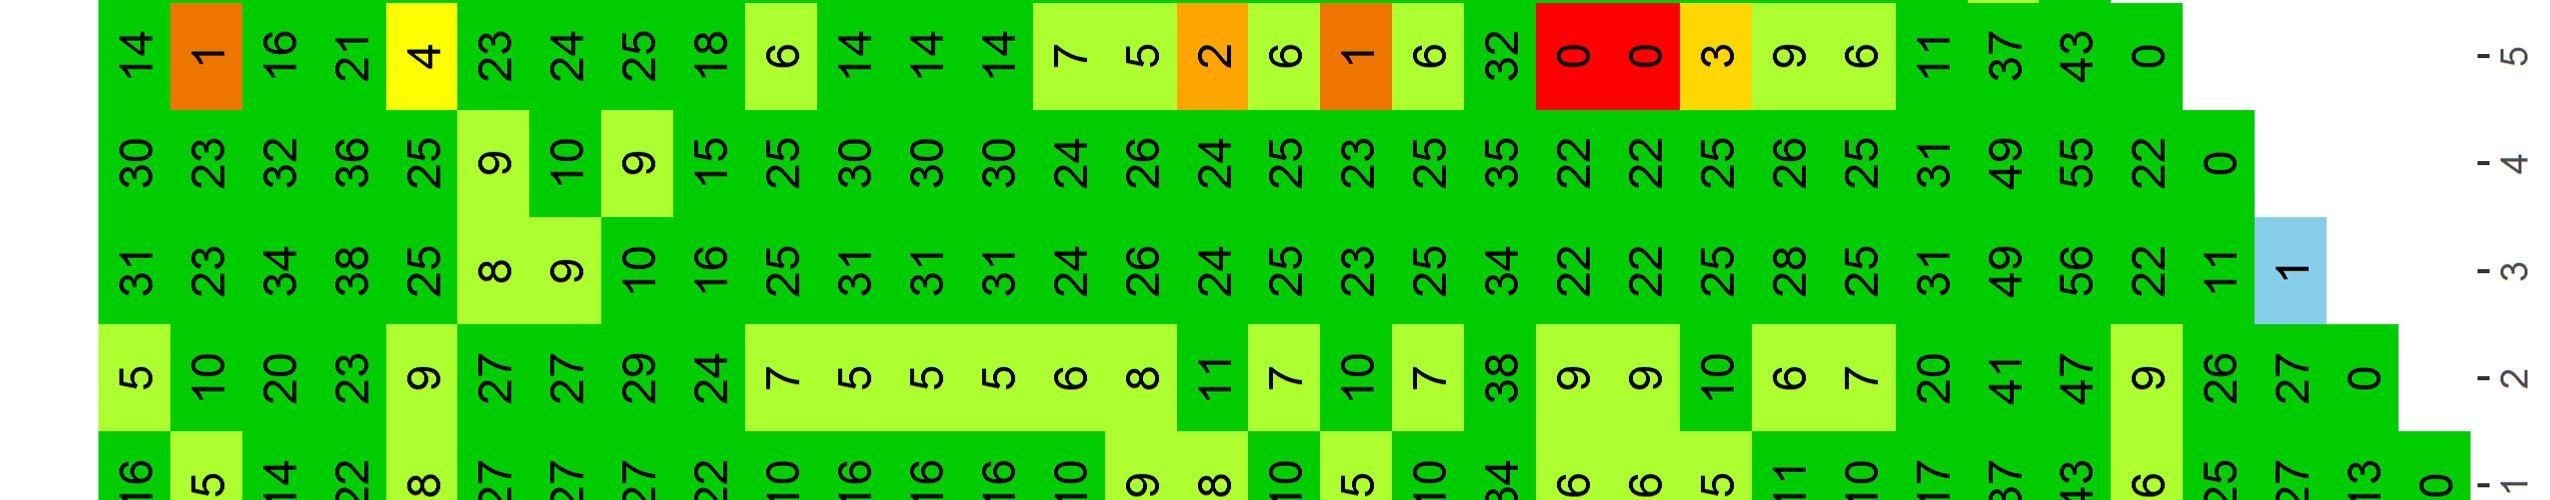

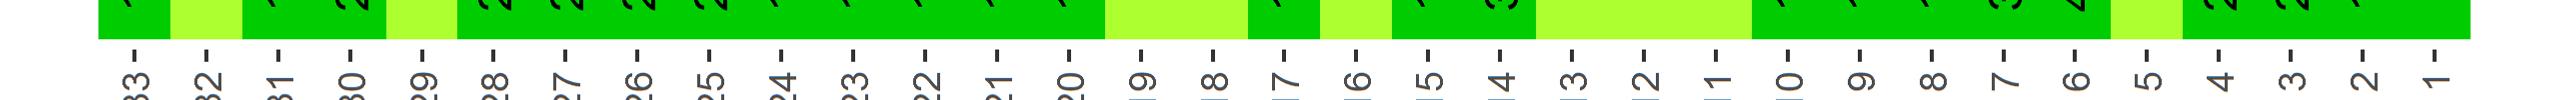


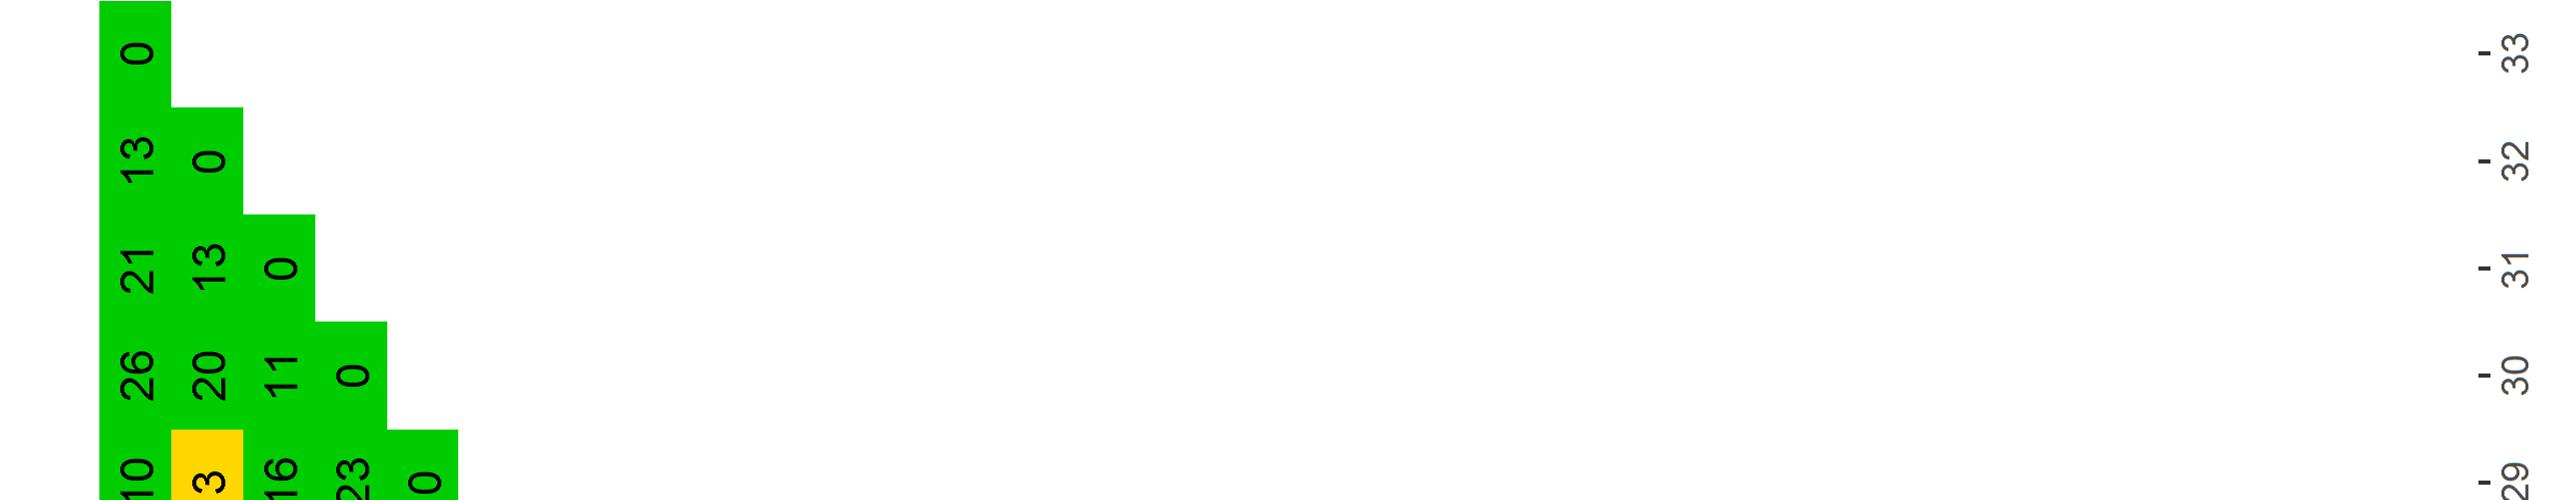

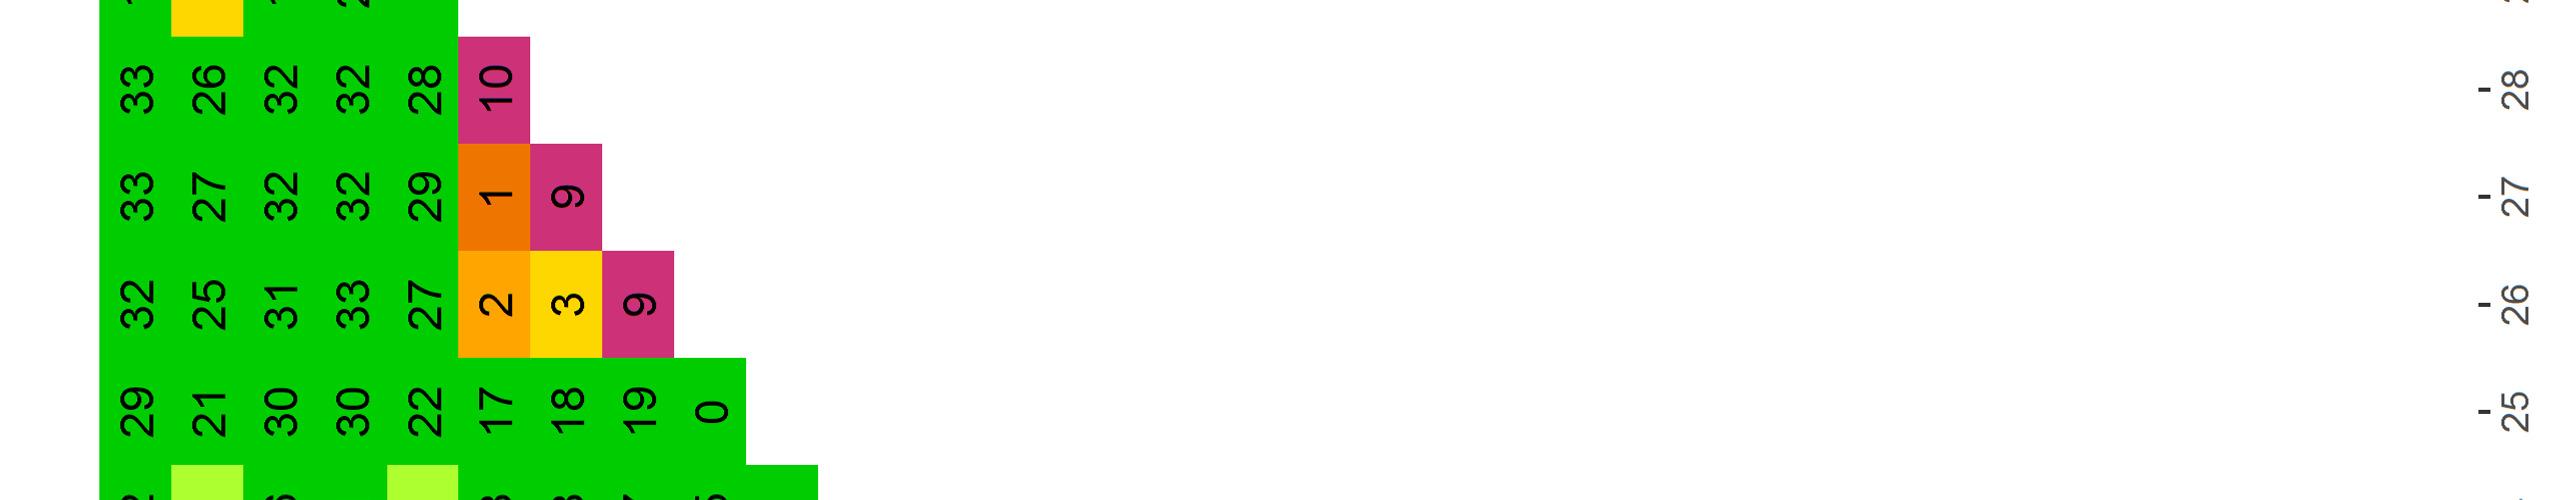

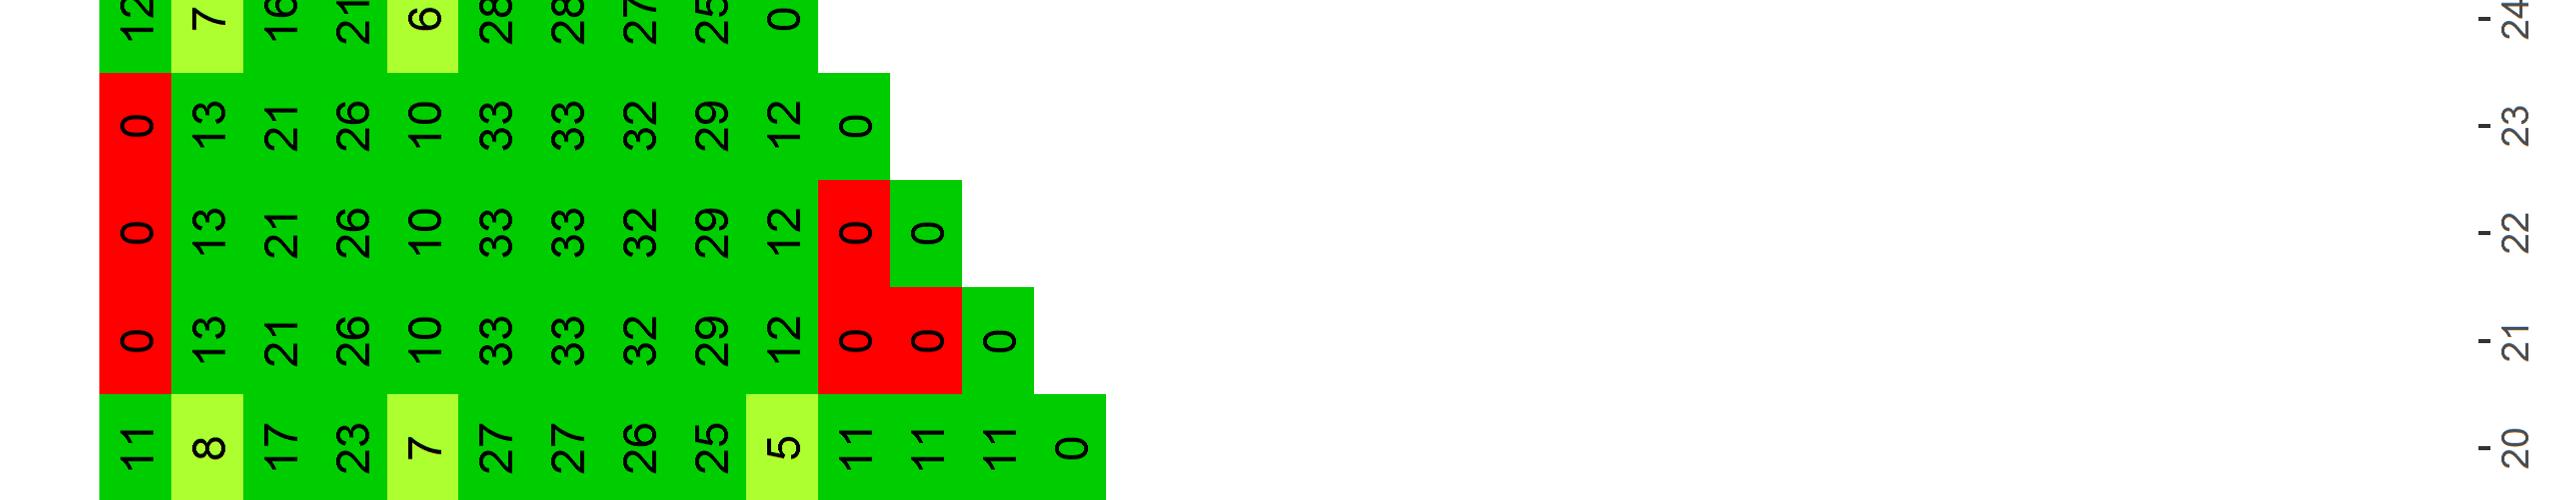

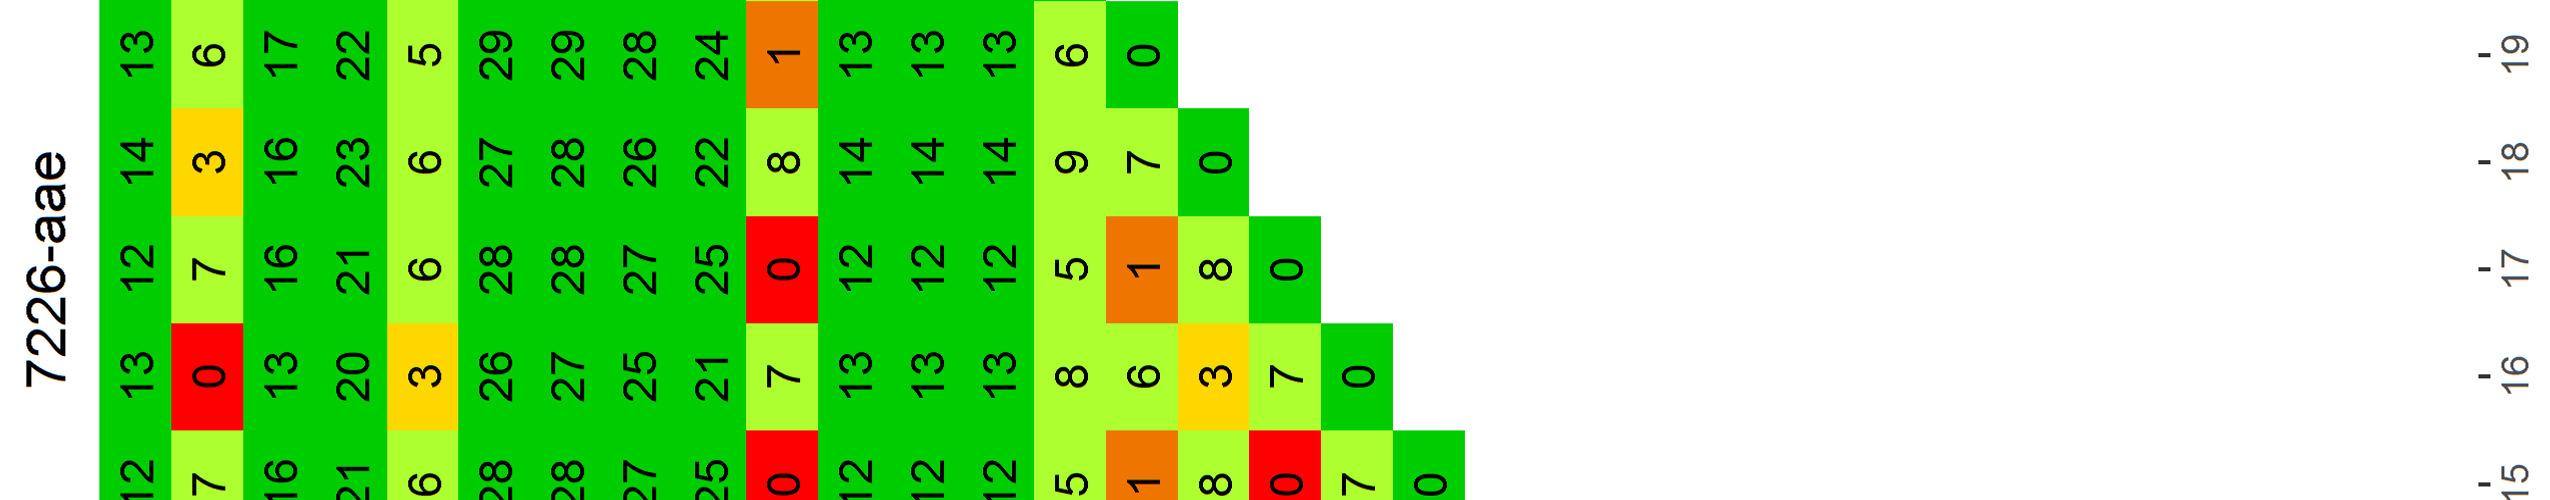

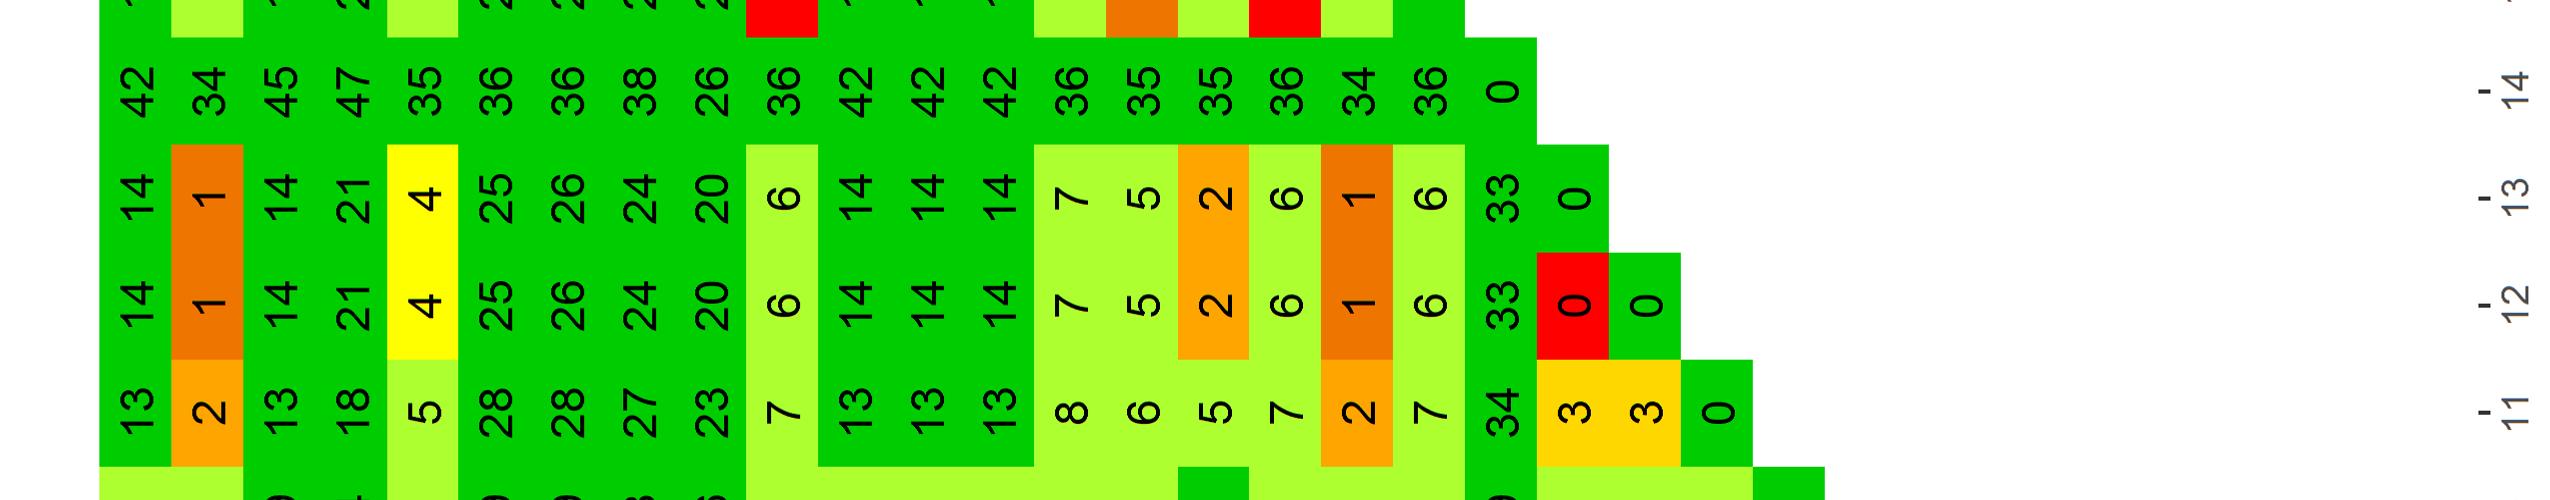

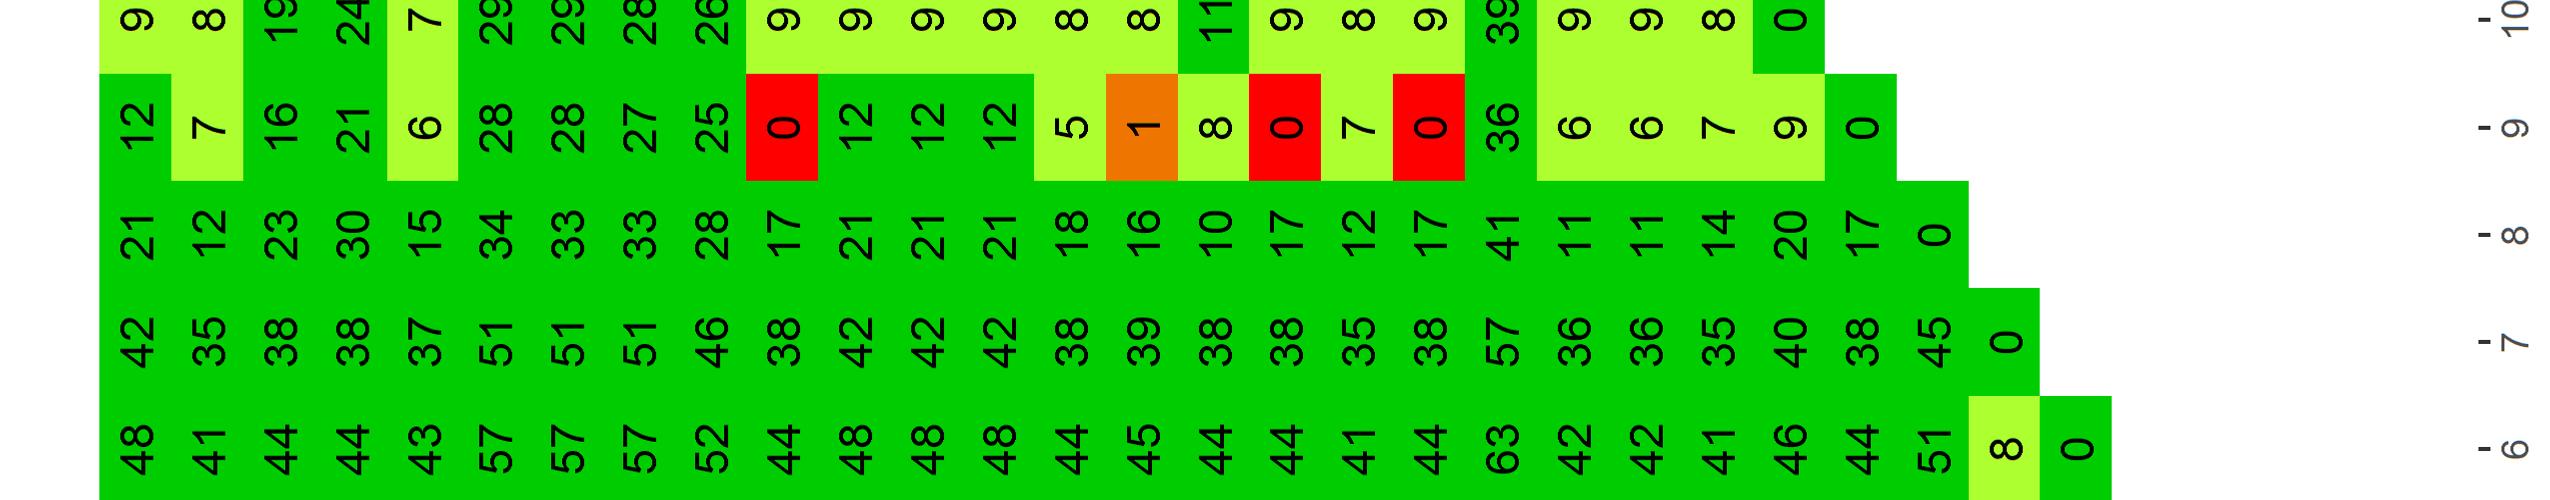

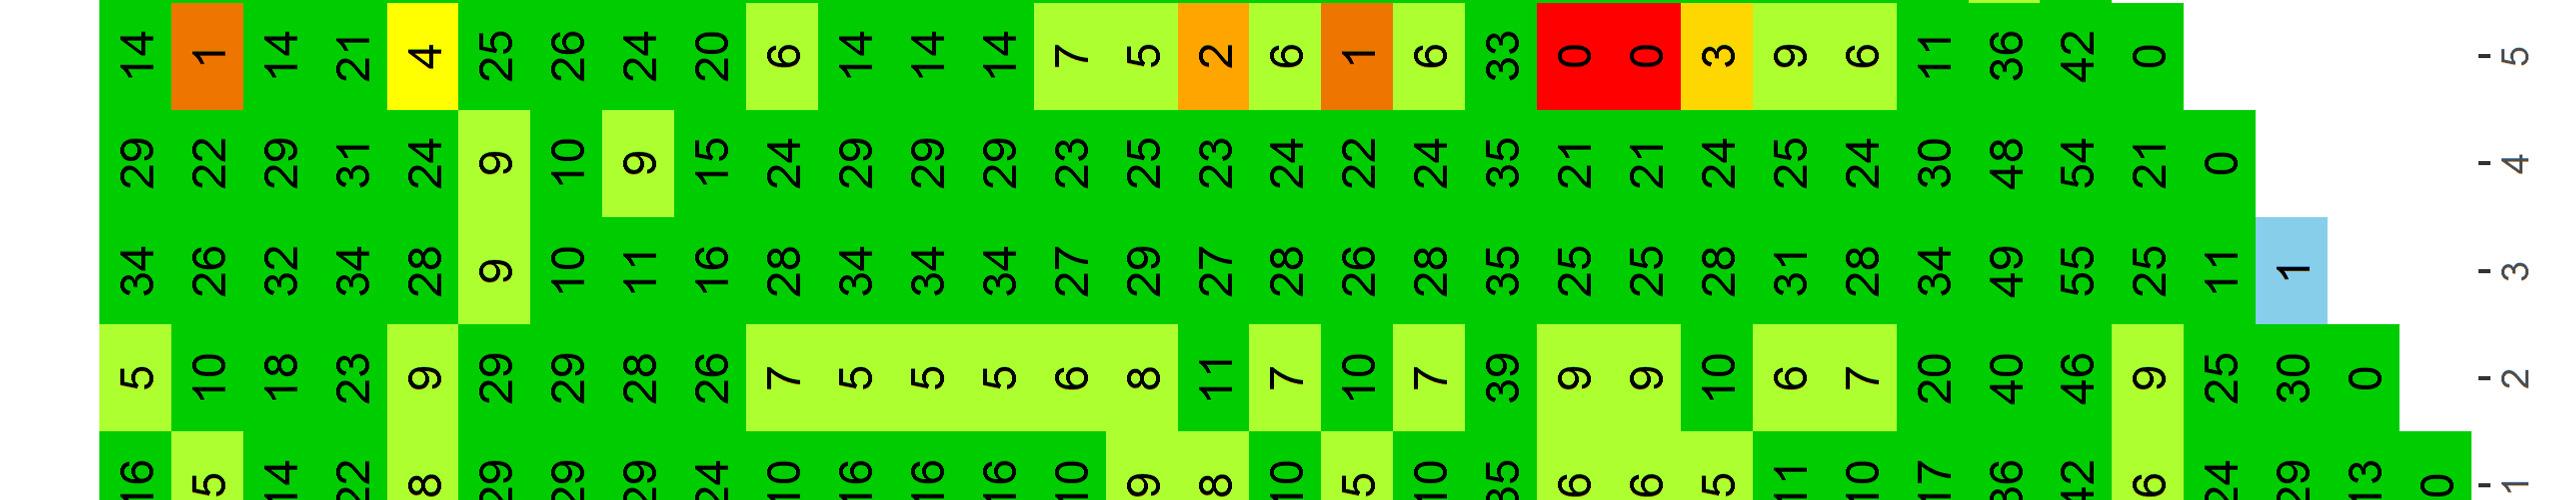

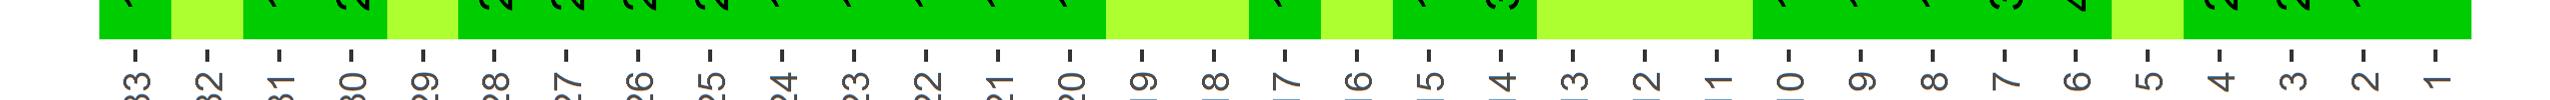

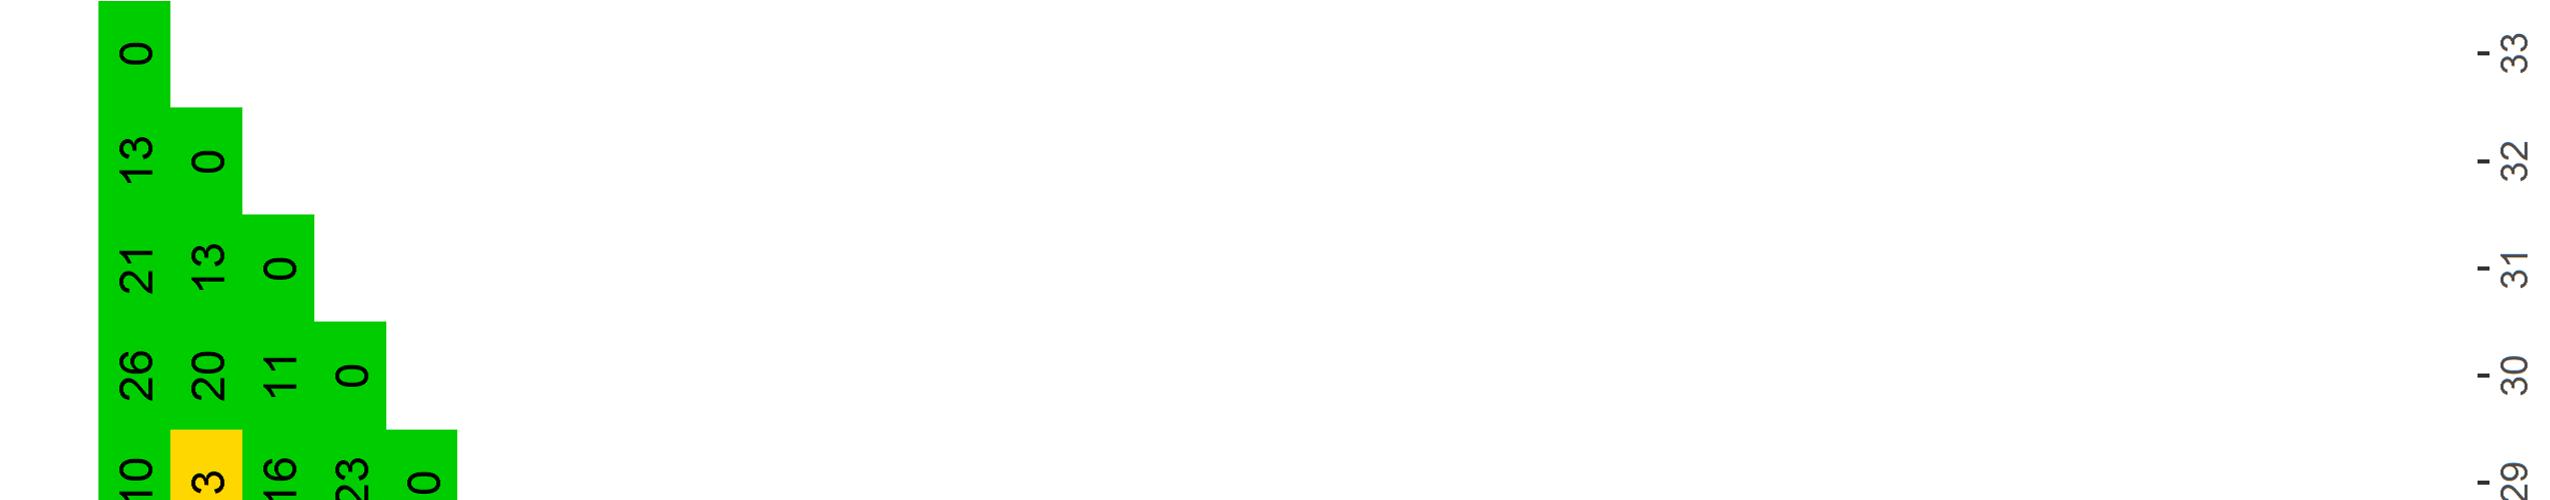

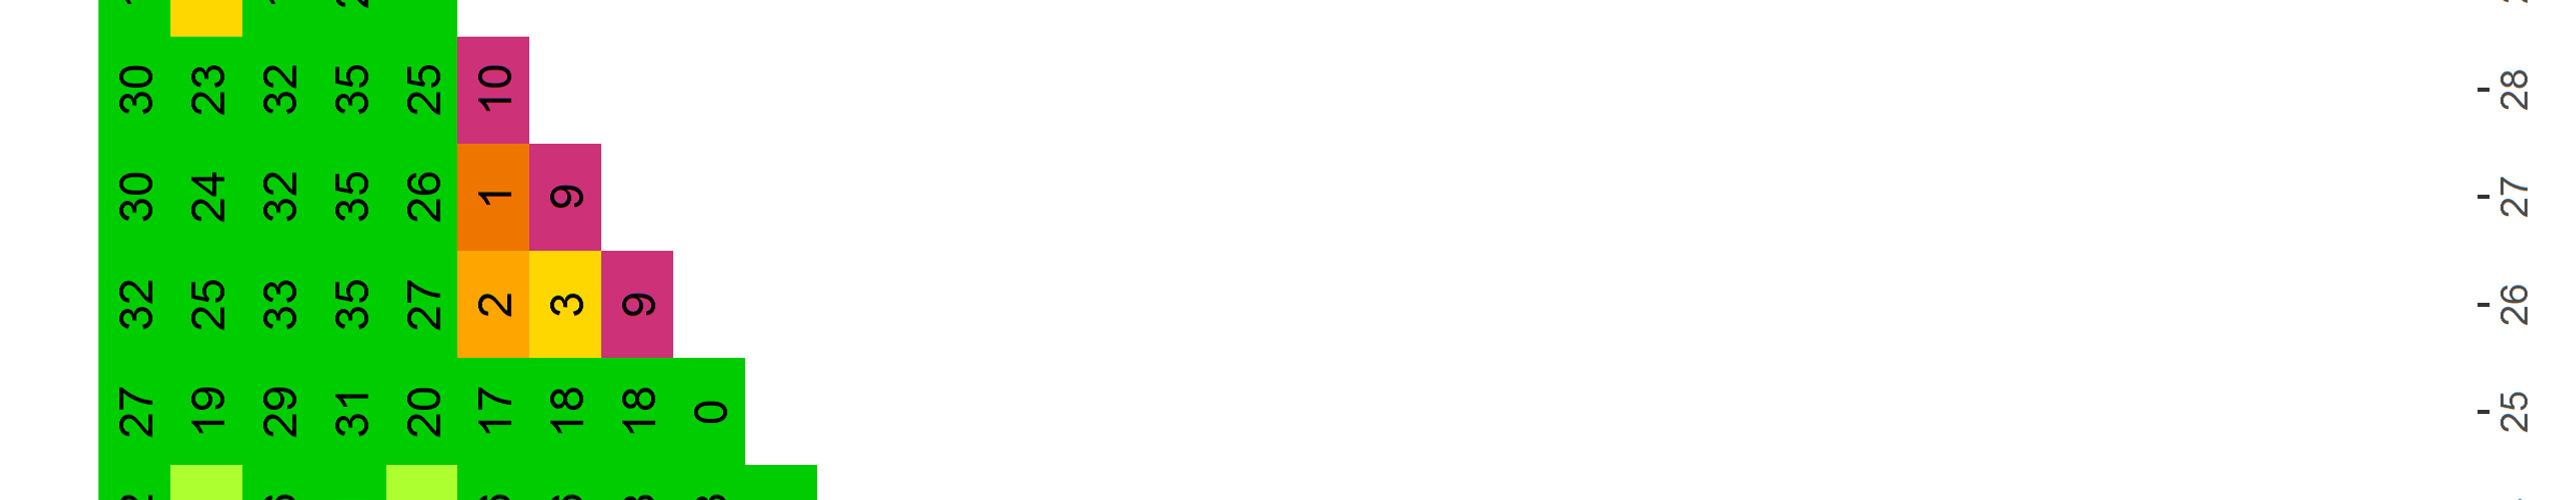

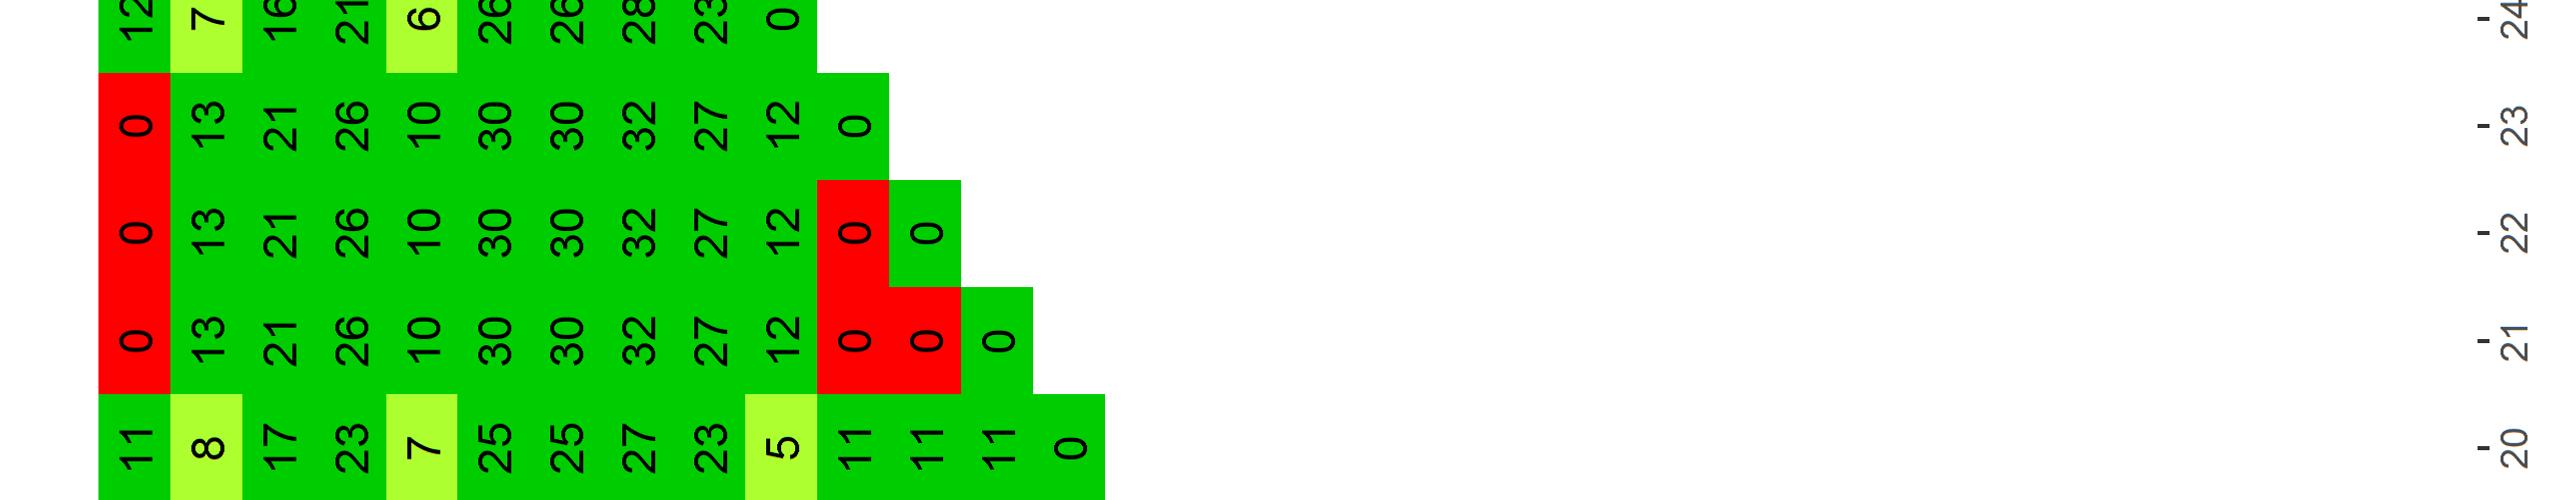

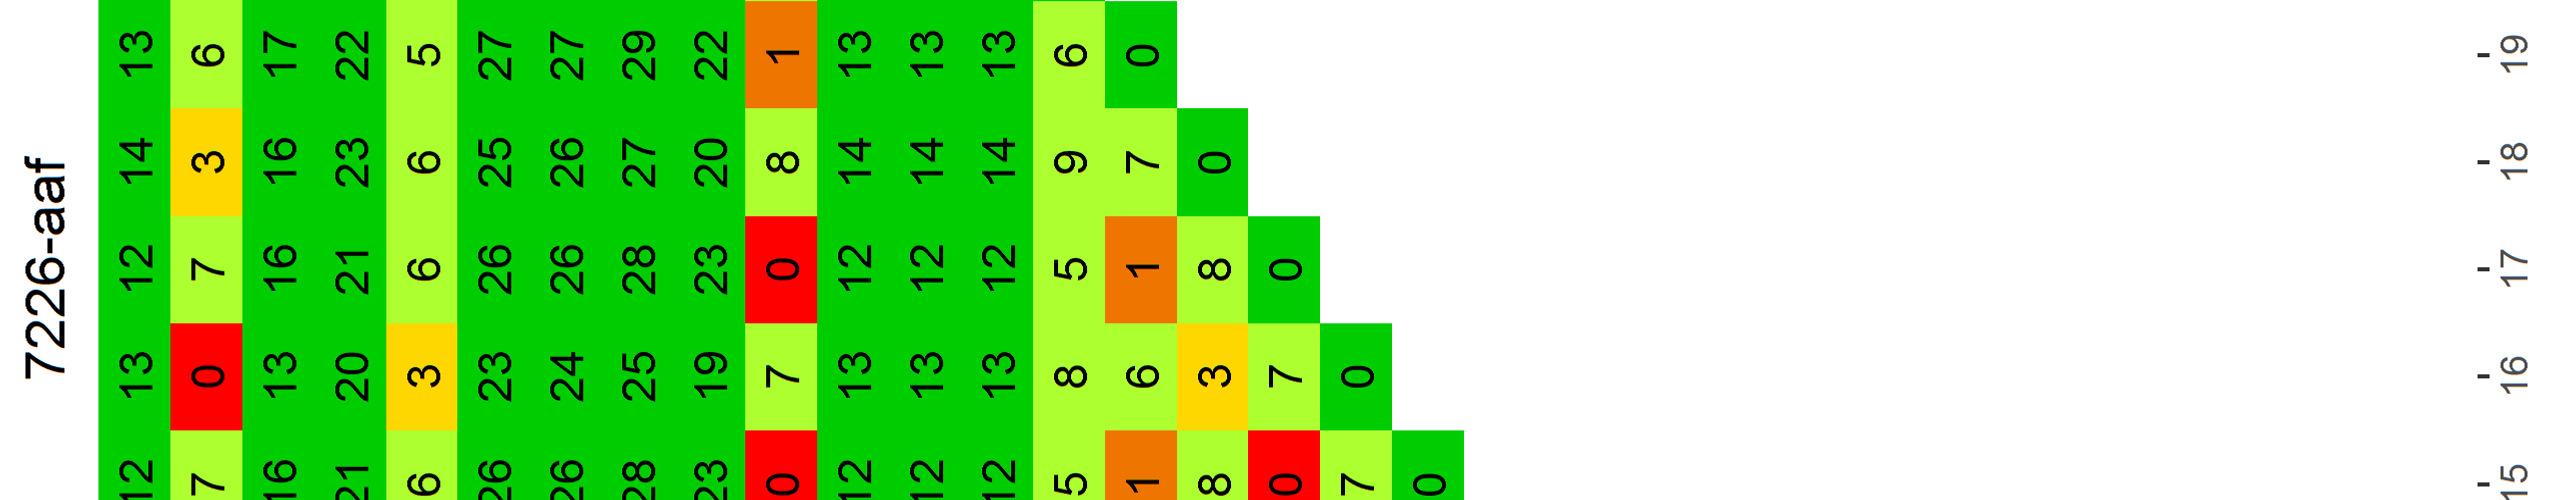

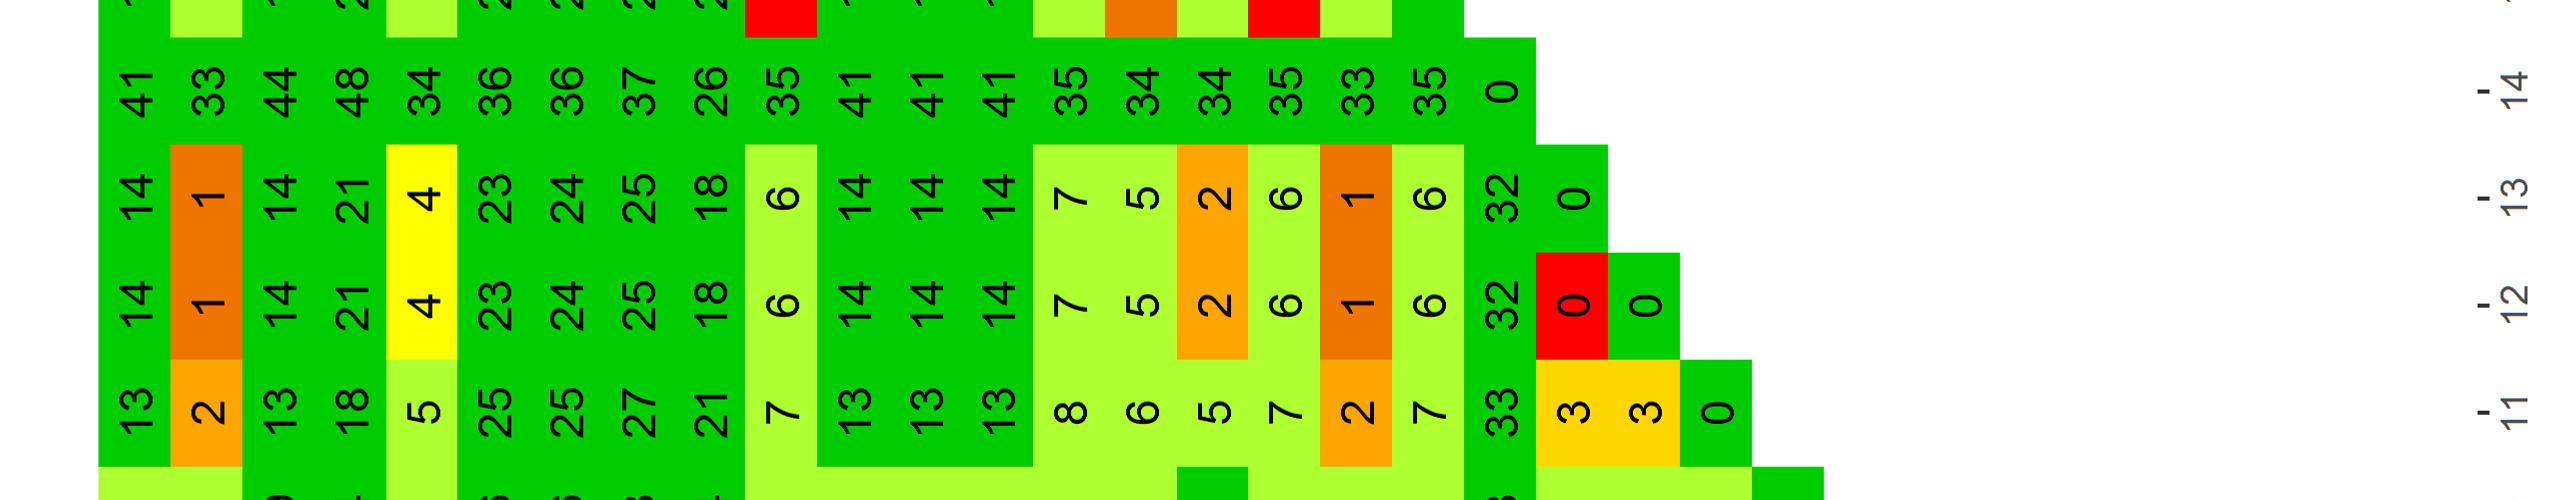

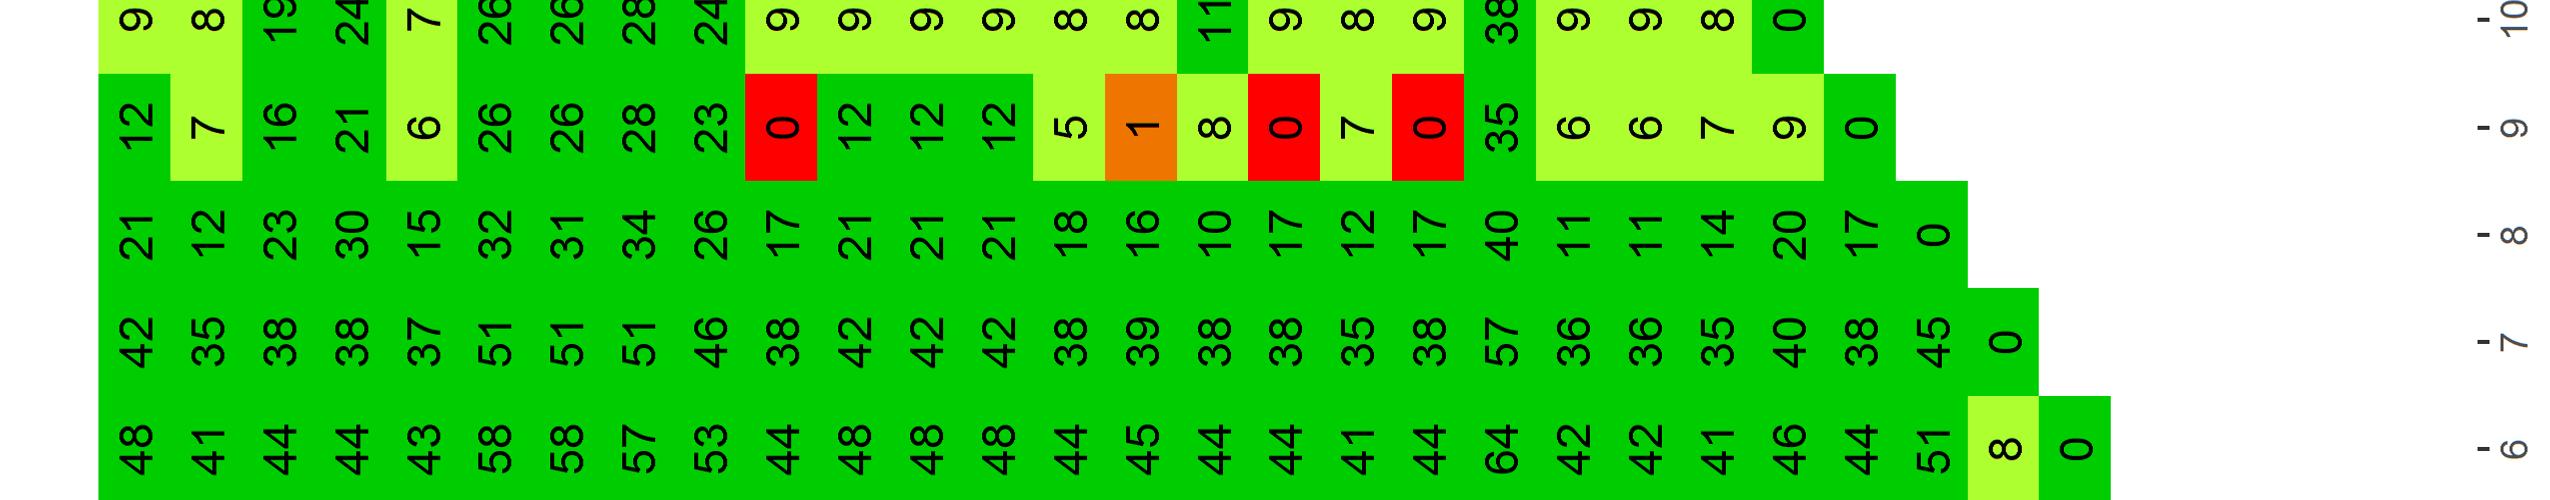

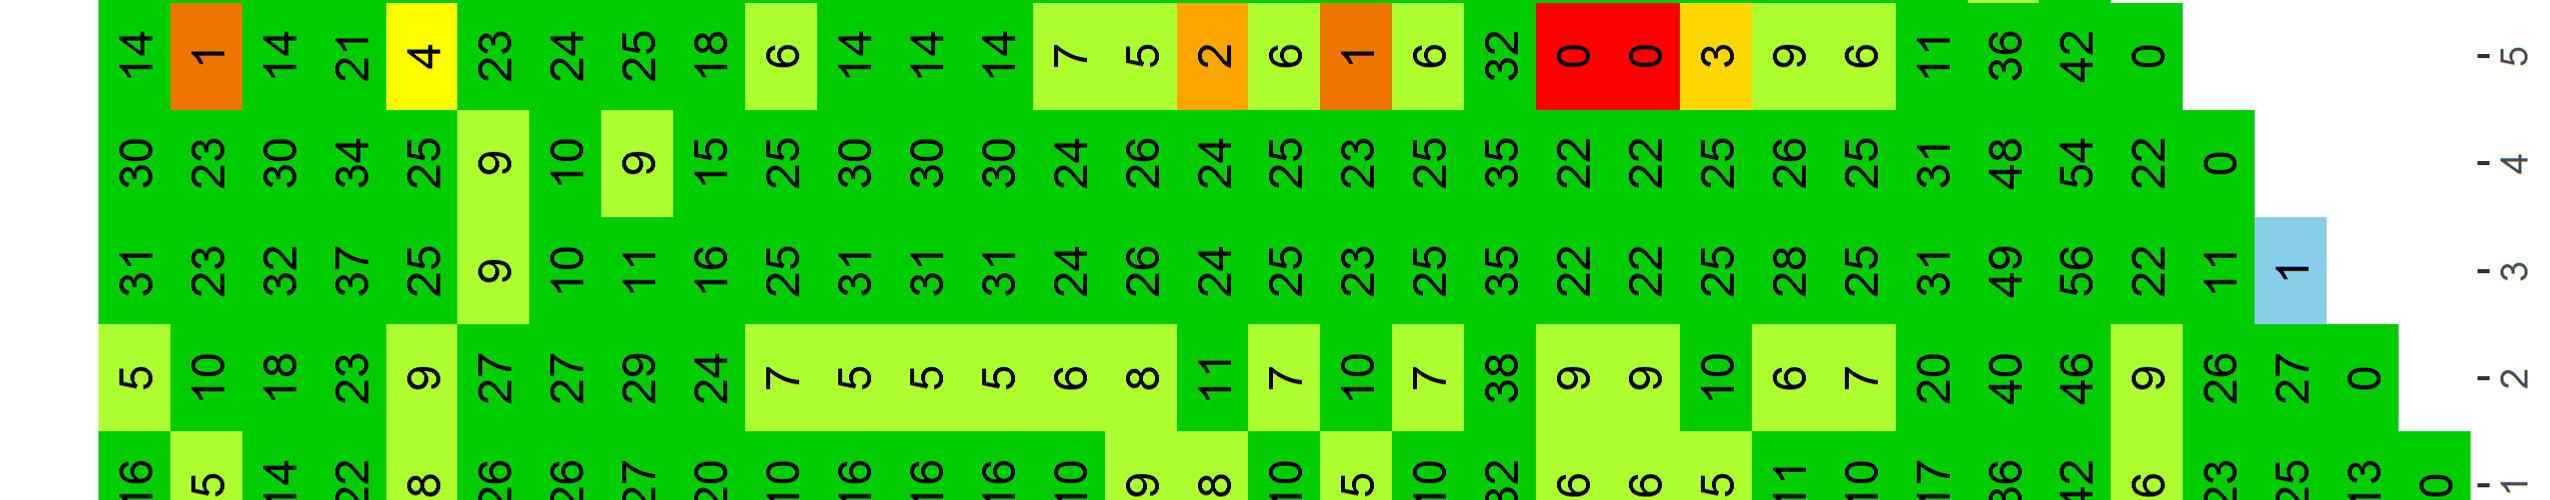

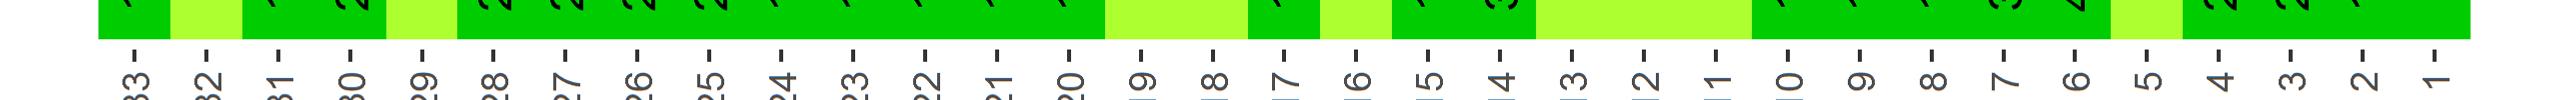

Supplement: Supplementary file 1 [file 14077832]
